# Supplementary material for: Validity and reliability of AI chatbots on the comparative diagnosis and definitive management of deep caries based on position statements evaluated from post-graduate students and clinicians' perspectives
Source: Research Square preprint supplement (doi:10.21203/rs.3.rs-8320702/v1), 2026-01-30
Supplement: Supplementary file 1 [file 4ade559205df090d44be1830.docx]

| **Case History No** | **Response 1** | **Response 2** | **Response 3** |
| --- | --- | --- | --- |
| 1 | Based on a comprehensive review of the provided case history and a comparison of current international recommendations, the following is a detailed comparative diagnosis and definitive treatment plan.  **Comparative Diagnosis**  The patient's clinical presentation is highly consistent across various diagnostic systems. The core findings are a carious lesion causing sharp, transient pain to cold stimuli, which subsides immediately upon removal, with no signs of periapical disease.  **1. American Association of Endodontists (AAE) Classification**  The AAE provides the most standard diagnostic terms used in clinical practice.   - **Pulpal Diagnosis: Reversible Pulpitis**. This diagnosis is based on subjective and objective findings indicating the pulpal inflammation should resolve after managing the cause. The patient's pain is not spontaneous, is provoked by a cold stimulus, and resolves within seconds of removing the stimulus. - **Apical Diagnosis: Normal Apical Tissues**. The tooth is not sensitive to percussion or palpation testing, and the radiograph shows an intact lamina dura and uniform periodontal ligament space.   **2. Indian Endodontic Society (IES) Position Statement Classification**  The IES classification uses a combination of patient symptoms and radiographic findings to determine pulpal status.   - **Symptom Classification: Mild symptomatic (indicative of reversible pulpal changes)**. This is based on symptoms that are of short duration and only occur when a stimulus is applied. The cold test elicited a short, sharp pain that disappeared rapidly. - **Radiographic Depth: Deep Caries**. The lesion extends into dentin but there is a radiographically detectable layer of dentin between the caries and the pulp. It is not "extremely deep," where the lesion penetrates the entire thickness of the dentin. - **Overall Diagnosis:** Based on the combination of mild symptoms and a deep (but not extremely deep) lesion, the diagnosis is **Reversible Pulpitis**.   **3. European Society of Endodontology (ESE) & ORCA/EFCD Consensus**  European guidelines focus on caries depth, pulpal inflammation, and the biological process.   - **Caries Depth:** The lesion is classified as **Deep Caries**, as it reaches the inner quarter of dentine with a detectable zone of hard or firm dentine between the lesion and the pulp. - **Pulpal Diagnosis: Reversible Pulpitis**. This diagnosis is supported by symptoms of shorter-lasting pain that is not spontaneous and resolves after removal of the stimulus. - **Lesion Activity:** The presence of clinical symptoms (sensitivity) indicates the carious lesion is **active**, reflecting ongoing net mineral loss over time.   **4. Wolters et al. (Minimally Invasive Endodontics) Philosophy**  This proposed system offers a more granular classification of pulpitis based on symptom severity.   - **Diagnosis: Initial Pulpitis** or at most **Mild Pulpitis**. This diagnosis corresponds to a "heightened but not lengthened response to the cold test". The pain subsides immediately and is not spontaneous or sensitive to percussion. This clinical picture implies that inflammation is limited and localized to the coronal pulp.   **Diagnostic Summary:** There is a clear consensus across all reviewed guidelines. The tooth has **Reversible Pulpitis** with **Normal Apical Tissues**. The inflammation is mild, localized, and caused by an active, deep carious lesion. The pulp is vital and has a high potential for healing once the etiology is removed.  **Definitive Treatment Plan**  The goal is to eliminate the microbial irritation by removing the caries and placing a well-sealed restoration, thereby allowing the pulp to return to a healthy, non-inflamed state.  **1. Patient-Centered Caries Management & Consent**   - **Individual Diagnosis:** Before treatment, assess and record individual etiological factors. This includes discussing and evaluating the patient's plaque control, dietary habits (especially sugar intake frequency and amount), and regular fluoride use. This comprehensive diagnosis allows for personalized preventive counseling. - **Informed Consent:** Discuss the diagnosis, the proposed treatment, prognosis (excellent), and alternatives (e.g., no treatment, which would likely lead to irreversible pulpitis). Inform the patient that endodontic treatment may be needed in the future, although it is not expected in this case.   **2. Anesthesia and Aseptic Technique**   - **Anesthesia:** Administer local anesthesia for patient comfort. - **Isolation:** The use of a **dental dam is mandatory** and is the standard of care for any nonsurgical endodontic or deep caries management procedure. It is essential for minimizing the risk of bacterial contamination from saliva.   **3. Caries Excavation**   - **Magnification:** The use of magnification (dental loupes or microscope) is highly recommended for improved visualization during caries removal. - **Method:**   - Remove the existing restoration and excavate all carious tooth structure.   - The peripheral cavity walls should be extended to   **hard dentin** to facilitate an optimal seal for the final restoration.   - - For the pulpal floor, given the diagnosis of reversible pulpitis and the radiographic distance from the pulp,   **non-selective (complete) caries removal** is appropriate. This approach is favored over selective removal in this scenario because there is a low risk of pulp exposure.   - - Use sharp spoon excavators or slow-speed round burs for the final removal of caries in the deepest portion to maintain tactile feedback and avoid over-cutting.   - **Dentin consistency (hardness) should be the primary guide** for excavation, as it is more reliable than color.   **4. Pulp Protection and Restoration**   - **Pulp Protection:** In this case, where caries is not extremely deep, a separate pulp capping or lining agent is likely unnecessary. Modern adhesive systems are sufficient. However, if after excavation the remaining dentin is unexpectedly deep, the placement of a hydraulic calcium silicate cement or a glass ionomer cement liner is recommended before the final restoration. - **Definitive Restoration:** Place a well-sealed, permanent **resin composite restoration immediately**, preferably in the same visit. An immediate and high-quality restoration is critical to prevent bacterial microleakage, which is a primary cause of late failures.   **5. Follow-Up and Prognosis Assessment**   - **Instructions:** Advise the patient of the possibility of mild, transient post-operative sensitivity. Instruct them to return if pain becomes spontaneous, severe, or lingering, as this may indicate a progression of the pulpal condition. - **Follow-Up Schedule:** The tooth should be monitored clinically and radiographically at 6 months, and then at 1 year. Subsequent yearly monitoring can continue for up to 4-5 years. - **Success Criteria:** A successful outcome is defined by:   - **Patient-Centric:** Absence of spontaneous pain, pain on palpation/percussion, swelling, or sinus tract.   - **Clinician-Centric:** A positive response to pulp sensibility testing and the absence of any new or enlarging periapical radiolucency on recall radiographs. | Based on the provided case history and a comparative analysis of the attached clinical recommendations, the following diagnosis and definitive treatment plan are presented.  **Comparative Diagnosis**  There is a strong consensus across all provided guidelines regarding the diagnosis of the patient's condition. The key clinical indicators—a sharp, non-lingering pain provoked by a cold stimulus in the presence of a carious lesion without periapical pathology—point to a vital but inflamed pulp that is capable of healing.   - **American Association of Endodontists (AAE) Classification:**   - **Pulpal Diagnosis: Reversible Pulpitis**1. This is indicated by discomfort experienced when a stimulus like cold is applied, which subsides within a couple of seconds after the stimulus is removed2. The pain is not spontaneous3.   - **Apical Diagnosis: Normal Apical Tissues**4. The tooth is not sensitive to percussion or palpation testing, and the radiograph shows an intact lamina dura and a uniform periodontal ligament space5. - **Indian Endodontic Society (IES) Position Statement Classification:**   - **Symptom Classification: Mild symptomatic (indicative of reversible pulpal changes)**6. This is characterized by symptoms that are experienced only when a stimulus is applied and last for a short duration7.   - **Radiographic Depth: Deep Caries**. The lesion extends into dentin but has a layer of radiodense dentin separating it from the pulp8.   - **Overall Diagnosis: Reversible Pulpitis**. This is defined as a mild-to-moderate inflammatory condition where the pulp can return to an uninflamed state after the removal of stimuli9. - **European Society of Endodontology (ESE) & ORCA/EFCD Consensus:**   - **Caries Depth: Deep Caries**. The lesion is described as reaching the inner quarter of dentine but with a zone of hard or firm dentine separating it from the pulp10.   - **Pulpal Diagnosis: Reversible Pulpitis**. The symptoms of shorter-lasting pain without spontaneity are characteristic of reversible pulpitis11.   - **Lesion Activity: Active Carious Lesion**. The presence of clinical symptoms (sensitivity) is an indicator of an "active" lesion, signifying net mineral loss over time12. - **Wolters et al. (Minimally Invasive Endodontics) Philosophy:**   - **Diagnosis: Initial Pulpitis** or **Mild Pulpitis**13131313. This terminology is based on a "heightened but not lengthened response to the cold test, not sensitive to percussion and no spontaneous pain," implying that the inflammation is limited and localized to the crown pulp14141414.   **Diagnostic Summary:** All guidelines converge on a diagnosis of **Reversible Pulpitis with Normal Apical Tissues**, caused by an active, deep carious lesion. The prognosis for maintaining pulp vitality is excellent with appropriate treatment.  **Definitive Treatment Plan**  The definitive treatment plan synthesizes the recommendations from all provided sources, focusing on removing the cause of inflammation, preserving pulp vitality, and ensuring a long-lasting, bacteria-proof restoration.  **1. Patient-Centered Caries Management & Consent**   - **Individual Etiological Assessment:** Before operative treatment, assess and discuss the patient's individual factors contributing to the active caries lesion. This includes evaluating plaque levels, dietary habits (especially sugar intake), and fluoride exposure15. This allows for personalized preventive counseling. - **Informed Consent:** Discuss the diagnosis, proposed treatment, and excellent prognosis. Inform the patient that while the pulp is expected to heal, future endodontic treatment could be a possibility, although unlikely in this case16.   **2. Anesthesia and Aseptic Field**   - **Anesthesia:** Administer appropriate local anesthesia to ensure patient comfort. - **Isolation:** The use of a **dental dam is mandatory** and is the standard of care for managing extensive carious lesions1717171717171717171717171717. This provides an aseptic and clear field and prevents bacterial contamination of the pulp-dentin complex18181818.   **3. Caries Excavation**   - **Magnification:** The use of magnification with dental loupes or a microscope is recommended for better assessment of the tissues during caries removal1919. - **Method:**   - Remove the existing restoration and excavate all carious tooth structure using sterile instruments20.   - Given the diagnosis of reversible pulpitis and the radiographic finding that the lesion is not approaching the pulp chamber,   **non-selective (complete) caries removal** is indicated21. The goal is to remove all soft and firm carious dentin until hard dentin is reached22.   - - **Dentin consistency (hardness) is a more reliable guide** for excavation than color23. Use a sharp hand excavator or slow-speed round bur for the final removal of caries in the deepest portion to provide better tactile feedback24242424.   **4. Pulp Protection and Definitive Restoration**   - **Pulp Protection:** After complete caries removal, if the remaining dentin is deep, place a liner of a **hydraulic calcium silicate-based cement or a glass-ionomer cement** to cover the deep dentin25252525. - **Immediate and Definitive Restoration:** The tooth must be restored with a permanent, well-sealed restoration **at the earliest opportunity, preferably in the same visit**262626262626262626. A bonded resin composite restoration is appropriate. A high-quality coronal seal is of paramount importance for the long-term success of vital pulp therapy, as late failures are often due to bacterial leakage from an improper restoration27272727.   **5. Follow-Up and Prognosis Assessment**   - **Post-operative Instructions:** Inform the patient that minor, transient post-operative sensitivity is possible but should resolve. Instruct the patient to return if symptoms become severe, spontaneous, or lingering. - **Follow-Up Schedule:**   - Assess for post-operative pain at 24 hours, 48 hours, and 7 days2828.   - Recall the patient for clinical and radiographic evaluation at 6 and 12 months, and then at yearly intervals for up to 4 years29292929.   - At each follow-up visit, perform a thorough history, clinical examination, pulp sensibility testing, and take radiographs30. - **Success Criteria:** Treatment is considered successful if the tooth remains asymptomatic (no spontaneous pain, no tenderness to percussion/palpation) 31, responds positively to pulp sensibility tests, and shows no radiographic signs of periapical pathology32323232. | Based on the provided case history and a comparative analysis of the attached clinical recommendations, the following diagnosis and definitive treatment plan are presented.  **Comparative Diagnosis**  There is a strong consensus across all provided guidelines regarding the diagnosis of the patients condition-. The key clinical indicators—a sharp, non-lingering pain provoked by a cold stimulus in the presence of a carious lesion without periapical pathology—point to a vital but inflamed pulp that is capable of healing.   - **American Association of Endodontists (AAE) Classification:**   - **Pulpal Diagnosis: Reversible Pulpitis**2. This is indicated by discomfort experienced when a stimulus like cold is applied, which subsides within a couple of seconds after the stimulus is removed3. The pain is not spontaneous4.   - **Apical Diagnosis: Normal Apical Tissues**5. The tooth is not sensitive to percussion or palpation testing, and the radiograph shows an intact lamina dura and a uniform periodontal ligament space6. - **Indian Endodontic Society (IES) Position Statement Classification:**   - **Symptom Classification: Mild symptomatic (indicative of reversible pulpal changes)**7. This is characterized by symptoms that are experienced only when a stimulus is applied and last for a short duration8.   - **Radiographic Depth: Deep Caries**9. The lesion extends into dentin but has a layer of radiodense dentin separating it from the pulp10.   - **Overall Diagnosis: Reversible Pulpitis**11. This is defined as a mild-to-moderate inflammatory condition where the pulp can return to an uninflamed state after the removal of stimuli12. - **European Society of Endodontology (ESE) & ORCA/EFCD Consensus:**   - **Caries Depth: Deep Caries**13. The lesion is described as reaching the inner quarter of dentine but with a zone of hard or firm dentine separating it from the pulp14.   - **Pulpal Diagnosis: Reversible Pulpitis**15. The symptoms of shorter-lasting pain without spontaneity are characteristic of reversible pulpitis16.   - **Lesion Activity: Active Carious Lesion**17171717. The presence of clinical symptoms (sensitivity) is an indicator of an "active" lesion, signifying net mineral loss over time18181818. - **Wolters et al. (Minimally Invasive Endodontics) Philosophy:**   - **Diagnosis: Initial Pulpitis** or **Mild Pulpitis**19191919. This terminology is based on a "Heightened but not lengthened response to the cold test, not sensitive to percussion and no spontaneous pain" 20, implying that the inflammation is limited and localized to the crown pulp21.   **Diagnostic Summary:** All guidelines converge on a diagnosis of **Reversible Pulpitis with Normal Apical Tissues**, caused by an active, deep carious lesion22222222222222222222222222222222. The prognosis for maintaining pulp vitality is excellent with appropriate treatment.  **Definitive Treatment Plan**  The definitive treatment plan synthesizes the recommendations from all provided sources, focusing on removing the cause of inflammation, preserving pulp vitality, and ensuring a long-lasting, bacteria-proof restoration232323232323232323.  **1. Patient-Centered Caries Management & Consent**   - **Individual Etiological Assessment:** Before operative treatment, assess and record individual etiological factors contributing to the active caries lesion24. This includes evaluating plaque levels, dietary habits (especially sugar intake), and regular fluoride use252525252525252525. This allows for personalized preventive counseling26. - **Informed Consent:** Discuss the diagnosis, proposed treatment, and excellent prognosis. Inform the patient that while the pulp is expected to heal, future endodontic treatment could be a possibility, although it is not expected in this case27272727.   **2. Anesthesia and Aseptic Field**   - **Anesthesia:** Administer appropriate local anesthesia to ensure patient comfort. - **Isolation:** The use of a **dental dam is mandatory** and is the standard of care for managing extensive carious lesions2828282828282828282828282828. It provides an aseptic and clear field and prevents bacterial contamination of the pulp-dentin complex29292929.   **3. Caries Excavation**   - **Magnification:** The use of magnification with dental loupes or a microscope is recommended for better assessment of the tissues during caries removal303030303030303030. - **Method:**   - Remove the existing restoration and excavate all carious tooth structure using sterile instruments31.   - Given the diagnosis of reversible pulpitis and the radiographic finding that the lesion is not approaching the pulp chamber,   **non-selective (complete) caries removal** is indicated323232. The goal is to remove all soft and firm carious dentin until hard dentin is reached33.   - - **Dentin consistency (hardness) is a more reliable guide** for excavation than color34343434. Use a sharp hand excavator or slow-speed round bur for the final removal of caries in the deepest portion to provide better tactile feedback35.   **4. Pulp Protection and Definitive Restoration**   - **Pulp Protection:** After complete caries removal, if the remaining dentin is deep, place a liner of a **hydraulic calcium silicate-based cement or a glass-ionomer cement** to cover the deep dentin363636363636363636. - **Immediate and Definitive Restoration:** The tooth must be restored with a permanent, well-sealed restoration **at the earliest opportunity, preferably in the same visit**373737373737373737. A bonded resin composite restoration is appropriate. A high-quality coronal seal is of paramount importance for the long-term success, as late failures are often due to bacterial leakage from an improper restoration383838383838383838.   **5. Follow-Up and Prognosis Assessment**   - **Post-operative Instructions:** Inform the patient that minor, transient post-operative sensitivity is possible but should resolve. Instruct the patient to return if symptoms become severe, spontaneous, or lingering. - **Follow-Up Schedule:**   - Assess for post-operative pain at 24 hours, 48 hours, and 7 days393939393939.   - Recall the patient for clinical and radiographic evaluation at 6 and 12 months, and then at yearly intervals for up to 4 years404040404040404040.   - At each follow-up visit, perform a thorough history, clinical examination, pulp sensibility testing, and take radiographs4141414141414141414141414141. - **Success Criteria:** Treatment is considered successful if the tooth remains asymptomatic (no spontaneous pain, no tenderness to percussion/palpation), responds positively to pulp sensibility tests, and shows no radiographic signs of periapical pathology424242424242424242. |
| 2 | Based on a comparative analysis of the provided clinical recommendations and the patient's case history, the following diagnosis and definitive treatment plan are presented.  **Comparative Diagnosis**  The patient's primary symptom of sharp, localized pain upon biting and percussion, combined with a vital pulp that responds normally to thermal testing, presents a complex diagnostic picture. The inflammation, originating from a deep carious lesion, has evidently progressed to involve the periapical tissues, even in the absence of radiographic changes.   - **American Association of Endodontists (AAE) Classification:**   - **Pulpal Diagnosis: Asymptomatic Irreversible Pulpitis**1. While the pulp is vital, the deep caries and apical symptoms indicate an inflammatory state that is incapable of healing on its own2. The lack of thermal sensitivity or spontaneous pain rules out   *symptomatic* irreversible pulpitis, making this the most fitting diagnosis3.   - - **Apical Diagnosis: Symptomatic Apical Periodontitis**4. This diagnosis is based directly on the patient's report of pain upon biting and the clinical finding of tenderness to percussion5. The AAE notes that this condition may occur with or without radiographic changes in the periodontal ligament space6. Severe pain to percussion is highly indicative of a degenerating pulp77. - **Indian Endodontic Society (IES) Position Statement Classification:**   - **Diagnosis: Reversible Pulpitis transitioning to Irreversible Pulpitis**. The normal response to the cold test aligns with "Mild symptomatic (indicative of reversible pulpal changes)"8. However, the IES states that teeth with a positive response to percussion are generally not suitable candidates for conservative vital pulp therapy and should be managed with pulpectomy, as this sign is associated with irreversible changes99. Therefore, the condition is best described as an inflamed pulp with pathology extending to the apical tissues. - **European Society of Endodontology (ESE) & Wolters et al. Consensus:**   - **Diagnosis: Moderate Pulpitis** or **Partial Irreversible Pulpitis**. Although the patient lacks the classic lingering thermal pain associated with irreversible pulpitis, the presence of percussion sensitivity is a key indicator of more advanced inflammation10101010. Wolters et al. classify a pulp that is "possibly percussion sensitive" with a prolonged thermal reaction as "Moderate Pulpitis"11. The ESE notes that inflammation is often localized to the coronal portion of the pulp, even when symptoms are severe, suggesting a "partial irreversible pulpitis"1212121212.   Diagnostic Summary:  All guidelines indicate that although the pulp is vital, the inflammation has extended into the periradicular tissues, causing symptomatic apical periodontitis. The pulpal diagnosis is Asymptomatic Irreversible Pulpitis. Traditionally, tenderness to percussion would mandate a full pulpectomy (root canal treatment)13131313. However, recent evidence and updated position statements suggest that a  **full pulpotomy** may be a viable treatment option, contingent upon intra-operative assessment of the pulp's health141414141414141414.  **Definitive Treatment Plan**  The treatment plan must address the irreversible nature of the pulpal inflammation and the symptomatic apical periodontitis. The modern, evidence-based approach is to attempt a full pulpotomy, with the understanding that the procedure will be converted to a full pulpectomy (root canal treatment) if intra-operative findings are unfavorable.  **1. Informed Consent and Pre-operative Procedures**   - **Discussion:** Explain the two primary treatment options to the patient:   - **Full Pulpotomy:** A vital pulp therapy procedure to remove the inflamed coronal pulp tissue while preserving the vital tissue in the roots. This is a less invasive option with high success rates when specific criteria are met151515151515.   - **Nonsurgical Root Canal Treatment (Pulpectomy):** The conventional treatment involving the complete removal of all pulp tissue from the crown and roots16161616. - **Consent:** Obtain informed consent, ensuring the patient understands that the final decision between pulpotomy and pulpectomy will be made during the procedure based on the health of the pulp tissue.   **2. Operative Procedure**   - **Anesthesia and Isolation:** Administer profound local anesthesia. Isolate the tooth with a   **dental dam**, which is the mandatory standard of care to maintain an aseptic field and prevent bacterial contamination171717171717171717.   - **Caries Excavation and Pulp Exposure:**   - Use magnification (dental loupes or microscope) for enhanced visualization18.   - Remove the existing restoration and perform   **complete (non-selective) caries removal** to eliminate all infected tissue until hard dentin is reached19.   - - Upon carious pulp exposure, completely unroof the pulp chamber to gain full access to the coronal pulp tissue. - **Full Pulpotomy and Intra-operative Assessment (Decision Point):**   - Amputate the entire coronal pulp tissue to the level of the root canal orifices using a sterile high-speed round bur with water coolant20202020.   - **Hemostasis and Diagnosis:** This is the most critical diagnostic step21212121. Gently apply a cotton pellet moistened with   **1%-5% sodium hypochlorite (NaOCl)** to the pulp stumps222222222222222222.   - - **Decision Criteria:**     - **Proceed with Pulpotomy:** If hemostasis (cessation of bleeding) is achieved within **5-10 minutes**, it indicates the inflammation is confined to the coronal pulp and the remaining radicular tissue is healthy enough to be preserved23232323.     - **Convert to Pulpectomy (RCT):** If bleeding cannot be controlled within this timeframe, it signifies persistent, deep-seated inflammation (complete irreversible pulpitis), and a full pulpotomy is no longer indicated24242424. The procedure must then be converted to a nonsurgical root canal treatment. - **Completion of Pulpotomy (if indicated):**   - **Pulp Capping:** Place a 2-3 mm layer of a **hydraulic calcium silicate-based cement** (e.g., MTA, Biodentine) directly over the healthy, bleeding-controlled pulp stumps25252525252525252525252525252525.   - **Restoration:** Place a well-sealed, **immediate permanent restoration** (core build-up) over the cement in the same visit to prevent bacterial microleakage26262626. For a posterior tooth with a large pre-existing restoration, a   **full cuspal coverage restoration** (e.g., a crown) is recommended to prevent future fracture27.  **3. Follow-up**   - **Monitoring:** Schedule follow-up appointments at 6 months and 1 year, then annually for up to 4 years28282828. - **Success Assessment:** A successful outcome is defined by the absence of clinical signs and symptoms (especially pain on biting/percussion) and no new or enlarging periapical radiolucency on recall radiographs292929292929292929. The tooth is expected to be unresponsive to thermal tests after a full pulpotomy but may respond to EPT30303030. | Based on a comparative analysis of the provided clinical recommendations and the patient's case history, the following diagnosis and definitive treatment plan are presented.  **Comparative Diagnosis**  The patient's primary symptom of sharp, localized pain upon biting and percussion, combined with a vital pulp that responds normally to thermal testing, presents a complex diagnostic picture. The inflammation, originating from a deep carious lesion, has evidently progressed to involve the periapical tissues, even in the absence of radiographic changes.   - **American Association of Endodontists (AAE) Classification:**   - **Pulpal Diagnosis: Asymptomatic Irreversible Pulpitis**11. While the pulp is vital, the deep caries and apical symptoms indicate an inflammatory state that is incapable of healing on its own22. The lack of thermal sensitivity or spontaneous pain rules out   *symptomatic* irreversible pulpitis, making this the most fitting diagnosis3333. The presence of percussion pain is considered an indicator of an irreversibly inflamed state4.   - - **Apical Diagnosis: Symptomatic Apical Periodontitis**55. This diagnosis is based directly on the patient's report of pain upon biting and the clinical finding of tenderness to percussion66. The AAE notes that this condition may occur with or without radiographic changes in the periodontal ligament space7. Severe pain to percussion is highly indicative of a degenerating pulp and a need for root canal treatment88. - **Indian Endodontic Society (IES) Position Statement Classification:**   - **Diagnosis: Partial Irreversible Pulpitis (restricted to the coronal pulp)**9. The normal response to the cold test aligns with "Mild symptomatic (indicative of reversible pulpal changes)"10. However, the IES states that teeth with a positive response to percussion are generally not suitable candidates for the most conservative vital pulp therapies and should be managed with pulpotomy or pulpectomy, as this sign is associated with irreversible changes extending from the pulp1111. - **European Society of Endodontology (ESE) & Wolters et al. Consensus:**   - **Diagnosis: Mild to Moderate Pulpitis / Partial Irreversible Pulpitis**1212121212. Although the patient lacks the classic lingering thermal pain associated with irreversible pulpitis, the presence of percussion sensitivity is a key indicator of more advanced inflammation13131313. Wolters et al. classify a pulp that is "possibly percussion sensitive" with a normal (not lengthened) thermal reaction as   **Mild Pulpitis**14. The ESE suggests the term  **Partial Irreversible Pulpitis** to describe inflammation that may be confined to the coronal portion of the pulp even when symptoms are present15.  Diagnostic Summary:  All guidelines indicate that although the pulp is vital, the inflammation has extended into the periradicular tissues, causing symptomatic apical periodontitis1616. The pulpal diagnosis is  **Asymptomatic Irreversible Pulpitis**1717. Traditionally, tenderness to percussion would mandate a full pulpectomy (root canal treatment)18181818. However, recent evidence and updated position statements suggest that a  **full pulpotomy** may be a viable treatment option, contingent upon intra-operative assessment of the pulp's health19191919191919191919191919191919191919191919.  **Definitive Treatment Plan**  The treatment plan must address the irreversible nature of the pulpal inflammation and the symptomatic apical periodontitis20202020. The modern, evidence-based approach is to attempt a full pulpotomy, with the understanding that the procedure will be converted to a full pulpectomy (root canal treatment) if intra-operative findings are unfavorable212121212121212121212121.  **1. Informed Consent and Pre-operative Procedures**   - **Discussion:** Explain the two primary treatment options to the patient:   - **Full Pulpotomy:** A vital pulp therapy procedure to remove the inflamed coronal pulp tissue while preserving the vital tissue in the roots2222222222. This is a less invasive option with high success rates when specific criteria are met23.   - **Nonsurgical Root Canal Treatment (Pulpectomy):** The conventional treatment involving the complete removal of all pulp tissue from the crown and roots24242424. - **Consent:** Obtain informed consent, ensuring the patient understands that the final decision between pulpotomy and pulpectomy will be made during the procedure based on the health of the pulp tissue25252525.   **2. Operative Procedure**   - **Anesthesia and Isolation:** Administer profound local anesthesia. Isolate the tooth with a   **dental dam**, which is the mandatory standard of care to maintain an aseptic field and prevent bacterial contamination262626262626262626.   - **Caries Excavation and Pulp Exposure:**   - Use magnification (dental loupes or microscope) for enhanced visualization27272727.   - Remove the existing restoration and perform   **complete (non-selective) caries removal** to eliminate all infected tissue until hard dentin is reached28282828.   - - Upon carious pulp exposure, completely unroof the pulp chamber to gain full access to the coronal pulp tissue29. - **Full Pulpotomy and Intra-operative Assessment (Decision Point):**   - Amputate the entire coronal pulp tissue to the level of the root canal orifices using a sterile high-speed round bur with water coolant303030303030303030.   - **Hemostasis and Diagnosis:** This is the most critical diagnostic step31. Gently apply a cotton pellet moistened with   **1%–5% sodium hypochlorite (NaOCl)** to the pulp stumps32323232323232323232323232323232.   - - **Decision Criteria:**     - **Proceed with Pulpotomy:** If hemostasis (cessation of bleeding) is achieved within **5–10 minutes**, it indicates the inflammation is confined to the coronal pulp and the remaining radicular tissue is healthy enough to be preserved33333333333333333333333333333333.     - **Convert to Pulpectomy (RCT):** If bleeding cannot be controlled within this timeframe, it signifies persistent, deep-seated inflammation (complete irreversible pulpitis), and a full pulpotomy is no longer indicated343434343434343434343434. The procedure must then be converted to a nonsurgical root canal treatment35353535. - **Completion of Pulpotomy (if indicated):**   - **Pulp Capping:** Place a 2–3 mm layer of a **hydraulic calcium silicate-based cement** (e.g., MTA, Biodentine) directly over the healthy, bleeding-controlled pulp stumps36363636363636363636363636363636.   - **Restoration:** Place a well-sealed, **immediate permanent restoration** (core build-up) over the cement in the same visit to prevent bacterial microleakage373737373737373737. For a posterior tooth with a large pre-existing restoration, a   **full cuspal coverage restoration** (e.g., a crown) is recommended to prevent future fracture38.  **3. Follow-up**   - **Monitoring:** Schedule follow-up appointments at 6 months and 1 year, then annually for up to 4 years39393939. - **Success Assessment:** A successful outcome is defined by the absence of clinical signs and symptoms (especially pain on biting/percussion) and no new or enlarging periapical radiolucency on recall radiographs40404040404040404040404040404040404040404040. The tooth is expected to be unresponsive to thermal tests after a full pulpotomy but may respond to EPT414141414141414141. | Based on a comparative analysis of the provided clinical recommendations and the patient's case history, the following diagnosis and definitive treatment plan are presented.  **Comparative Diagnosis**  The patient's primary symptom of sharp, localized pain upon biting and percussion, combined with a vital pulp that responds normally to thermal testing, presents a complex diagnostic picture. The inflammation, originating from a deep carious lesion, has evidently progressed to involve the periapical tissues, even in the absence of radiographic changes.   - **American Association of Endodontists (AAE) Classification:**   - **Pulpal Diagnosis: Asymptomatic Irreversible Pulpitis**11. While the pulp is vital, the deep caries and apical symptoms indicate an inflammatory state that is incapable of healing on its own22. The lack of thermal sensitivity or spontaneous pain rules out   *symptomatic* irreversible pulpitis, making this the most fitting diagnosis3333. The presence of percussion pain is considered an indicator of an irreversibly inflamed state4.   - - **Apical Diagnosis: Symptomatic Apical Periodontitis**55. This diagnosis is based directly on the patient's report of pain upon biting and the clinical finding of tenderness to percussion66. The AAE notes that this condition may occur with or without radiographic changes in the periodontal ligament space7. Severe pain to percussion is highly indicative of a degenerating pulp and a need for root canal treatment88. - **Indian Endodontic Society (IES) Position Statement Classification:**   - **Diagnosis: Partial Irreversible Pulpitis (restricted to the coronal pulp)**9. The normal response to the cold test aligns with "Mild symptomatic (indicative of reversible pulpal changes)"10. However, the IES states that teeth with a positive response to percussion are generally not suitable candidates for the most conservative vital pulp therapies and should be managed with pulpotomy or pulpectomy, as this sign is associated with irreversible changes extending from the pulp1111. - **European Society of Endodontology (ESE) & Wolters et al. Consensus:**   - **Diagnosis: Mild to Moderate Pulpitis / Partial Irreversible Pulpitis**1212121212. Although the patient lacks the classic lingering thermal pain associated with irreversible pulpitis, the presence of percussion sensitivity is a key indicator of more advanced inflammation13131313. Wolters et al. classify a pulp that is "possibly percussion sensitive" with a normal (not lengthened) thermal reaction as   **Mild Pulpitis**14. The ESE suggests the term  **Partial Irreversible Pulpitis** to describe inflammation that may be confined to the coronal portion of the pulp even when symptoms are present15.  Diagnostic Summary:  All guidelines indicate that although the pulp is vital, the inflammation has extended into the periradicular tissues, causing symptomatic apical periodontitis1616. The pulpal diagnosis is  **Asymptomatic Irreversible Pulpitis**1717. Traditionally, tenderness to percussion would mandate a full pulpectomy (root canal treatment)18181818. However, recent evidence and updated position statements suggest that a  **full pulpotomy** may be a viable treatment option, contingent upon intra-operative assessment of the pulp's health19191919191919191919191919191919191919191919.  **Definitive Treatment Plan**  The treatment plan must address the irreversible nature of the pulpal inflammation and the symptomatic apical periodontitis20202020. The modern, evidence-based approach is to attempt a full pulpotomy, with the understanding that the procedure will be converted to a full pulpectomy (root canal treatment) if intra-operative findings are unfavorable212121212121212121212121.  **1. Informed Consent and Pre-operative Procedures**   - **Discussion:** Explain the two primary treatment options to the patient:   - **Full Pulpotomy:** A vital pulp therapy procedure to remove the inflamed coronal pulp tissue while preserving the vital tissue in the roots2222222222. This is a less invasive option with high success rates when specific criteria are met23.   - **Nonsurgical Root Canal Treatment (Pulpectomy):** The conventional treatment involving the complete removal of all pulp tissue from the crown and roots24242424. - **Consent:** Obtain informed consent, ensuring the patient understands that the final decision between pulpotomy and pulpectomy will be made during the procedure based on the health of the pulp tissue25252525.   **2. Operative Procedure**   - **Anesthesia and Isolation:** Administer profound local anesthesia. Isolate the tooth with a   **dental dam**, which is the mandatory standard of care to maintain an aseptic field and prevent bacterial contamination262626262626262626.   - **Caries Excavation and Pulp Exposure:**   - Use magnification (dental loupes or microscope) for enhanced visualization27272727.   - Remove the existing restoration and perform   **complete (non-selective) caries removal** to eliminate all infected tissue until hard dentin is reached28282828.   - - Upon carious pulp exposure, completely unroof the pulp chamber to gain full access to the coronal pulp tissue29. - **Full Pulpotomy and Intra-operative Assessment (Decision Point):**   - Amputate the entire coronal pulp tissue to the level of the root canal orifices using a sterile high-speed round bur with water coolant303030303030303030.   - **Hemostasis and Diagnosis:** This is the most critical diagnostic step31. Gently apply a cotton pellet moistened with   **1%–5% sodium hypochlorite (NaOCl)** to the pulp stumps32323232323232323232323232323232.   - - **Decision Criteria:**     - **Proceed with Pulpotomy:** If hemostasis (cessation of bleeding) is achieved within **5–10 minutes**, it indicates the inflammation is confined to the coronal pulp and the remaining radicular tissue is healthy enough to be preserved33333333333333333333333333333333.     - **Convert to Pulpectomy (RCT):** If bleeding cannot be controlled within this timeframe, it signifies persistent, deep-seated inflammation (complete irreversible pulpitis), and a full pulpotomy is no longer indicated343434343434343434343434. The procedure must then be converted to a nonsurgical root canal treatment35353535. - **Completion of Pulpotomy (if indicated):**   - **Pulp Capping:** Place a 2–3 mm layer of a **hydraulic calcium silicate-based cement** (e.g., MTA, Biodentine) directly over the healthy, bleeding-controlled pulp stumps36363636363636363636363636363636.   - **Restoration:** Place a well-sealed, **immediate permanent restoration** (core build-up) over the cement in the same visit to prevent bacterial microleakage373737373737373737. For a posterior tooth with a large pre-existing restoration, a   **full cuspal coverage restoration** (e.g., a crown) is recommended to prevent future fracture38.  **3. Follow-up**   - **Monitoring:** Schedule follow-up appointments at 6 months and 1 year, then annually for up to 4 years39393939. - **Success Assessment:** A successful outcome is defined by the absence of clinical signs and symptoms (especially pain on biting/percussion) and no new or enlarging periapical radiolucency on recall radiographs40404040404040404040404040404040404040404040. The tooth is expected to be unresponsive to thermal tests after a full pulpotomy but may respond to EPT414141414141414141. |
| 3 | Based on a comparative analysis of the provided clinical recommendations and the patient's case history, the following diagnosis and definitive treatment plan are presented.  **Comparative Diagnosis**  There is a clear consensus across all provided guidelines regarding the diagnosis of the patient's condition [user]. The key clinical indicators—a sharp, transient pain provoked by a cold stimulus that subsides immediately, with no spontaneous pain or tenderness to percussion—point definitively to a mild, reversible inflammation of a vital pulp caused by a carious lesion [user].   - **American Association of Endodontists (AAE) Classification:**   - **Pulpal Diagnosis: Reversible Pulpitis**1. This diagnosis is based on findings that the discomfort is experienced when a stimulus like cold is applied and resolves within a couple of seconds after the stimulus is removed2. The pain is not spontaneous3.   - **Apical Diagnosis: Normal Apical Tissues**4. The tooth is not sensitive to percussion or palpation testing, and the radiograph shows an intact lamina dura and uniform periodontal ligament space [user, 110]. - **Indian Endodontic Society (IES) Position Statement Classification:**   - **Symptom Classification: Mild symptomatic (indicative of reversible pulpal changes)**555. This is characterized by symptoms that are experienced only when a stimulus is applied and last for a short duration666. The cold test elicits a short sharp pain that disappears rapidly once the stimulus is removed777.   - **Radiographic Depth: Deep Caries**88. The lesion extends into the dentin but is separated from the pulp by a radiographically detectable layer of dentin [user, 577].   - **Overall Diagnosis: Reversible Pulpitis**9. This is defined as a mild-to-moderate inflammatory condition where the pulp is capable of returning to an uninflamed state following the removal of the stimuli10. - **European Society of Endodontology (ESE) & ORCA/EFCD Consensus:**   - **Pulpal Diagnosis: Reversible Pulpitis**111111. The symptoms of shorter-lasting, non-spontaneous pain are characteristic of reversible pulpitis121212.   - **Caries Depth: Deep Caries**13. The lesion reaches the inner quarter of the dentine but has a zone of hard or firm dentine between the caries and the pulp14.   - **Lesion Activity: Active Carious Lesion**15. The presence of clinical symptoms (sensitivity) is an indicator of an "active" lesion, signifying ongoing net mineral loss [user, 1626]. - **Wolters et al. (Minimally Invasive Endodontics) Philosophy:**   - **Diagnosis: Initial Pulpitis** or **Mild Pulpitis**16161616. This terminology is based on a "Heightened but not lengthened response to the cold test, not sensitive to percussion and no spontaneous pain"17171717. This clinical picture implies that inflammation is limited and localized to the crown pulp18.   **Diagnostic Summary:** All guidelines converge on a diagnosis of **Reversible Pulpitis with Normal Apical Tissues**, caused by an active, deep carious lesion191919191919191919. The prognosis for maintaining pulp vitality is excellent with appropriate restorative treatment20.  **Definitive Treatment Plan**  The definitive treatment plan synthesizes the recommendations from all provided sources, focusing on a minimally invasive, biology-based approach to remove the cause of inflammation, preserve pulp vitality, and ensure a long-lasting, bacteria-proof restoration.  **1. Patient-Centered Caries Management & Consent**   - **Individual Etiological Assessment:** Before operative treatment, assess and record individual etiological factors contributing to the active caries lesion [user]. This includes evaluating the patient's plaque levels, dietary habits (especially sugar intake), and regular fluoride use212121212121212121. This allows for personalized preventive counseling to manage caries as a chronic disease. - **Informed Consent:** Discuss the diagnosis, proposed treatment, and excellent prognosis [user, 86]. Inform the patient that while the pulp is expected to heal, future endodontic treatment could be a possibility, although it is not expected in this case22.   **2. Anesthesia and Aseptic Field**   - **Anesthesia:** Administer appropriate local anesthesia to ensure patient comfort. - **Isolation:** The use of a **dental dam is mandatory** and is the standard of care for managing deep carious lesions2323232323232323. This provides an aseptic and clear field and prevents bacterial contamination.   **3. Caries Excavation**   - **Magnification:** The use of magnification with dental loupes or a microscope is highly recommended for better assessment of the tissues during caries removal24242424. - **Method: Selective Carious-Tissue Removal**. For a deep carious lesion in a tooth with reversible pulpitis, a selective one-stage excavation is the recommended approach to minimize the risk of pulp exposure25252525.   - Remove the existing restoration and excavate all carious tissue from the peripheral cavity walls until   **hard dentin** is reached26. This ensures an optimal seal for the final restoration.   - - In the deepest portion directly over the pulp, carious tissue should be removed until   **firm dentin** is reached27. Soft dentin may be left only in this pulpal area if its complete removal would risk pulp exposure28.   - - Use sharp hand excavators for the deepest portion to provide better tactile feedback and avoid over-cutting29.   **4. Pulp Protection and Definitive Restoration**   - **Pulp Protection:** After selective caries removal, place a liner of a **hydraulic calcium silicate-based cement or a glass-ionomer cement** to cover the deep, remaining firm dentin30303030. - **Immediate and Definitive Restoration:** The tooth must be restored with a permanent, well-sealed restoration **at the earliest opportunity, preferably in the same visit**31313131. A bonded resin composite restoration is appropriate for this anterior tooth. A high-quality coronal seal is of paramount importance for long-term success, as late failures are often due to bacterial microleakage from an improper restoration32.   **5. Follow-Up and Prognosis Assessment**   - **Post-operative Instructions:** Inform the patient that minor, transient post-operative sensitivity is possible but should resolve. Instruct the patient to return if symptoms become severe, spontaneous, or lingering. - **Follow-Up Schedule:**   - Recall the patient for clinical and radiographic evaluation at   **6 and 12 months**, and then at yearly intervals for up to 4 years333333.   - - At each follow-up visit, perform a thorough history, clinical examination, pulp sensibility testing, and take radiographs34. - **Success Criteria:** Treatment is considered successful if the tooth remains asymptomatic (no spontaneous pain, no tenderness to percussion/palpation), responds positively to pulp sensibility tests, and shows no radiographic signs of periapical pathology35353535. | Based on a comparative analysis of the provided clinical recommendations and the patient's case history, the following diagnosis and definitive treatment plan are presented.  **Comparative Diagnosis**  The patient's clinical presentation is highly consistent across various diagnostic systems [user]. The core findings are a carious lesion causing sharp, transient pain to cold stimuli, which subsides immediately upon removal, with no signs of periapical disease [user].   - **American Association of Endodontists (AAE) Classification:**   - **Pulpal Diagnosis: Reversible Pulpitis**11. This diagnosis is based on subjective and objective findings indicating the pulpal inflammation should resolve after managing the cause22. The patient's pain is not spontaneous, is provoked by a cold stimulus, and resolves within a couple of seconds of removing the stimulus3.   - **Apical Diagnosis: Normal Apical Tissues**44. The tooth is not sensitive to percussion or palpation testing, and the radiograph shows an intact lamina dura and uniform periodontal ligament space. - **Indian Endodontic Society (IES) Position Statement Classification:**   - **Symptom Classification: Mild symptomatic (indicative of reversible pulpal changes)**5. This is based on symptoms that are of short duration and only occur when a stimulus is applied6. The cold test elicited a short, sharp pain that disappeared rapidly.   - **Radiographic Depth: Deep Caries**7. The lesion extends into dentin but there is a radiographically detectable layer of dentin between the caries and the pulp.   - **Overall Diagnosis: Reversible Pulpitis**8. This is defined as a mild-to-moderate inflammatory condition where the pulp is capable of returning to the uninflamed state following removal of the stimuli9. - **European Society of Endodontology (ESE) & ORCA/EFCD Consensus:**   - **Caries Depth: Deep Caries**101010. The lesion is described as reaching the inner quarter of dentine but with a zone of hard or firm dentine between the lesion and the pulp.   - **Pulpal Diagnosis: Reversible Pulpitis**1111. This diagnosis is supported by symptoms of shorter-lasting pain that is not spontaneous and resolves after removal of the stimulus12121212.   - **Lesion Activity: Active Carious Lesion**. The presence of clinical symptoms (sensitivity) is an indicator of an "active" lesion, reflecting ongoing net mineral loss over time. - **Wolters et al. (Minimally Invasive Endodontics) Philosophy:**   - **Diagnosis: Initial Pulpitis** or **Mild Pulpitis**13131313. This terminology is based on a "Heightened but not lengthened response to the cold test, not sensitive to percussion and no spontaneous pain". This clinical picture implies that inflammation is limited and localized to the crown pulp141414.   Diagnostic Summary:  There is a clear consensus across all reviewed guidelines. The tooth has  **Reversible Pulpitis with Normal Apical Tissues**15151515. The inflammation is mild, localized, and caused by an active, deep carious lesion161616161616161616. The pulp is vital and has a high potential for healing once the etiology is removed.  **Definitive Treatment Plan**  The goal is to eliminate the microbial irritation by removing the caries and placing a well-sealed restoration, thereby allowing the pulp to return to a healthy, non-inflamed state.  **1. Patient-Centered Caries Management & Consent**   - **Individual Etiological Assessment:** Before operative treatment, assess and record the patient's individual etiological factors171717171717171717. This includes discussing and evaluating the patient's plaque control, dietary habits (especially sugar intake), and regular fluoride use181818181818181818. This comprehensive diagnosis allows for personalized preventive counseling. - **Informed Consent:** Discuss the diagnosis, the proposed treatment, prognosis (excellent), and alternatives (e.g., no treatment, which would likely lead to irreversible pulpitis) [user]. Inform the patient that endodontic treatment may be needed in the future, although it is not expected in this case19.   **2. Anesthesia and Aseptic Technique**   - **Anesthesia:** Administer local anesthesia to ensure patient comfort. - **Isolation:** The use of a **dental dam is mandatory** and is the standard of care for any procedure involving caries removal where pulpal health is a concern2020202020202020202020202020.   **3. Caries Excavation**   - **Magnification:** The use of magnification (dental loupes or microscope) is recommended for improved visualization during caries removal21212121. - **Method:**   - Remove the existing restoration and excavate all carious tooth structure using sterile instruments.   - Given the diagnosis of reversible pulpitis and the radiographic distance from the pulp,   **non-selective (complete) caries removal** is the recommended approach22. The goal is to excavate all soft and firm carious dentin until hard dentin is reached23.   - - Selective caries removal is a technique reserved for deep carious lesions where there is a high risk of pulp exposure, which is not the case here24.   - The   **consistency (hardness) of the dentin** should be the primary guide for determining the extent of caries removal, as it is more reliable than color25.  **4. Pulp Protection and Definitive Restoration**   - **Pulp Protection:** In this case, where caries is not extremely deep, a separate pulp capping or lining agent is likely unnecessary. However, if after excavation the remaining dentin is deeper than anticipated, the placement of a liner material such as a   **hydraulic calcium silicate or a glass ionomer cement** is recommended before the final restoration26.   - **Immediate and Definitive Restoration:** The tooth must be restored with a well-sealed, definitive restoration **as soon as possible, preferably in the same visit**27. A bonded resin composite restoration is appropriate. A high-quality restoration is critical to prevent bacterial microleakage, which is a primary cause of late failures28.   **5. Follow-Up and Prognosis Assessment**   - **Post-operative Instructions:** Advise the patient of the possibility of mild, transient post-operative sensitivity. Instruct them to return if pain becomes spontaneous, severe, or lingering, as this may indicate a progression of the pulpal condition. - **Follow-Up Schedule:**   - Assess for post-operative pain at 24 hours, 48 hours, and 7 days29.   - Recall the patient for clinical and radiographic evaluation at 6 and 12 months, and then at yearly intervals for 4 years thereafter30303030. - **Success Criteria:** A successful outcome is defined by:   - **Patient-Centric:** Absence of spontaneous pain, pain on palpation/percussion, swelling, or sinus tract31313131.   - **Clinician-Centric:** A positive response to pulp sensibility testing and the absence of any new or enlarging periapical radiolucency on recall radiographs32323232. | Based on a comparative analysis of the provided clinical recommendations and the patient's case history, the following diagnosis and definitive treatment plan are presented.  **Comparative Diagnosis**  The patient's clinical presentation is classic for a localized, reversible inflammation of the pulp caused by a carious lesion [user]. The symptoms and findings align consistently across all provided diagnostic systems.   - **American Association of Endodontists (AAE) Classification:**   - **Pulpal Diagnosis: Reversible Pulpitis**. This diagnosis is based on the finding that the discomfort is not spontaneous, is provoked by a cold stimulus, and "goes away within a couple of seconds following the removal of the stimulus"1.   - **Apical Diagnosis: Normal Apical Tissues**. This is determined by the absence of tenderness to percussion or palpation and the normal radiographic appearance of the lamina dura and periodontal ligament space2. - **Indian Endodontic Society (IES) Position Statement Classification:**   - **Symptom Classification: Mild symptomatic (indicative of reversible pulpal changes)**. This category is for symptoms that occur only upon stimulation and are of short duration3.   - **Radiographic Depth: Deep Caries**. The radiograph shows the lesion extending into the dentin with a visible layer of radiodense dentin between the caries and the pulp4.   - **Overall Diagnosis: Reversible Pulpitis**. This is a mild-to-moderate inflammatory condition where the pulp is capable of returning to an uninflamed state after the removal of the stimulus5. - **European Society of Endodontology (ESE) & ORCA/EFCD Consensus:**   - **Caries Depth: Deep Caries**. The lesion reaches the inner quarter of the dentine but has a zone of hard or firm dentine between it and the pulp6.   - **Pulpal Diagnosis: Reversible Pulpitis**. This diagnosis is supported by "episodes of less intense, shorter-lasting pain" without spontaneous or lingering symptoms7.   - **Lesion Activity: Active Carious Lesion**. The presence of clinical symptoms (sensitivity) is a key indicator of an "active" lesion, which implies caries progression8. - **Wolters et al. (Minimally Invasive Endodontics) Philosophy:**   - **Diagnosis: Initial Pulpitis** or **Mild Pulpitis**. This terminology is based on a "Heightened but not lengthened response to the cold test, not sensitive to percussion and no spontaneous pain"9999, which perfectly matches the patient's presentation.   Diagnostic Summary:  All guidelines converge on a diagnosis of Reversible Pulpitis with Normal Apical Tissues, caused by an active, deep carious lesion [user]. The prognosis for maintaining pulp vitality is excellent with appropriate treatment.  **Definitive Treatment Plan**  The treatment plan focuses on removing the cause of inflammation, preserving pulp vitality, and placing a durable, well-sealed restoration to prevent future bacterial irritation.  **1. Patient-Centered Caries Management & Consent**   - **Individual Etiological Assessment:** Before operative treatment, it is recommended to assess and record the patient's individual etiological factors, such as plaque levels, dietary habits (sugar intake), and fluoride use, as they present with an active lesion101010101010101010. This allows for personalized preventive counseling. - **Informed Consent:** Discuss the diagnosis, the proposed restorative treatment, and the excellent prognosis with the patient [user]. Inform the patient that endodontic treatment may be indicated in the future, although this is a very low risk11.   **2. Anesthesia and Aseptic Field**   - **Anesthesia:** Administer appropriate local anesthesia for patient comfort. - **Isolation:** The use of a **dental dam is mandatory** and is the standard of care for managing deep carious lesions to maintain an aseptic field and prevent salivary contamination121212121212121212.   **3. Caries Excavation**   - **Magnification:** The use of magnification with dental loupes or a microscope is recommended for better assessment of the tissues during caries removal13131313. - **Method:**   - Remove the existing restoration and excavate all carious tooth structure using sterile instruments [user].   - For this case of reversible pulpitis where the lesion is not approaching the pulp,   **non-selective (complete) caries removal** is the recommended approach to eliminate infected tissues14.   - - The   **consistency (hardness) of the dentin** should be the primary guide for excavation, as it is more reliable than color15.  **4. Pulp Protection and Definitive Restoration**   - **Pulp Protection:** After complete caries removal, if the remaining dentin over the pulp is deep, place a liner of a **hydraulic calcium silicate-based cement or a glass-ionomer cement**16. - **Immediate and Definitive Restoration:** The tooth must be restored with a permanent, well-sealed restoration **at the earliest opportunity, preferably in the same visit**17. A bonded resin composite restoration is appropriate for this anterior tooth [user]. A high-quality coronal seal is paramount for the long-term success of the treatment18.   **5. Follow-up and Prognosis Assessment**   - **Post-operative Instructions:** Inform the patient that minor, transient post-operative sensitivity is possible but should resolve [user]. Instruct them to return if symptoms become severe, spontaneous, or lingering. - **Follow-Up Schedule:** Recall the patient for evaluation at 6 and 12 months, and then at yearly intervals19191919. - **Success Criteria:** Treatment is considered successful when the tooth remains asymptomatic, responds positively to pulp sensibility tests, and shows no radiographic signs of periapical pathology20202020. |
| 4 | Based on a comparative analysis of the provided clinical recommendations and the patient's case history, the following diagnosis and definitive treatment plan are presented.  **Comparative Diagnosis**  The patient's clinical and radiographic findings point conclusively to a non-vital pulp with an associated infection in the periapical tissues [user]. The lack of response to vitality tests, combined with pain on percussion and a periapical radiolucency, creates a clear diagnostic picture that is consistent across all applicable guidelines.   - **American Association of Endodontists (AAE) Classification:**   - **Pulpal Diagnosis: Pulp Necrosis**. This diagnosis is based on the finding that the pulp is non-responsive to cold and electric pulp testing, indicating death of the dental pulp1.   - **Apical Diagnosis: Symptomatic Apical Periodontitis**. This is determined by the patient's chief complaint of pain on biting, tenderness to percussion, and the radiographic presence of a slight periapical radiolucency [user, 5011, 5012]. This represents an inflammatory reaction in the tissues surrounding the root tip caused by the pulpal infection [user, 5011]. - **Indian Endodontic Society (IES) Position Statement Classification:**   - **Diagnosis: Pulp Necrosis with Apical Periodontitis requiring Pulpectomy**. The IES position statement, which focuses on vital pulp therapy (VPT), explicitly lists the patient's findings—pulp necrosis, radiographic signs of periapical rarefaction, negative responses to vitality tests, and a positive response to percussion—as conditions that are   **not suitable candidates for VPT** and should be managed with pulpectomy (root canal treatment)2.   - **European Society of Endodontology (ESE) Consensus:**   - **Diagnosis: Pulp Necrosis with Apical Periodontitis requiring Pulpectomy**. The ESE guidelines are centered on preserving pulp vitality. Since the pulp is necrotic, vital pulp treatments are contraindicated. The required treatment is a   **Pulpectomy**, which is the total removal of the pulp from the root canal system followed by root canal treatment3.   - **Wolters et al. (Minimally Invasive Endodontics) Philosophy:**   - **Not Applicable**. The classification system proposed by Wolters et al. is a new diagnostic system for assessing different stages of   *pulpitis* in vital teeth4444. As the patient's tooth is non-vital (necrotic), this classification system is not applicable to this case.  Diagnostic Summary:  All relevant guidelines are in complete agreement. The definitive diagnosis for tooth #31 is Pulp Necrosis with Symptomatic Apical Periodontitis. Vital pulp therapy is contraindicated5. The only treatment option to save the tooth is non-surgical root canal treatment.  **Definitive Treatment Plan**  The treatment goal is to disinfect the root canal system, resolve the periapical infection, and restore the tooth to function, thereby alleviating the patient's symptoms.  **1. Informed Consent**   - Discuss the diagnosis with the patient, explaining that the nerve inside the tooth is dead and there is an infection in the bone at the root tip, which is causing the pain on biting [user]. - Explain that the only procedure to save the tooth is a   **nonsurgical root canal treatment (pulpectomy)**6666.   - Present the alternatives, which would be extraction of the tooth. - Discuss the prognosis, procedure steps, and the critical need for a permanent cuspal coverage restoration (crown) after treatment to prevent tooth fracture.   **2. Anesthesia and Aseptic Technique**   - Administer local anesthesia for patient comfort, particularly for dental dam clamp placement. - Isolate the tooth with a   **dental dam**, which is the standard of care and is integral and essential for any nonsurgical endodontic treatment to prevent contamination7777.  3. Nonsurgical Root Canal Treatment (Pulpectomy)  The procedure involves the biologically acceptable chemical and mechanical treatment of the root canal system to promote healing of the periradicular tissues8888.   - **Access Preparation:** Create a standard access cavity through the existing restoration and crown to locate the root canal orifice(s). - **Cleaning and Shaping:** Use endodontic instruments and irrigants (e.g., sodium hypochlorite) to debride and shape the root canal system9. This step removes necrotic tissue, bacteria, and their byproducts, disinfecting the internal tooth structure. - **Obturation:** After thorough cleaning, shaping, and drying, the root canal system is filled and sealed with a biologically acceptable, semi-solid material (e.g., gutta-percha) and a root canal sealer10. The filling should extend as close as possible to the apical constriction of the canal to establish an adequate seal11111111. - **Temporary Restoration:** Place a well-sealed temporary filling material in the access opening immediately after obturation.   **4. Permanent Restoration**   - As soon as possible following the completion of root canal treatment, the tooth must be definitively restored to prevent coronal leakage and fracture12. - For an endodontically treated posterior tooth (premolar or molar), a   **full cuspal protective restoration (e.g., a crown)** is recommended to protect the remaining tooth structure13.  **5. Follow-up and Prognosis Assessment**   - The patient should be recalled for follow-up evaluation to monitor the healing of the periapical tissues14. - **Success Criteria:** A successful outcome is defined by the alleviation of all clinical signs and symptoms (the tooth is no longer tender to biting or percussion) and radiographic evidence of healing of the periapical radiolucency over time15. | Based on a comparative analysis of the provided clinical recommendations and the patient's case history, the following diagnosis and definitive treatment plan are presented.  **Comparative Diagnosis**  The patient's clinical and radiographic findings—no response to vitality tests, pain on percussion, and a visible periapical radiolucency—point to a clear and consistent diagnosis of a non-vital pulp with an established apical infection [user].   - **American Association of Endodontists (AAE) Classification:**   - **Pulpal Diagnosis: Pulp Necrosis**. This diagnosis is definitive, as the pulp is non-responsive to both cold and electric pulp testing, indicating the death of the dental pulp [user, 1135, 1183].   - **Apical Diagnosis: Symptomatic Apical Periodontitis**. This is determined by the combination of clinical symptoms (pain on biting and tenderness to percussion) and radiographic findings (slight periapical radiolucency and loss of lamina dura) [user, 1147]. This represents an inflammation of the apical periodontium that is of pulpal origin [user, 1149]. - **Indian Endodontic Society (IES) Position Statement Classification:**   - **Diagnosis: Pulp Necrosis with Apical Periodontitis**. The IES position statement is focused on vital pulp therapy (VPT)1. This case, with clear signs of pulp necrosis and periapical pathology, is not a candidate for any VPT procedure and requires complete removal of the pulp tissue (pulpectomy)2. - **European Society of Endodontology (ESE) & Wolters et al. Consensus:**   - **Diagnosis: Pulp Necrosis and Apical Periodontitis**. The ESE guidelines for managing deep caries and exposed pulps are predicated on the pulp being vital3. Since the pulp is necrotic, the only treatment option to save the tooth is a pulpectomy. The Wolters et al. classification system for assessing pulpitis is not applicable as it is used for grading inflammation in vital pulps4.   Diagnostic Summary:  There is a clear consensus across all applicable guidelines. The definitive diagnosis is Pulp Necrosis with Symptomatic Apical Periodontitis. Vital pulp therapy is contraindicated, and the only appropriate treatment to retain the tooth is nonsurgical root canal therapy (pulpectomy).  **Definitive Treatment Plan**  The treatment plan must address the necrotic pulp and the associated infection of the periapical tissues. The goal is to disinfect the root canal system and seal it to allow for the healing of the periapical lesion.  **1. Informed Consent and Pre-operative Procedures**   - **Discussion:** Explain the diagnosis to the patient—that the nerve inside the tooth is dead and there is an infection at the root tip causing the pain on biting [user]. - **Treatment Options:** Present nonsurgical root canal treatment as the only option to save the tooth. The alternative is extraction. - **Prognosis:** Discuss the high success rate of root canal treatment when performed to an adequate technical standard and followed by a proper restoration.   2. Nonsurgical Root Canal Treatment (Pulpectomy)  This procedure involves the use of biologically acceptable chemical and mechanical treatment of the root canal system to promote healing and repair of the periradicular tissues5.   - **Anesthesia and Isolation:**   - Administer local anesthesia for patient comfort, as the surrounding tissues may be sensitive despite the pulp being necrotic.   - Isolate the tooth with a **dental dam**. This is the standard of care and is integral and essential for any nonsurgical endodontic treatment to minimize the risk of contamination6666. - **Access and Disinfection:**   - Remove the existing defective restoration and all carious tissue to ensure a clean operating field [user].   - Create an appropriate access cavity to locate all canal orifices.   - Debride, shape, and disinfect the entire root canal system using chemical and mechanical means. - **Obturation and Restoration:**   - Fill (obturate) the cleaned and shaped root canal system with a biologically acceptable semi-solid or solid obturating material (e.g., gutta-percha) and a root canal sealer to establish an adequate seal7. The filling should extend as close as possible to the apical constriction8.   - Place a well-sealed restoration in the access cavity. Given the history of a large restoration, the tooth should be restored as soon as possible with a   **core build-up and a full cuspal coverage restoration (crown)** to prevent coronal leakage and fracture of the remaining tooth structure9999.  **3. Follow-up**   - **Monitoring:** The patient should be recalled for follow-up to evaluate the healing of the periapical tissues. - **Success Assessment:** A successful outcome is defined by the absence of clinical signs and symptoms (pain, swelling) and radiographic evidence of the healing or reduction of the periapical radiolucency, with reformation of a normal periodontal ligament space10. | Based on a comparative analysis of the provided clinical recommendations and the patient's case history, the following diagnosis and definitive treatment plan are presented.  **Comparative Diagnosis**  The patient's clinical and radiographic findings present a clear and consistent picture of a non-vital tooth with associated inflammation of the surrounding apical tissues [user]. The lack of response to vitality tests combined with pain on percussion and radiographic changes leads to a definitive diagnosis across all applicable guidelines.   - **American Association of Endodontists (AAE) Classification:**   - **Pulpal Diagnosis: Pulp Necrosis**. This diagnosis is based on the clinical finding that the pulp is non-responsive to the cold test and the Electric Pulp Test (EPT)1. This indicates the death of the dental pulp, necessitating root canal treatment2.   - **Apical Diagnosis: Symptomatic Apical Periodontitis**. This is determined by the patient's chief complaint of pain on biting, clinical tenderness to percussion, and the presence of a slight periapical radiolucency on the radiograph [user]. The AAE defines this as inflammation of the apical periodontium producing a painful response to biting and/or percussion, which may or may not be accompanied by radiographic changes3. - **Indian Endodontic Society (IES) Position Statement Classification:**   - **Diagnosis: Pulp Necrosis with Symptomatic Apical Periodontitis**. The IES position statement is focused on vital pulp therapy (VPT). This case, presenting with pulp necrosis, radiographic signs of periapical rarefaction, negative responses to vitality tests, and a positive response to percussion, is explicitly identified as   **not a suitable candidate for VPT and should be managed with pulpectomy (root canal treatment)**4.   - **European Society of Endodontology (ESE) Consensus:**   - **Diagnosis: Pulp Necrosis with Apical Periodontitis**. The ESE guidelines for managing deep caries and the exposed pulp are predicated on the presence of a vital pulp. A non-vital tooth with signs of apical pathosis falls outside the scope of VPT5. The recommended treatment for total removal of the pulp from the root canal system is a   **pulpectomy**, followed by root canal treatment6.   - **Wolters et al. (Minimally Invasive Endodontics) Philosophy:**   - **Not Applicable**. The classification system proposed by Wolters et al. is for assessing different stages of   *pulpitis* in vital teeth7777. As the pulp in this case is necrotic, this diagnostic system does not apply.  Diagnostic Summary:  There is a clear consensus among all applicable guidelines. The definitive diagnosis for tooth #31 is Pulp Necrosis with Symptomatic Apical Periodontitis. Vital pulp therapy is contraindicated, and the only appropriate treatment to save the tooth is nonsurgical root canal treatment.  **Definitive Treatment Plan**  The treatment plan aims to disinfect the root canal system, resolve the periapical inflammation, and restore the tooth to proper form and function.  **1. Informed Consent**   - Discuss the diagnosis with the patient, explaining that the nerve inside the tooth is dead and there is an infection in the bone at the tip of the root, which is causing the pain on biting [user]. - Explain the necessity of nonsurgical root canal treatment to resolve the infection and save the tooth. Discuss the procedure, prognosis, and alternatives, including extraction.   2. Nonsurgical Root Canal Treatment (Pulpectomy)  The objective is the "biologically acceptable chemical and mechanical treatment of the root canal system to promote healing and repair of the periradicular tissues"8888.   - **Anesthesia and Isolation:**   - Administer local anesthesia for patient comfort during the procedure.   - Isolate the tooth with a   **dental dam**, which is the "standard of care; it is integral and essential for any nonsurgical endodontic treatment" to minimize the risk of bacterial contamination9999.   - **Procedure Steps:**   1. **Access Cavity Preparation:** Create an adequate opening into the tooth to locate and access the root canal system10.   2. **Cleaning and Shaping:** Use specialized instruments to debride, enlarge, and shape the entire root canal system, removing necrotic tissue, bacteria, and their byproducts11111111.   3. **Disinfection:** Copiously irrigate the canal system with chemical disinfectants (e.g., sodium hypochlorite) to eliminate remaining microorganisms and dissolve organic debris12121212. An intracanal medicament, such as calcium hydroxide, may be placed between appointments for multi-visit treatments.   4. **Obturation:** After thorough cleaning and disinfection, the root canal system is filled and sealed with a biologically acceptable material (e.g., gutta-percha) and a root canal sealer to establish an adequate seal and prevent re-infection13. The filling should extend as close as possible to the apical constriction14.   **3. Definitive Restoration**   - The tooth must be restored   **as soon as possible** following the completion of the root canal treatment to prevent coronal leakage and fracture of the remaining tooth structure15.   - The final restoration for an anterior tooth depends on the amount of remaining coronal structure but may involve a post and core buildup followed by a crown to provide an adequate coronal seal and protect the tooth16.   **4. Follow-up**   - The patient should be recalled for follow-up visits to monitor the healing of the periapical tissues. - A successful outcome is defined by the complete resolution of clinical signs and symptoms (i.e., no more pain on biting) and radiographic evidence of healing [user]. The follow-up radiograph should "optimally demonstrate an intact lamina dura and a normal periodontal ligament space around the root(s) under observation"17. |
| 5 | Based on a comparative analysis of the provided clinical recommendations and the patient's case history, the following diagnosis and definitive treatment plan are presented.  **Comparative Diagnosis**  The patient's clinical presentation is classic for a localized, reversible inflammation of the pulp caused by a carious lesion [user]. The symptoms and findings align consistently across all provided diagnostic systems.   - **American Association of Endodontists (AAE) Classification:**   - **Pulpal Diagnosis: Reversible Pulpitis**1. This diagnosis is based on the finding that the discomfort is not spontaneous, is provoked by a cold stimulus, and "goes away within a couple of seconds following the removal of the stimulus" [user, 603, 605].   - **Apical Diagnosis: Normal Apical Tissues**2. This is determined by the absence of tenderness to percussion or palpation and the normal radiographic appearance of the lamina dura and periodontal ligament space [user, 626]. - **Indian Endodontic Society (IES) Position Statement Classification:**   - **Symptom Classification: Mild symptomatic (indicative of reversible pulpal changes)**3. This category is for symptoms that occur only upon stimulation and are of short duration [user, 3984].   - **Radiographic Depth:** The lesion is described as being confined to the enamel/dentin junction, not extending deep into the dentin [user].   - **Overall Diagnosis: Reversible Pulpitis**4. This is a mild-to-moderate inflammatory condition where the pulp is capable of returning to an uninflamed state after the removal of the stimulus [user, 4074]. - **European Society of Endodontology (ESE) & ORCA/EFCD Consensus:**   - **Pulpal Diagnosis: Reversible Pulpitis**5. This diagnosis is supported by "episodes of less intense, shorter-lasting pain" without spontaneous or lingering symptoms [user, 1458].   - **Lesion Activity: Active Carious Lesion**6. The presence of clinical symptoms (sensitivity) is a key indicator of an "active" lesion, which implies caries progression [user, 4780]. - **Wolters et al. (Minimally Invasive Endodontics) Philosophy:**   - **Diagnosis: Initial Pulpitis**7. This terminology is based on a "Heightened but not lengthened response to the cold test, not sensitive to percussion and no spontaneous pain," which perfectly matches the patient's presentation [user, 108].   Diagnostic Summary:  All guidelines converge on a diagnosis of Reversible Pulpitis with Normal Apical Tissues, caused by an active carious lesion [user]. The prognosis for maintaining pulp vitality is excellent with appropriate treatment [user].  **Definitive Treatment Plan**  The treatment plan focuses on removing the cause of inflammation, preserving pulp vitality, and placing a durable, well-sealed restoration to prevent future bacterial irritation8. Vital pulp therapy procedures such as pulpotomy are not indicated as there is no pulp exposure expected [user].  **1. Patient-Centered Caries Management & Consent**   - **Individual Etiological Assessment:** Before operative treatment, it is recommended to assess and record the patient's individual etiological factors, such as plaque levels, dietary habits (sugar intake), and fluoride use, as they present with an active lesion9. This allows for personalized preventive counseling10. - **Informed Consent:** Discuss the diagnosis, the proposed restorative treatment, and the excellent prognosis with the patient [user]. Inform the patient that endodontic treatment may be indicated in the future, although this is a very low risk11.   **2. Anesthesia and Aseptic Field**   - **Anesthesia:** Administer appropriate local anesthesia for patient comfort [user]. - **Isolation:** The use of a **dental dam is mandatory** and is the standard of care for managing deep or extensive carious lesions to maintain an aseptic field and prevent salivary contamination12121212.   **3. Caries Excavation**   - **Magnification:** The use of magnification with dental loupes or a microscope is recommended for better assessment of the tissues during caries removal13131313. - **Method:**   - Remove the existing restoration and excavate all carious tooth structure using sterile instruments [user].   - For this case of reversible pulpitis where the lesion is small and not approaching the pulp, **non-selective (complete) caries removal** is the recommended approach to eliminate infected tissues [user, 272, 1380].   - The   **consistency (hardness) of the dentin** should be the primary guide for excavation, as it is more reliable than color14.  **4. Definitive Restoration**   - **Pulp Protection:** Given the shallow nature of the lesion (enamel/dentin junction), a separate pulp-capping agent or liner is not required [user]. Modern adhesive systems are sufficient [user]. - **Immediate and Definitive Restoration:** The tooth must be restored with a permanent, well-sealed restoration **at the earliest opportunity, preferably in the same visit**15. A bonded resin composite restoration is appropriate for this anterior tooth [user]. A high-quality coronal seal is paramount for the long-term success of the treatment16.   **5. Follow-up and Prognosis Assessment**   - **Post-operative Instructions:** Inform the patient that minor, transient post-operative sensitivity is possible but should resolve [user]. Instruct them to return if symptoms become severe, spontaneous, or lingering [user]. - **Follow-Up Schedule:** Recall the patient for routine clinical and radiographic evaluation at 6 and 12 months, and then at yearly intervals to monitor pulpal health17171717. - **Success Criteria:** Treatment is considered successful when the tooth remains asymptomatic, responds normally to pulp sensibility tests, and shows no radiographic signs of periapical pathology181818181818181818. | Based on a comparative analysis of the provided clinical recommendations and the patient's case history, the following diagnosis and definitive treatment plan are presented.  **Comparative Diagnosis**  The patient's clinical presentation is a classic example of a localized, reversible inflammation of the pulp caused by a carious lesion [user]. The symptoms and findings align consistently across all provided diagnostic systems.   - **American Association of Endodontists (AAE) Classification:**   - **Pulpal Diagnosis: Reversible Pulpitis**1. This diagnosis is based on the finding that the discomfort is not spontaneous, is provoked by a cold stimulus, and "goes away within a couple of seconds following the removal of the stimulus" [user, 2399].   - **Apical Diagnosis: Normal Apical Tissues**2. This is determined by the absence of tenderness to percussion or palpation and the normal radiographic appearance of the lamina dura and periodontal ligament space [user, 2422]. - **Indian Endodontic Society (IES) Position Statement Classification:**   - **Symptom Classification: Mild symptomatic (indicative of reversible pulpal changes)**3. This category is for symptoms that occur only upon stimulation and are of short duration [user, 3718].   - **Overall Diagnosis: Reversible Pulpitis**4. This is a mild-to-moderate inflammatory condition where the pulp is capable of returning to an uninflamed state following the removal of the stimuli5. - **European Society of Endodontology (ESE) & ORCA/EFCD Consensus:**   - **Pulpal Diagnosis: Reversible Pulpitis**6. The symptoms of shorter-lasting pain without spontaneity are characteristic of reversible pulpitis [user, 4849].   - **Lesion Activity: Active Carious Lesion**7. The presence of clinical symptoms (sensitivity) is an indicator of an "active" lesion, which implies caries progression [user, 1966]. - **Wolters et al. (Minimally Invasive Endodontics) Philosophy:**   - **Diagnosis: Initial Pulpitis** or **Mild Pulpitis**8. This terminology is based on a "Heightened but not lengthened response to the cold test, not sensitive to percussion and no spontaneous pain," which perfectly matches the patient's presentation [user, 4555].   Diagnostic Summary:  All guidelines converge on a diagnosis of Reversible Pulpitis with Normal Apical Tissues, caused by an active carious lesion [user]. The prognosis for maintaining pulp vitality is excellent with appropriate treatment.  **Definitive Treatment Plan**  The treatment plan focuses on removing the cause of inflammation, preserving pulp vitality, and placing a durable, well-sealed restoration to prevent future bacterial irritation.  **1. Patient-Centered Caries Management & Consent**   - **Individual Etiological Assessment:** Before operative treatment, it is recommended to assess and record the patient's individual etiological factors, such as plaque levels, dietary habits (sugar intake), and fluoride use, as they present with an active lesion999999999. This allows for personalized preventive counseling. - **Informed Consent:** Discuss the diagnosis, the proposed restorative treatment, and the excellent prognosis with the patient [user]. Inform the patient that future endodontic treatment is a low risk but possible outcome10.   **2. Anesthesia and Aseptic Field**   - **Anesthesia:** Administer appropriate local anesthesia for patient comfort. - **Isolation:** The use of a **dental dam is mandatory** and is the standard of care for managing deep carious lesions to maintain an aseptic field and prevent salivary contamination1111111111111111.   **3. Caries Excavation**   - **Magnification:** The use of magnification with dental loupes or a microscope is recommended for better assessment of the tissues during caries removal12121212. - **Method:**   - Remove the existing restoration and excavate all carious tooth structure using sterile instruments [user].   - For this case of reversible pulpitis where the lesion is not approaching the pulp, **non-selective (complete) caries removal** is the recommended approach to eliminate infected tissues [user, 594].   - The   **consistency (hardness) of the dentin** should be the primary guide for excavation, as it is more reliable than color13.  **4. Pulp Protection and Definitive Restoration**   - **Pulp Protection:** After complete caries removal, if the remaining dentin is deep, place a liner of a **hydraulic calcium silicate-based cement or a glass-ionomer cement**14. Given the shallow nature of the lesion, this may not be necessary [user]. - **Immediate and Definitive Restoration:** The tooth must be restored with a permanent, well-sealed restoration **at the earliest opportunity, preferably in the same visit**151515151515151515. A bonded resin composite restoration is appropriate for this anterior tooth [user]. A high-quality coronal seal is paramount for the long-term success of the treatment16.   **5. Follow-up and Prognosis Assessment**   - **Post-operative Instructions:** Inform the patient that minor, transient post-operative sensitivity is possible but should resolve [user]. Instruct them to return if symptoms become severe, spontaneous, or lingering. - **Follow-Up Schedule:** Recall the patient for evaluation at 6 and 12 months, and then at yearly intervals171717171717171717. - **Success Criteria:** Treatment is considered successful when the tooth remains asymptomatic, responds positively to pulp sensibility tests, and shows no radiographic signs of periapical pathology18181818181818181818181818181818. | Based on a comparative analysis of the provided clinical recommendations and the patient's case history, the following diagnosis and definitive treatment plan are presented.  **Comparative Diagnosis**  The patient's clinical presentation is a classic example of a vital pulp with a mild, reversible inflammation caused by a carious lesion [user]. The symptoms and findings are consistent across all provided diagnostic systems.   - **American Association of Endodontists (AAE) Classification:**   - **Pulpal Diagnosis: Reversible Pulpitis**1. This diagnosis is based on findings that the discomfort is not spontaneous, is provoked by a cold stimulus, and subsides within a couple of seconds after the stimulus is removed [user, 1763].   - **Apical Diagnosis: Normal Apical Tissues**2. This is determined by the absence of tenderness to percussion or palpation and the normal radiographic appearance of the lamina dura and periodontal ligament space [user, 1786]. - **Indian Endodontic Society (IES) Position Statement Classification:**   - **Symptom Classification: Mild symptomatic (indicative of reversible pulpal changes)**3. This category is for symptoms that are of short duration and occur only upon stimulation [user, 4397].   - **Overall Diagnosis: Reversible Pulpitis**4. This is a mild-to-moderate inflammatory condition where the pulp is capable of returning to an uninflamed state following removal of the stimuli5. - **European Society of Endodontology (ESE) & ORCA/EFCD Consensus:**   - **Pulpal Diagnosis: Reversible Pulpitis**6. The symptoms of shorter-lasting, non-spontaneous pain are characteristic of reversible pulpitis [user, 3482].   - **Lesion Activity: Active Carious Lesion**7. The presence of clinical symptoms (sensitivity) is an indicator of an "active" lesion, signifying net mineral loss over time [user, 1970]. - **Wolters et al. (Minimally Invasive Endodontics) Philosophy:**   - **Diagnosis: Initial Pulpitis** or **Mild Pulpitis**8888. This terminology is based on a "Heightened but not lengthened response to the cold test, not sensitive to percussion and no spontaneous pain," which perfectly matches the patient's presentation [user, 2711].   Diagnostic Summary:  All guidelines converge on a diagnosis of Reversible Pulpitis with Normal Apical Tissues, caused by an active carious lesion [user]. The prognosis for maintaining pulp vitality is excellent with appropriate treatment.  **Definitive Treatment Plan**  The treatment plan is focused on removing the cause of inflammation and placing a durable, well-sealed restoration to prevent future bacterial irritation and allow the pulp to heal [user].  **1. Patient-Centered Caries Management & Consent**   - **Individual Etiological Assessment:** Before operative treatment, it is recommended to assess and record the patient's individual etiological factors, such as plaque levels, dietary habits, and fluoride use, as they present with an active lesion9. This allows for personalized preventive counseling. - **Informed Consent:** Discuss the diagnosis, the proposed restorative treatment, and the excellent prognosis with the patient [user]. Inform the patient that endodontic treatment may be indicated in the future, although this is a very low risk10.   **2. Anesthesia and Aseptic Field**   - **Anesthesia:** Administer appropriate local anesthesia for patient comfort. - **Isolation:** The use of a **dental dam is mandatory** and is the standard of care for managing deep carious lesions to maintain an aseptic field and prevent salivary contamination111111111111111111.   **3. Caries Excavation**   - **Magnification:** The use of magnification with dental loupes or a microscope is recommended for better assessment of the tissues during caries removal12. - **Method:**   - Remove the existing restoration and excavate all carious tooth structure using sterile instruments [user].   - For this case of reversible pulpitis where the lesion is not approaching the pulp, **non-selective (complete) caries removal** is the recommended approach to eliminate infected tissues [user, 2359, 3362].   - The   **consistency (hardness) of the dentin** should be the primary guide for excavation, as it is more reliable than color13.  **4. Definitive Restoration**   - **Pulp Protection:** Since the carious lesion is not deep, a separate pulp capping liner is not required [user]. A modern adhesive system is sufficient. - **Immediate and Definitive Restoration:** The tooth must be restored with a permanent, well-sealed restoration **at the earliest opportunity, preferably in the same visit**14. A bonded resin composite restoration is appropriate for this anterior tooth to restore form, function, and esthetics [user].   **5. Follow-up and Prognosis Assessment**   - **Post-operative Instructions:** Inform the patient that minor, transient post-operative sensitivity is possible but should resolve [user]. Instruct them to return if symptoms become severe, spontaneous, or lingering. - **Follow-Up Schedule:** Recall the patient for evaluation at 6 and 12 months, and then at yearly intervals15. - **Success Criteria:** Treatment is considered successful when the tooth remains asymptomatic, responds positively to pulp sensibility tests, and shows no radiographic signs of periapical pathology16. |
| 6 | Based on a comparative analysis of the provided clinical recommendations and the patient's case history, the following diagnosis and definitive treatment plan are presented.  **Comparative Diagnosis**  The patient's clinical presentation, characterized by lingering pain to thermal stimuli, pain on percussion, and radiographic evidence of PDL widening, provides a clear and consistent diagnosis of an advanced inflammatory state that is beyond the pulp's ability to heal [user].   - **American Association of Endodontists (AAE) Classification:**   - **Pulpal Diagnosis: Symptomatic Irreversible Pulpitis**. This diagnosis is based on subjective and objective findings that the vital inflamed pulp is incapable of healing [user, 4312]. The key characteristics present in this case are a sharp, lingering pain to thermal stimulus that lasts several seconds after removal and tenderness to percussion [user, 4313, 918, 920].   - **Apical Diagnosis: Symptomatic Apical Periodontitis**. This is determined by the patient's report of pain upon biting, the clinical finding of tenderness to percussion, and the radiographic evidence of a slight widening of the PDL space [user, 4332, 4333]. - **Indian Endodontic Society (IES) Position Statement Classification:**   - **Symptom Classification: Severe symptomatic (indicative of irreversible pulpal changes)**. This is characterized by pain that persists for longer periods after a stimulus is removed and an excruciating, lingering response to thermal tests [user, 3495, 3492].   - **Overall Diagnosis: Complete Irreversible Pulpitis**. The IES position statement indicates that teeth exhibiting signs of complete irreversible pulpitis, including a positive response to percussion and severe symptoms, are not suitable candidates for vital pulp therapy and should be managed with a pulpectomy [user, 3585, 3679]. - **European Society of Endodontology (ESE) & Wolters et al. Consensus:**   - **Diagnosis: Severe Pulpitis / Irreversible Pulpitis**. The symptoms of a strong, prolonged reaction to thermal stimuli and a tooth that is very sensitive to percussion fit the description of **Severe Pulpitis** [user, 5018, 5017]. The ESE recommends that carious exposure with symptoms indicative of irreversible pulpitis should be treated with a **pulpectomy** [user, 4691].   Diagnostic Summary:  All applicable guidelines unanimously indicate that the tooth has an irreversibly inflamed pulp with inflammation extending into the periapical tissues. The definitive diagnosis for tooth #34 is Symptomatic Irreversible Pulpitis with Symptomatic Apical Periodontitis. Vital pulp therapy is contraindicated, and the only appropriate treatment to save the tooth is nonsurgical root canal treatment.  **Definitive Treatment Plan**  The treatment plan aims to remove the irreversibly inflamed pulp tissue, disinfect the root canal system to allow for the resolution of the apical inflammation, and restore the tooth to proper form and function [user].  **1. Informed Consent**   - Discuss the diagnosis with the patient, explaining that the nerve inside the tooth is irreversibly inflamed and that the inflammation has spread to the ligament around the root tip, causing pain on biting [user]. - Explain the necessity of **nonsurgical root canal treatment (pulpectomy)** to resolve the condition and save the tooth. Discuss the procedure, prognosis, and alternatives, including extraction.   2. Nonsurgical Root Canal Treatment (Pulpectomy)  The objective is the "biologically acceptable chemical and mechanical treatment of the root canal system to promote healing and repair of the periradicular tissues".   - **Anesthesia and Isolation:**   - Administer profound local anesthesia.   - Isolate the tooth with a **dental dam**, which is the "standard of care; it is integral and essential for any nonsurgical endodontic treatment" to minimize the risk of bacterial contamination. - **Procedure Steps:**   1. **Access Cavity Preparation:** Create an adequate opening into the tooth to locate and access the root canal system.   2. **Cleaning and Shaping:** Use specialized instruments to debride, enlarge, and shape the entire root canal system, removing all inflamed pulp tissue, bacteria, and their byproducts.   3. **Disinfection:** Copiously irrigate the canal system with chemical disinfectants (e.g., sodium hypochlorite) to eliminate remaining microorganisms and dissolve organic debris.   4. **Obturation:** After thorough cleaning and disinfection, the root canal system is filled and sealed with a biologically acceptable material (e.g., gutta-percha) and a root canal sealer to establish an adequate seal and prevent re-infection. The filling should extend as close as possible to the apical constriction.   **3. Definitive Restoration**   - The tooth must be restored **as soon as possible** following the completion of the root canal treatment to prevent coronal leakage and fracture of the remaining tooth structure. - Given the presence of a large existing restoration, the final restoration will likely require a **core build-up, possibly with a post for retention, followed by a full cuspal coverage restoration (crown)** to protect the remaining tooth structure from fracture.   **4. Follow-up**   - The patient should be recalled for follow-up visits to monitor the healing of the periapical tissues. - A successful outcome is defined by the complete resolution of clinical signs and symptoms (i.e., no pain on chewing or percussion) and radiographic evidence of healing, including the resolution of the PDL widening and the re-establishment of an intact lamina dura. | Based on a comparative analysis of the provided clinical recommendations and the patient's case history, the following diagnosis and definitive treatment plan are presented.  **Comparative Diagnosis**  The patient's clinical presentation, including a dull ache after chewing, lingering sensitivity to thermal stimuli, and tenderness to percussion, provides a clear and consistent diagnosis across all applicable guidelines [user]. The combination of these symptoms points definitively to an irreversibly inflamed pulp with early signs of periapical inflammation.   - **American Association of Endodontists (AAE) Classification:**   - **Pulpal Diagnosis: Symptomatic Irreversible Pulpitis**. This diagnosis is based on the key findings of a sharp, lingering pain in response to thermal stimuli that lasts for several seconds after the stimulus is removed [user, 1765].   - **Apical Diagnosis: Symptomatic Apical Periodontitis**. This is determined by the patient's report of pain upon chewing, clinical tenderness to percussion, and the slight widening of the periodontal ligament (PDL) space seen on the radiograph [user, 3156, 1763]. - **Indian Endodontic Society (IES) Position Statement Classification:**   - **Symptom Classification: Severe symptomatic (indicative of irreversible pulpal changes)**. This is characterized by symptoms that are severe, persist for longer periods after a stimulus is removed, and may be spontaneous [user, 2442, 2439]. An exaggerated, lingering response to vitality tests confirms this classification.   - **Overall Diagnosis: Complete Irreversible Pulpitis**. The IES position statement indicates that teeth with signs of complete irreversible pulpitis, such as a positive response to percussion and severe symptoms, are not suitable candidates for vital pulp therapy and should be managed with pulpectomy. - **European Society of Endodontology (ESE) Consensus:**   - **Pulpal Diagnosis: Irreversible Pulpitis**. The ESE guidelines define irreversible damage as being "characterized by spontaneous, radiating pain that lingers after removal of the stimulus," which aligns with the patient's symptoms [user, 2981]. The ESE recommends that teeth with symptoms indicative of irreversible pulpitis should be treated with pulpectomy. - **Wolters et al. (Minimally Invasive Endodontics) Philosophy:**   - **Diagnosis: Severe Pulpitis**. This classification is for cases with severe spontaneous pain and a clear pain reaction to both warmth and cold stimuli, often with sharp to dull throbbing pain [user]. The presence of percussion sensitivity is also consistent with this diagnosis [user, 2711]. This stage of inflammation often extends into the root canals, making pulpectomy necessary.   Diagnostic Summary:  All guidelines unanimously indicate that the tooth has an irreversibly inflamed pulp with inflammation extending into the periapical tissues. The definitive diagnosis is Symptomatic Irreversible Pulpitis with Symptomatic Apical Periodontitis. Given these findings, vital pulp therapy is contraindicated, and the only predictable treatment to save the tooth is nonsurgical root canal treatment.  **Definitive Treatment Plan**  The treatment plan is designed to definitively resolve the pulpal and periapical pathology by completely removing the inflamed pulp tissue, disinfecting the root canal system, and sealing it from bacterial re-entry.  **1. Informed Consent**   - Discuss the diagnosis with the patient, explaining that the nerve inside the tooth is irreversibly inflamed and that the inflammation has spread to the ligament around the root, causing the pain on biting [user]. - Explain the necessity of **nonsurgical root canal treatment (pulpectomy)** to resolve the infection and pain, and to save the tooth. - Discuss the procedure, prognosis, and alternatives, including extraction.   2. Nonsurgical Root Canal Treatment (Pulpectomy)  The objective is the "biologically acceptable chemical and mechanical treatment of the root canal system to promote healing and repair of the periradicular tissues".   - **Anesthesia and Isolation:**   - Administer profound local anesthesia.   - Isolate the tooth with a **dental dam**, which is the "standard of care; it is integral and essential for any nonsurgical endodontic treatment" to prevent bacterial contamination. - **Procedure Steps:**   1. **Access Cavity and Pulpectomy:** Create an access opening into the pulp chamber and perform a pulpectomy, which is the "surgical removal of the entire pulp tissue".   2. **Cleaning and Shaping:** Use specialized instruments to thoroughly clean and shape the entire root canal system from the orifice to the apical constriction.   3. **Disinfection:** Use chemical irrigants (e.g., sodium hypochlorite) to disinfect the root canal system, dissolving remaining tissue and eliminating bacteria.   4. **Obturation:** After the canal system is cleaned and dried, it should be filled with a biologically acceptable, semi-solid material (e.g., gutta-percha) and a root canal sealer to establish an adequate seal.   **3. Definitive Restoration**   - The tooth must be restored **as soon as possible** after root canal treatment to provide a coronal seal and prevent fracture. - For a posterior tooth with a large existing restoration and significant caries, a core buildup followed by a **full cuspal coverage restoration** (e.g., a crown) is indicated to protect the remaining tooth structure.   **4. Follow-up**   - Schedule follow-up visits to monitor the healing of the periapical tissues. - A successful outcome is defined by the complete resolution of clinical symptoms (no pain on chewing or percussion) and radiographic evidence of healing [user]. The follow-up radiograph should optimally demonstrate the resolution of the PDL widening and the presence of an intact lamina dura around the root. | Based on a comparative analysis of the provided clinical recommendations and the patient's case history, the following diagnosis and definitive treatment plan are presented.  **Comparative Diagnosis**  The patient's clinical presentation, characterized by lingering pain to thermal stimuli and pain on percussion, points conclusively to an advanced state of pulpal and periapical inflammation [user]. There is a clear consensus across all applicable guidelines.   - **American Association of Endodontists (AAE) Classification:**   - **Pulpal Diagnosis: Symptomatic Irreversible Pulpitis**. This diagnosis is based on the patient's report of a sharp, prolonged response to hot/cold stimuli [user]. The AAE defines this condition by characteristics that include sharp pain upon thermal stimulus and lingering pain (often 30 seconds or longer) after the stimulus is removed1.   - **Apical Diagnosis: Symptomatic Apical Periodontitis**. This is determined by the tenderness to percussion and the slight widening of the periodontal ligament (PDL) space visible on the radiograph [user]. This diagnosis represents inflammation of the apical periodontium producing a painful response to biting and/or percussion, which may be accompanied by radiographic changes like a widened PDL2. - **Indian Endodontic Society (IES) Position Statement Classification:**   - **Symptom Classification: Severe symptomatic (indicative of irreversible pulpal changes)**. This is based on the patient's symptoms persisting for longer periods, even after a stimulus is removed [user, 2623].   - **Overall Diagnosis: Complete Irreversible Pulpitis (extending into the radicular pulp)**. Given the severe symptoms and signs of apical inflammation (tenderness to percussion), the IES classifies this as a persistent inflammatory condition involving both the coronal and radicular pulp, for which   **pulpectomy is the treatment of choice**3.   - **European Society of Endodontology (ESE) & Wolters et al. Consensus:**   - **Diagnosis (ESE): Irreversible Pulpitis**. The ESE states that irreversible damage is characterized by spontaneous, radiating pain that lingers after removal of the stimulus4444. The tenderness to percussion and PDL widening further confirm this diagnosis [user].   - **Diagnosis (Wolters et al.): Severe Pulpitis**. This classification is for cases with "severe spontaneous pain and clear pain reaction to warmth and cold stimuli... Tooth is very sensitive to touch and percussion"5. This aligns with the patient's clinical findings [user].   Diagnostic Summary:  All guidelines unanimously indicate that the tooth has a vital but irreversibly inflamed pulp with inflammation extending into the periapical tissues. The definitive diagnosis is Symptomatic Irreversible Pulpitis with Symptomatic Apical Periodontitis. Vital pulp therapy is contraindicated, and nonsurgical root canal treatment is the required standard of care.  **Definitive Treatment Plan**  The only definitive treatment to resolve the patient's symptoms and save the tooth is nonsurgical root canal treatment (pulpectomy) to remove the inflamed tissue and disinfect the root canal system.  **1. Informed Consent**   - Discuss the diagnosis with the patient, explaining that the nerve tissue inside the tooth is irreversibly inflamed and that the inflammation has spread to the ligament around the root tip, causing the pain on biting [user]. - Explain the necessity of nonsurgical root canal treatment to resolve the infection and save the tooth6666. Discuss the procedure, prognosis, and alternatives, including extraction.   2. Nonsurgical Root Canal Treatment (Pulpectomy)  The objective is the "biologically acceptable chemical and mechanical treatment of the root canal system to promote healing and repair of the periradicular tissues"7.   - **Anesthesia and Isolation:**   - Administer profound local anesthesia for patient comfort.   - Isolate the tooth with a   **dental dam**, which is the "standard of care; it is integral and essential for any nonsurgical endodontic treatment" to minimize the risk of bacterial contamination8.   - **Procedure Steps:**   1. **Access Cavity Preparation:** Create an adequate opening into the tooth to locate and access the root canal system9.   2. **Cleaning and Shaping:** Use specialized instruments to debride, enlarge, and shape the entire root canal system, removing the inflamed pulp tissue, bacteria, and their byproducts101010.   3. **Disinfection:** Copiously irrigate the canal system with chemical disinfectants (e.g., sodium hypochlorite) to eliminate remaining microorganisms and dissolve organic debris11. An intracanal medicament, such as calcium hydroxide, may be placed between appointments for multi-visit treatments.   4. **Obturation:** After thorough cleaning and disinfection, the root canal system is filled and sealed with a biologically acceptable material (e.g., gutta-percha) and a root canal sealer to establish an adequate seal and prevent re-infection12. The filling should extend as close as possible to the apical constriction13.   **3. Definitive Restoration**   - The tooth must be restored   **as soon as possible** following the completion of the root canal treatment to prevent coronal leakage and fracture of the remaining tooth structure14.   - Given the presence of a large existing restoration, the final restoration will likely require a core buildup and a   **full cuspal protective restoration** (e.g., a crown) to protect the remaining tooth structure and provide a coronal seal15.  **4. Follow-up**   - The patient should be recalled for follow-up visits to monitor the healing of the periapical tissues. - A successful outcome is defined by the complete resolution of clinical signs and symptoms (i.e., no more pain on biting or thermal sensitivity) and radiographic evidence of healing of the widened PDL space, with the subsequent appearance of an intact lamina dura [user, 1295]. |
| 7 | Based on a comparative analysis of the provided clinical recommendations and the patient's case history, the following diagnosis and definitive treatment plan are presented.  **Comparative Diagnosis**  The patient's clinical and radiographic findings—notably the lack of response to vitality testing, the presence of a draining sinus tract, and a periapical radiolucency—point definitively to a non-vital tooth with a chronic infection [user]. The patient's chief complaint of "cold sensitivity" is likely a misinterpretation, possibly referring to a sensation from adjacent teeth or the sinus tract itself, as the tooth in question is necrotic.   - **American Association of Endodontists (AAE) Classification:**   - **Pulpal Diagnosis: Pulp Necrosis**. This diagnosis is based on the clinical finding that the pulp is non-responsive to the cold test and the Electric Pulp Test (EPT), indicating the death of the dental pulp [user, 4999].   - **Apical Diagnosis: Chronic Apical Abscess**. This is determined by the presence of a draining sinus tract, a large periapical radiolucency, and little to no discomfort [user, 5016]. The AAE defines this as an inflammatory reaction to pulpal infection and necrosis characterized by gradual onset and an intermittent discharge of pus through an associated sinus tract1. - **Indian Endodontic Society (IES) Position Statement Classification:**   - **Diagnosis: Pulp Necrosis with Chronic Apical Abscess**. The IES position statement is focused on vital pulp therapy (VPT). This case, presenting with pulp necrosis, radiographic signs of periapical rarefaction, and negative responses to vitality tests, is explicitly identified as   **not a suitable candidate for VPT and should be managed with pulpectomy (root canal treatment)**2.   - **European Society of Endodontology (ESE) Consensus:**   - **Diagnosis: Pulp Necrosis with Apical Periodontitis**. The ESE guidelines for managing deep caries are predicated on the presence of a vital pulp3. A non-vital tooth with signs of apical pathosis, such as a periapical radiolucency, falls outside the scope of VPT4. The recommended treatment for total removal of the pulp from the root canal system is a   **pulpectomy**, followed by root canal treatment5.   - **Wolters et al. (Minimally Invasive Endodontics) Philosophy:**   - **Not Applicable**. The classification system proposed by Wolters et al. is for assessing different stages of   *pulpitis* in vital teeth6666. As the pulp in this case is necrotic, this diagnostic system does not apply [user].  Diagnostic Summary:  All applicable guidelines unanimously indicate that the tooth is non-vital and has a chronic infection that has perforated the buccal bone to form a sinus tract. The definitive diagnosis is Pulp Necrosis with a Chronic Apical Abscess. Vital pulp therapy is contraindicated, and nonsurgical root canal treatment is the only appropriate course of action to save the tooth.  **Definitive Treatment Plan**  The treatment plan aims to disinfect the root canal system, resolve the chronic periapical infection and associated sinus tract, and restore the tooth to proper form and function.  **1. Informed Consent**   - Discuss the diagnosis with the patient, explaining that the nerve inside the tooth is dead and a chronic, low-grade infection in the bone has created a drainage pathway (the "pimple-like" bump) through the gums [user]. - Explain the necessity of nonsurgical root canal treatment to resolve the infection and save the tooth. Discuss the procedure, prognosis, and alternatives, including extraction.   2. Nonsurgical Root Canal Treatment (Pulpectomy)  The objective is the "biologically acceptable chemical and mechanical treatment of the root canal system to promote healing and repair of the periradicular tissues"7.   - **Anesthesia and Isolation:**   - Administer local anesthesia for patient comfort.   - Isolate the tooth with a   **dental dam**, which is the "standard of care; it is integral and essential for any nonsurgical endodontic treatment" to minimize the risk of bacterial contamination8.   - **Procedure Steps:**   1. **Access Cavity Preparation:** Create an adequate opening into the tooth to locate and access the root canal system.   2. **Cleaning and Shaping:** Use specialized instruments to debride, enlarge, and shape the entire root canal system, removing necrotic tissue, bacteria, and their byproducts.   3. **Disinfection:** Copiously irrigate the canal system with chemical disinfectants (e.g., sodium hypochlorite) to eliminate remaining microorganisms and dissolve organic debris. An intracanal medicament, such as calcium hydroxide, may be placed between appointments for multi-visit treatments to aid in disinfection.   4. **Obturation:** After thorough cleaning and disinfection, the root canal system is filled and sealed with a biologically acceptable material (e.g., gutta-percha) and a root canal sealer to establish an adequate seal and prevent re-infection9. The filling should extend as close as possible to the apical constriction10.   **3. Definitive Restoration**   - The tooth must be restored   **as soon as possible** following the completion of the root canal treatment to prevent coronal leakage and fracture of the remaining tooth structure11.   - For a posterior tooth, a   **full cuspal protective restoration** (e.g., a crown) is recommended after the placement of a core buildup to protect the tooth from occlusal forces12.  **4. Follow-up**   - The patient should be recalled for follow-up visits to monitor healing. - A successful outcome is defined by the complete resolution of the sinus tract and other clinical signs, and radiographic evidence of healing of the periapical radiolucency [user, 1295]. The follow-up radiograph should "optimally demonstrate an intact lamina dura and a normal periodontal ligament space around the root(s) under observation"13. | Based on a comparative analysis of the provided clinical recommendations and the patient's case history, the following diagnosis and definitive treatment plan are presented.  **Comparative Diagnosis**  The patient's clinical and radiographic findings—a non-responsive pulp, a draining sinus tract, and a large periapical radiolucency—point to a clear and consistent diagnosis of a chronic, non-vital tooth infection [user]. The patient's reported "cold sensitivity" is likely a misinterpretation, possibly referred from an adjacent tooth, as the vitality tests conclusively show the pulp in tooth #3 is necrotic [user].   - **American Association of Endodontists (AAE) Classification:**   - **Pulpal Diagnosis: Pulp Necrosis**. This diagnosis is based on the clinical finding that the pulp is non-responsive to the cold test and the Electric Pulp Test (EPT)1. This indicates the death of the dental pulp, necessitating root canal treatment2.   - **Apical Diagnosis: Chronic Apical Abscess**. This is an inflammatory reaction to pulpal infection and necrosis characterized by gradual onset, little or no discomfort (due to drainage), and an intermittent discharge of pus through an associated sinus tract3. The presence of a "pimple-like" bump (sinus tract) and the large periapical radiolucency on the radiograph are classic signs of this condition [user, 4729, 4730]. The slight tenderness to percussion is also consistent with this diagnosis [user]. - **Indian Endodontic Society (IES) Position Statement Classification:**   - **Diagnosis: Pulp Necrosis with Chronic Apical Abscess**. The IES position statement is focused on vital pulp therapy (VPT)4. This case, presenting with pulp necrosis, a sinus tract, and radiographic signs of periapical rarefaction, is explicitly identified as   **not a suitable candidate for VPT and should be managed with pulpectomy (root canal treatment)**5.   - **European Society of Endodontology (ESE) Consensus:**   - **Diagnosis: Pulp Necrosis with Apical Periodontitis**. The ESE guidelines for managing vital pulps are not applicable here6. A non-vital tooth with signs of apical pathosis, such as a periapical lesion, requires total removal of the pulp from the root canal system, a procedure defined as a   **pulpectomy**, followed by root canal treatment7.   - **Wolters et al. (Minimally Invasive Endodontics) Philosophy:**   - **Not Applicable**. The classification system proposed by Wolters et al. is for assessing different stages of   *pulpitis* in vital teeth8. As the pulp in this case is necrotic, this diagnostic system does not apply [user].  Diagnostic Summary:  All applicable guidelines unanimously indicate a non-vital tooth with a chronic, draining infection in the surrounding bone. The definitive diagnosis for tooth #3 is Pulp Necrosis with a Chronic Apical Abscess. Vital pulp therapy is contraindicated.  **Definitive Treatment Plan**  The only definitive treatment to resolve the infection, eliminate the sinus tract, and save the tooth is nonsurgical root canal treatment.  **1. Informed Consent**   - Discuss the diagnosis with the patient, explaining that the nerve inside the tooth is dead and a chronic infection in the bone has created a drainage path (the "pimple") onto the gums [user]. - Explain the necessity of nonsurgical root canal treatment to disinfect the tooth and allow the body to heal the bone. Discuss the procedure, prognosis, and alternatives, including extraction.   2. Nonsurgical Root Canal Treatment (Pulpectomy)  The objective is the "biologically acceptable chemical and mechanical treatment of the root canal system to promote healing and repair of the periradicular tissues"9.   - **Anesthesia and Isolation:**   - Administer local anesthesia for patient comfort.   - Isolate the tooth with a   **dental dam**, which is the "standard of care; it is integral and essential for any nonsurgical endodontic treatment" to minimize the risk of bacterial contamination10101010.   - **Procedure Steps:**   1. **Sinus Tract Tracing:** To confirm the source of the infection, carefully place a gutta-percha cone into the sinus tract stoma until it stops and take a radiograph11.   2. **Access Cavity Preparation:** Create an adequate opening into the tooth to locate and access all root canal systems.   3. **Cleaning and Shaping:** Use specialized instruments to debride, enlarge, and shape the entire root canal system, removing necrotic tissue and bacteria.   4. **Disinfection:** Copiously irrigate the canal system with chemical disinfectants (e.g., sodium hypochlorite) to eliminate remaining microorganisms and dissolve organic debris. For a necrotic case with a periapical lesion, a multi-visit approach with an intracanal medicament like calcium hydroxide is often recommended to aid in disinfection between appointments.   5. **Obturation:** After thorough cleaning and disinfection, the root canal system is filled and sealed with a biologically acceptable material (e.g., gutta-percha) and a root canal sealer to establish an adequate seal and prevent re-infection. The filling should extend as close as possible to the apical constriction12.   **3. Definitive Restoration**   - The tooth must be restored   **as soon as possible** following the completion of the root canal treatment to prevent coronal leakage and fracture of the remaining tooth structure13.   - For a posterior molar tooth, a   **full cuspal protective restoration** (e.g., a crown) is recommended after a core buildup14.  **4. Follow-up**   - The sinus tract should resolve shortly after disinfection of the canal system. Schedule follow-up visits to monitor healing. - A successful outcome is defined by the complete resolution of the sinus tract and other clinical signs/symptoms, and radiographic evidence of healing (bone fill) of the periapical radiolucency over time15. The follow-up radiograph should "optimally demonstrate an intact lamina dura and a normal periodontal ligament space around the root(s) under observation"16. | Based on a comparative analysis of the provided clinical recommendations and the patient's case history, the following diagnosis and definitive treatment plan are presented.  **Comparative Diagnosis**  The patient's objective clinical and radiographic findings—a non-responsive pulp, a draining sinus tract, and a large periapical radiolucency—are definitive and override the subjective report of cold sensitivity, which is likely referred from an adjacent tooth [user]. The diagnosis is consistent across all applicable guidelines.   - **American Association of Endodontists (AAE) Classification:**   - **Pulpal Diagnosis: Pulp Necrosis**. This diagnosis is based on the conclusive finding that the pulp is non-responsive to both the cold test and the Electric Pulp Test (EPT), indicating the death of the dental pulp [user, 1783, 2275].   - **Apical Diagnosis: Chronic Apical Abscess**. This diagnosis is determined by the presence of a draining sinus tract, which is the hallmark of this condition [user, 2275]. The AAE defines it as an inflammatory reaction to pulpal infection and necrosis characterized by gradual onset, little or no discomfort, and an intermittent discharge of pus through a sinus tract [user, 2275]. The large, well-defined periapical radiolucency is also a classic sign of this chronic condition [user, 2275]. - **Indian Endodontic Society (IES) Position Statement Classification:**   - **Diagnosis: Pulp Necrosis with Chronic Apical Abscess**. The IES position statement is focused on vital pulp therapy (VPT). This case, presenting with pulp necrosis, radiographic signs of periapical rarefaction, a sinus tract, and negative responses to vitality tests, is explicitly identified as **not a suitable candidate for VPT and should be managed with pulpectomy (root canal treatment)** [user, 1788]. - **European Society of Endodontology (ESE) Consensus:**   - **Diagnosis: Pulp Necrosis with Apical Periodontitis**. The ESE guidelines for managing deep caries and the exposed pulp are predicated on the presence of a vital pulp. A non-vital tooth with signs of apical pathosis, such as a periapical radiolucency and a sinus tract, falls outside the scope of VPT [user, 3073, 4296]. The recommended treatment for the total removal of the pulp from the root canal system is a **pulpectomy**, followed by root canal treatment. - **Wolters et al. (Minimally Invasive Endodontics) Philosophy:**   - **Not Applicable**. The classification system proposed by Wolters et al. is for assessing different stages of *pulpitis* in vital teeth [user, 2711]. As the pulp in this case is necrotic, this diagnostic system does not apply.   Diagnostic Summary:  All applicable guidelines unanimously indicate a non-vital tooth with a long-standing, chronic, and draining infection in the surrounding bone. The definitive diagnosis is Pulp Necrosis with Chronic Apical Abscess. Vital pulp therapy is contraindicated.  **Definitive Treatment Plan**  The only definitive treatment to resolve the chronic infection, promote healing of the periapical lesion, and save the tooth is nonsurgical root canal treatment.  **1. Informed Consent**   - Discuss the diagnosis with the patient, explaining that the nerve inside the tooth is dead and has led to a chronic infection in the bone, which has created a draining pathway (the "pimple") on the gums [user]. Clarify that the reported cold sensitivity is likely referred from a neighboring tooth and that tooth #3 is the source of the infection. - Explain the necessity of nonsurgical root canal treatment to resolve the infection and save the tooth. Discuss the procedure, prognosis, and alternatives, including extraction.   2. Nonsurgical Root Canal Treatment (Pulpectomy)  The objective is the "biologically acceptable chemical and mechanical treatment of the root canal system to promote healing and repair of the periradicular tissues".   - **Anesthesia and Isolation:**   - Administer local anesthesia for patient comfort.   - Isolate the tooth with a **dental dam**, which is the "standard of care; it is integral and essential for any nonsurgical endodontic treatment" to minimize the risk of bacterial contamination. - **Procedure Steps:**   1. **Access Cavity Preparation:** Create an adequate opening into the tooth to locate and access the root canal system.   2. **Cleaning and Shaping:** Use specialized instruments to debride, enlarge, and shape the entire root canal system, removing necrotic tissue and bacteria.   3. **Disinfection:** Copiously irrigate the canal system with chemical disinfectants (e.g., sodium hypochlorite) to eliminate microorganisms. Placement of an intracanal medicament, such as calcium hydroxide, between appointments is often recommended for necrotic cases with periapical lesions to aid in disinfection.   4. **Obturation:** After thorough cleaning and disinfection, the root canal system is filled and sealed with a biologically acceptable material (e.g., gutta-percha) and a root canal sealer to establish an adequate seal and prevent re-infection.   **3. Definitive Restoration**   - The tooth must be restored **as soon as possible** following the completion of the root canal treatment to prevent coronal leakage and fracture of the remaining tooth structure. - For a molar tooth, the final restoration will require a core buildup and a **full cuspal protective restoration** (e.g., a crown) to protect the remaining tooth structure and provide an adequate coronal seal.   **4. Follow-up**   - The patient should be recalled for follow-up visits to monitor the healing of the periapical lesion. - A successful outcome is defined by the complete resolution of clinical signs and symptoms (disappearance of the sinus tract, no tenderness) and radiographic evidence of healing of the periapical radiolucency [user, 1295]. The follow-up radiograph should "optimally demonstrate an intact lamina dura and a normal periodontal ligament space around the root(s) under observation". |
| 8 | Based on a comparative analysis of the provided clinical recommendations and the patient's case history, the following diagnosis and definitive treatment plan are presented.  **Comparative Diagnosis**  The patient's clinical presentation, characterized by pain on biting and percussion alongside non-lingering thermal sensitivity, indicates a vital pulp where the inflammation has progressed to involve the periapical tissues [user]. This combination of findings leads to a consistent diagnosis of an irreversible condition across all applicable guidelines.   - **American Association of Endodontists (AAE) Classification:**   - **Pulpal Diagnosis: Symptomatic Irreversible Pulpitis**. Although the thermal pain is not described as lingering, the presence of tenderness to percussion is a key finding [user]. The AAE Position Statement on Vital Pulp Therapy states that when percussion pain is present, "the pulp is considered to be in an irreversibly inflamed state"1. The AAE also notes that severe pain to percussion is "highly indicative of a degenerating pulp and root canal treatment is needed"2.   - **Apical Diagnosis: Symptomatic Apical Periodontitis**. This diagnosis is based directly on the patient's report of pain upon chewing, the clinical finding of tenderness to percussion, and the radiographic evidence of a slight widening of the PDL space [user, 341]. - **Indian Endodontic Society (IES) Position Statement Classification:**   - **Diagnosis: Partial Irreversible Pulpitis (restricted to the coronal pulp)**. While the non-lingering thermal symptoms align with "Mild symptomatic (indicative of reversible pulpal changes)" 3, the IES states that teeth with a positive response to percussion are not suitable for the most conservative vital pulp therapies and should be managed with pulpotomy or pulpectomy444. This indicates the inflammation has extended apically, fitting the description of a partial irreversible pulpitis. - **European Society of Endodontology (ESE) & Wolters et al. Consensus:**   - **Diagnosis (ESE): Irreversible Pulpitis**. The ESE states that irreversible damage can be indicated by a heightened response to thermal testing combined with other signs like tenderness to percussion [user, 1464]. The presence of percussion sensitivity and PDL widening are strong indicators that the inflammation is significant and has extended beyond the pulp chamber [user, 1361].   - **Diagnosis (Wolters et al.): Mild to Moderate Pulpitis**. The patient's non-lingering cold response combined with being "percussion sensitive" fits the description of   **Mild Pulpitis**5555. However, the additional finding of a widened PDL may suggest a more advanced stage, such as  **Moderate Pulpitis**, which is also described as "possibly percussion sensitive"6.  Diagnostic Summary:  All guidelines indicate that although the pulp is vital, the inflammation is irreversible and has extended into the periradicular tissues, causing symptomatic apical periodontitis [user, 341]. The definitive diagnosis is  **Symptomatic Irreversible Pulpitis with Symptomatic Apical Periodontitis**7777. While traditionally this diagnosis mandated root canal treatment, modern guidelines now recognize full pulpotomy as a potential treatment, contingent on intra-operative assessment888888888.  **Definitive Treatment Plan**  The treatment plan must address the irreversible nature of the pulpal inflammation. The evidence-based approach is to attempt a full pulpotomy, with the understanding that the procedure will be converted to a full pulpectomy (root canal treatment) if intra-operative findings are unfavorable9999999.  **1. Informed Consent**   - Discuss the diagnosis and the two primary treatment options with the patient:   - **Full Pulpotomy:** A vital pulp therapy procedure to remove the inflamed coronal pulp tissue while preserving the healthy tissue in the roots10. This is a modern, less invasive option with high success rates in appropriate cases11.   - **Nonsurgical Root Canal Treatment (Pulpectomy):** The conventional treatment involving the complete removal of all pulp tissue from the crown and roots12. - Obtain informed consent, ensuring the patient understands that the final decision will be made during the procedure based on the pulp's ability to achieve hemostasis13.   **2. Operative Procedure**   - **Anesthesia and Isolation:** Administer profound local anesthesia. Isolate the tooth with a   **dental dam**, which is the mandatory standard of care to maintain an aseptic field and prevent bacterial contamination141414141414141414.   - **Caries Excavation and Pulp Exposure:**   - Use magnification (dental loupes or microscope) for enhanced visualization15151515.   - Remove the existing restoration and perform **complete (non-selective) caries removal** to eliminate all infected tissue [user, 3885].   - Upon carious pulp exposure, completely unroof the pulp chamber to gain full access to the coronal pulp tissue. - **Full Pulpotomy and Intra-operative Assessment (Decision Point):**   - Amputate the entire coronal pulp tissue to the level of the root canal orifices using a sterile high-speed round bur with water coolant16.   - **Hemostasis and Diagnosis:** This is the most critical diagnostic step17. Gently apply a cotton pellet moistened with   **1%–5% sodium hypochlorite (NaOCl)** to the pulp stumps18181818.   - - **Decision Criteria:**     - **Proceed with Pulpotomy:** If hemostasis is achieved within **5–10 minutes**, it indicates the inflammation is confined to the coronal pulp and the remaining radicular tissue is healthy enough to be preserved1919191919191919.     - **Convert to Pulpectomy (RCT):** If bleeding cannot be controlled within this timeframe, it signifies persistent, deep-seated inflammation, and a full pulpotomy is no longer indicated202020202020202020. The procedure must then be converted to a nonsurgical root canal treatment21. - **Completion of Pulpotomy (if indicated):**   - **Pulp Capping:** Place a 2–3 mm layer of a **hydraulic calcium silicate-based cement** (e.g., MTA, Biodentine) directly over the healthy, bleeding-controlled pulp stumps22222222.   - **Restoration:** Place a well-sealed, **immediate permanent restoration** (core build-up) over the cement in the same visit to prevent bacterial microleakage23232323. For an anterior tooth with a large existing restoration, a   **full-coverage crown** is recommended to prevent future fracture [user].  **3. Follow-up**   - **Monitoring:** Schedule follow-up appointments at 6 months and 1 year, then annually24242424. - **Success Assessment:** A successful outcome is defined by the complete resolution of clinical symptoms (especially pain on biting) and radiographic healing of the widened PDL space [user, 1063, 1536]. The tooth is expected to be unresponsive to thermal tests after a full pulpotomy25. | Based on a comparative analysis of the provided clinical recommendations and the patient's case history, the following diagnosis and definitive treatment plan are presented.  **Comparative Diagnosis**  The patient's clinical presentation of a vital pulp with non-lingering thermal sensitivity, but with definitive pain on percussion and radiographic evidence of early periapical inflammation, indicates an advanced inflammatory state [user]. While the thermal symptoms alone suggest a reversible condition, the apical symptoms are the key determinant for the diagnosis.   - **American Association of Endodontists (AAE) Classification:**   - **Pulpal Diagnosis: Asymptomatic Irreversible Pulpitis**. The pulp is vital but has an inflammatory condition that is incapable of healing [user, 4520]. The presence of percussion pain and PDL widening are signs that the inflammation is irreversible, even if thermal symptoms are not lingering [user, 2316].   - **Apical Diagnosis: Symptomatic Apical Periodontitis**. This is based on the patient's chief complaint of pain on chewing, the clinical finding of tenderness to percussion, and the radiographic finding of a slight widening of the PDL space [user, 4534]. - **Indian Endodontic Society (IES) Position Statement Classification:**   - **Diagnosis: Partial Irreversible Pulpitis (restricted to the coronal pulp)**. Although the thermal response is mild, the IES states that a positive response to percussion is indicative of irreversible changes [user, 3881]. This diagnosis suggests the inflammation is advanced but may be confined to the coronal pulp, making it a potential candidate for a pulpotomy rather than immediate pulpectomy [user, 3785]. - **European Society of Endodontology (ESE) & Wolters et al. Consensus:**   - **Diagnosis (ESE): Irreversible Pulpitis**. The presence of tenderness to percussion combined with radiographic changes in the PDL space points to an irreversible inflammatory state, even in the absence of lingering thermal pain [user, 2704].   - **Diagnosis (Wolters et al.): Mild Pulpitis**. This classification is based on a "heightened but not lengthened" response to thermal tests and the tooth being "possibly percussion sensitive" [user, 2167].   Diagnostic Summary:  All guidelines indicate that although the pulp is vital, the inflammation has extended into the periapical tissues, causing symptomatic apical periodontitis [user, 4534]. The definitive diagnosis is Asymptomatic Irreversible Pulpitis with Symptomatic Apical Periodontitis. While traditionally this would mandate root canal treatment, modern guidelines and evidence now support attempting a full pulpotomy, with the final treatment decision based on intra-operative findings1111.  **Definitive Treatment Plan**  The treatment plan must address the irreversible nature of the pulpal inflammation and the symptomatic apical periodontitis [user]. The recommended modern approach is to attempt a full pulpotomy, with the understanding that the procedure will be converted to a full pulpectomy (root canal treatment) if intra-operative findings are unfavorable2222.  **1. Informed Consent and Pre-operative Procedures**   - **Discussion:** Explain the two primary treatment options to the patient:   - **Full Pulpotomy:** A procedure to remove the inflamed coronal pulp tissue while preserving the vital tissue in the roots, which is viable if the inflammation is not too advanced3333.   - **Nonsurgical Root Canal Treatment (Pulpectomy):** The conventional treatment involving the complete removal of all pulp tissue4. - **Consent:** Obtain informed consent, ensuring the patient understands that the final decision between pulpotomy and pulpectomy will be made during the procedure based on the health of the pulp tissue, specifically the ability to control bleeding5555.   **2. Operative Procedure**   - **Anesthesia and Isolation:** Administer profound local anesthesia. Isolate the tooth with a   **dental dam**, which is the mandatory standard of care to maintain an aseptic field and prevent bacterial contamination6666.   - **Caries Excavation and Pulp Exposure:**   - Use magnification (dental loupes or microscope) for enhanced visualization7777.   - Remove the existing restoration and perform   **complete (non-selective) caries removal** to eliminate all infected tissue until hard dentin is reached8888.   - - Upon carious pulp exposure, completely unroof the pulp chamber to gain full access to the coronal pulp tissue. - **Full Pulpotomy and Intra-operative Assessment (Decision Point):**   - Amputate the entire coronal pulp tissue to the level of the root canal orifices using a sterile high-speed round bur with water coolant9.   - **Hemostasis and Diagnosis:** This is the most critical diagnostic step10101010. Gently apply a cotton pellet moistened with   **1%–5% sodium hypochlorite (NaOCl)** to the pulp stumps11111111.   - - **Decision Criteria:**     - **Proceed with Pulpotomy:** If hemostasis (cessation of bleeding) is achieved within **5–10 minutes**, it indicates the inflammation is confined to the coronal pulp and the remaining radicular tissue is healthy enough to be preserved12121212.     - **Convert to Pulpectomy (RCT):** If bleeding cannot be controlled within this timeframe, it signifies persistent, deep-seated inflammation, and a full pulpotomy is no longer indicated. The procedure must then be converted to a nonsurgical root canal treatment13131313. - **Completion of Pulpotomy (if indicated):**   - **Pulp Capping:** Place a 2–3 mm layer of a **hydraulic calcium silicate-based cement** (e.g., MTA, Biodentine) directly over the healthy, bleeding-controlled pulp stumps. These materials have demonstrated superior clinical outcomes compared to calcium hydroxide14141414.   - **Restoration:** Place a well-sealed, **immediate permanent restoration** (core build-up) over the cement in the same visit to prevent bacterial microleakage15151515. For an anterior tooth with a large pre-existing restoration, a   **full coverage restoration** (e.g., a crown) is recommended to protect the remaining tooth structure16.  **3. Follow-up**   - **Monitoring:** Schedule follow-up appointments at 6 months and 1 year, then annually for up to 4 years17171717. - **Success Assessment:** A successful outcome is defined by the complete resolution of clinical symptoms (especially pain on biting) and radiographic healing of the widened PDL space [user, 2836, 4118]. The tooth is expected to be unresponsive to thermal tests after a full pulpotomy but may respond to EPT18181818. | Based on a comparative analysis of the provided clinical recommendations and the patient's case history, the following diagnosis and definitive treatment plan are presented.  **Comparative Diagnosis**  This case presents a conflict between the thermal test results, which suggest a reversible condition, and the percussion and radiographic findings, which indicate irreversible inflammation that has extended into the periapical tissues [user]. When such conflicts arise, the more severe signs dictate the diagnosis.   - **American Association of Endodontists (AAE) Classification:**   - **Pulpal Diagnosis: Symptomatic Irreversible Pulpitis**. Although the thermal sensitivity is brief, the presence of tenderness to percussion is a key indicator [user]. The AAE states that with percussion pain, "the pulp is considered to be in an irreversibly inflamed state"1. Severe pain to percussion is "highly indicative of a degenerating pulp and root canal treatment is needed"2.   - **Apical Diagnosis: Symptomatic Apical Periodontitis**. This diagnosis is based on the patient's chief complaint of pain on chewing, the clinical finding of tenderness to percussion, and the radiographic finding of a slight widening of the PDL space [user, 5011, 5012]. - **Indian Endodontic Society (IES) Position Statement Classification:**   - **Diagnosis: Complete Irreversible Pulpitis (extending into the radicular pulp)**. While the thermal symptoms are mild, the IES guidelines state that teeth with a positive response to percussion are not suitable candidates for vital pulp therapy and should be managed with pulpectomy [user, 4358]. This indicates the inflammation has progressed to an irreversible state, for which "Pulpectomy is the treatment of choice"3. - **European Society of Endodontology (ESE) & Wolters et al. Consensus:**   - **Diagnosis (ESE): Irreversible Pulpitis**. The ESE states that symptoms of irreversible pulpitis can include pain that lingers after a stimulus4. Even though the thermal pain is not lingering in this case, the pain on percussion and radiographic PDL widening are definitive signs that the inflammation has progressed beyond a reversible state [user, 1941].   - **Diagnosis (Wolters et al.): Mild to Moderate Pulpitis**. The Wolters et al. system describes   **Mild Pulpitis** as being "possibly percussion sensitive" but with a thermal response that can last up to 20 seconds5.  **Moderate Pulpitis** is also "possibly percussion sensitive" but has a prolonged thermal reaction lasting minutes6. Given the definite percussion sensitivity, the condition is at least a Mild to Moderate Pulpitis, indicating irreversible changes [user].  Diagnostic Summary:  All guidelines, when weighing the complete clinical picture, converge on a diagnosis of irreversible pulpal disease with inflammation extending into the periapical tissues. The pain on percussion and widened PDL are the definitive signs that override the non-lingering thermal response. The definitive diagnosis is Symptomatic Irreversible Pulpitis with Symptomatic Apical Periodontitis.  **Definitive Treatment Plan**  Given the diagnosis of symptomatic irreversible pulpitis with apical involvement, vital pulp therapy is contraindicated. The standard of care and the only definitive treatment to resolve the patient's symptoms and save the tooth is nonsurgical root canal treatment.  **1. Informed Consent**   - Discuss the diagnosis with the patient, explaining that the nerve tissue inside the tooth is irreversibly inflamed and that the inflammation has spread to the ligament around the root, which is the cause of the pain when chewing [user]. - Explain the definitive need for nonsurgical root canal treatment to resolve the infection and save the tooth. Discuss the procedure, prognosis, and alternatives, including extraction.   2. Nonsurgical Root Canal Treatment (Pulpectomy)  The objective is the "biologically acceptable chemical and mechanical treatment of the root canal system to promote healing and repair of the periradicular tissues"7.   - **Anesthesia and Isolation:**   - Administer profound local anesthesia for patient comfort.   - Isolate the tooth with a   **dental dam**, which is the "standard of care; it is integral and essential for any nonsurgical endodontic treatment"8.   - **Procedure Steps:**   1. **Access Cavity Preparation:** Create an adequate opening into the tooth to locate and access the root canal system9.   2. **Cleaning and Shaping:** Use specialized instruments to debride, enlarge, and shape the entire root canal system, removing the inflamed pulp tissue and bacteria10.   3. **Disinfection:** Copiously irrigate the canal system with chemical disinfectants (e.g., sodium hypochlorite) to eliminate remaining microorganisms and dissolve organic debris11.   4. **Obturation:** After thorough cleaning and disinfection, the root canal system is filled and sealed with a biologically acceptable material (e.g., gutta-percha) and a root canal sealer to establish an adequate seal and prevent re-infection12.   **3. Definitive Restoration**   - The tooth must be restored   **as soon as possible** following the completion of the root canal treatment to prevent coronal leakage and fracture of the remaining tooth structure13.   - Given the presence of a large existing restoration, the final restoration will likely require a core buildup and a **full cuspal protective restoration** (e.g., a crown) to protect the remaining tooth structure and provide an adequate coronal seal [user, 987].   **4. Follow-up**   - The patient should be recalled for follow-up visits to monitor the healing of the periapical tissues. - A successful outcome is defined by the complete resolution of clinical signs and symptoms (i.e., no more pain on biting) and radiographic evidence of the resolution of the PDL widening and maintenance of healthy periapical tissues14141414. |
| 9 | Based on a comparative analysis of the provided clinical recommendations and the patient's case history, the following diagnosis and definitive treatment plan are presented.  **Comparative Diagnosis**  The patient's clinical presentation, characterized by lingering pain to thermal stimuli, pain on percussion, and radiographic signs of apical inflammation, is a classic presentation of advanced pulpal disease that has extended into the periradicular tissues [user]. The diagnosis is definitive and consistent across all applicable guidelines.   - **American Association of Endodontists (AAE) Classification:**   - **Pulpal Diagnosis: Symptomatic Irreversible Pulpitis**. This diagnosis is based on the key finding of lingering pain after a thermal stimulus [user, 93]. The AAE states that this condition indicates a vital, inflamed pulp that is incapable of healing, and for which root canal treatment is indicated1.   - **Apical Diagnosis: Symptomatic Apical Periodontitis**. This is determined by the patient's report of pain on chewing, the clinical finding of tenderness to percussion, and the radiographic finding of a slight widening of the periodontal ligament (PDL) space [user, 112]. - **Indian Endodontic Society (IES) Position Statement Classification:**   - **Symptom Classification: Severe symptomatic (indicative of irreversible pulpal changes)**. This is based on the patient's report of severe, lingering pain after a stimulus is removed [user, 3923].   - **Overall Diagnosis: Complete Irreversible Pulpitis (extending into the radicular pulp)**. The severe symptoms combined with tenderness to percussion and PDL widening indicate a persistent inflammatory condition involving the entire pulp [user, 4013]. For this diagnosis,   **pulpectomy is the treatment of choice**2.   - **European Society of Endodontology (ESE) & Wolters et al. Consensus:**   - **Diagnosis (ESE): Irreversible Pulpitis**. The ESE defines irreversible damage as being characterized by spontaneous pain that lingers after the removal of a stimulus3. The patient's symptoms align perfectly with this definition [user].   - **Diagnosis (Wolters et al.): Severe Pulpitis**. This classification is used for cases with "severe spontaneous pain and clear pain reaction to warmth and cold stimuli... Tooth is very sensitive to touch and percussion"4. This accurately describes the patient's clinical condition [user].   Diagnostic Summary:  All guidelines unanimously indicate that the tooth has a vital but irreversibly inflamed pulp with inflammation extending into the periapical tissues. The definitive diagnosis is Symptomatic Irreversible Pulpitis with Symptomatic Apical Periodontitis. Vital pulp therapy is contraindicated.  **Definitive Treatment Plan**  The only definitive treatment to resolve the patient's symptoms and save the tooth is nonsurgical root canal treatment (pulpectomy).  **1. Informed Consent**   - Discuss the diagnosis with the patient, explaining that the nerve tissue inside the tooth is irreversibly inflamed and that the inflammation has spread to the ligament around the root, causing the pain on biting [user]. - Explain the necessity of nonsurgical root canal treatment to resolve the infection and save the tooth5. Discuss the procedure, prognosis, and alternatives, including extraction.   2. Nonsurgical Root Canal Treatment (Pulpectomy)  The objective is the "biologically acceptable chemical and mechanical treatment of the root canal system to promote healing and repair of the periradicular tissues"6.   - **Anesthesia and Isolation:**   - Administer profound local anesthesia for patient comfort.   - Isolate the tooth with a   **dental dam**, which is the "standard of care; it is integral and essential for any nonsurgical endodontic treatment"7.   - **Procedure Steps:**   1. **Access Cavity Preparation:** Create an adequate opening into the tooth to locate and access the root canal system8.   2. **Cleaning and Shaping:** Use specialized instruments to debride, enlarge, and shape the entire root canal system, removing the inflamed pulp tissue and bacteria9.   3. **Disinfection:** Copiously irrigate the canal system with chemical disinfectants (e.g., sodium hypochlorite) to eliminate remaining microorganisms and dissolve organic debris10.   4. **Obturation:** After thorough cleaning and disinfection, the root canal system is filled and sealed with a biologically acceptable material (e.g., gutta-percha) and a root canal sealer to establish an adequate seal and prevent re-infection11. The filling should extend as close as possible to the apical constriction12.   **3. Definitive Restoration**   - The tooth must be restored   **as soon as possible** following the completion of the root canal treatment to prevent coronal leakage and fracture of the remaining tooth structure13.   - Given the presence of a large existing restoration, the final restoration will likely require a core buildup and a **full cuspal protective restoration** (e.g., a crown) to protect the remaining tooth structure [user, 3494].   **4. Follow-up**   - The patient should be recalled for follow-up visits to monitor the healing of the periapical tissues14. - A successful outcome is defined by the complete resolution of clinical signs and symptoms (i.e., no more pain on biting or thermal sensitivity) and radiographic evidence of the resolution of the PDL widening and maintenance of healthy periapical tissues [user, 2843]. | Based on a comparative analysis of the provided clinical recommendations and the patient's case history, the following diagnosis and definitive treatment plan are presented.  **Comparative Diagnosis**  The patient's clinical presentation, characterized by lingering pain to thermal stimuli and pain on percussion, points conclusively to an advanced state of pulpal and periapical inflammation [user]. There is a clear consensus across all applicable guidelines.   - **American Association of Endodontists (AAE) Classification:**   - **Pulpal Diagnosis: Symptomatic Irreversible Pulpitis**. This diagnosis is based on the patient's report of a sharp, prolonged response to cold stimuli that lingers for 10-15 seconds [user, 1910]. The AAE defines this condition by characteristics that include sharp pain upon thermal stimulus and lingering pain after the stimulus is removed1.   - **Apical Diagnosis: Symptomatic Apical Periodontitis**. This is determined by the tenderness to percussion, pain on the bite test, and the slight widening of the periodontal ligament (PDL) space visible on the radiograph [user, 1929]. This diagnosis represents inflammation of the apical periodontium producing a painful response to biting and/or percussion2. - **Indian Endodontic Society (IES) Position Statement Classification:**   - **Symptom Classification: Severe symptomatic (indicative of irreversible pulpal changes)**3. This is based on the patient's symptoms persisting for longer periods, even after a stimulus is removed [user, 1091].   - **Overall Diagnosis: Complete Irreversible Pulpitis (extending into the radicular pulp)**4. Given the severe symptoms and signs of apical inflammation (tenderness to percussion), the IES classifies this as a persistent inflammatory condition involving both the coronal and radicular pulp, for which   **pulpectomy is the treatment of choice**5555.   - **European Society of Endodontology (ESE) & Wolters et al. Consensus:**   - **Diagnosis (ESE): Irreversible Pulpitis**. The ESE states that irreversible damage is characterized by pain that lingers after removal of the stimulus [user, 683]. The tenderness to percussion and PDL widening further confirm this diagnosis [user, 639].   - **Diagnosis (Wolters et al.): Severe Pulpitis**. This classification is for cases with a "clear pain reaction to warmth and cold stimuli" where the "tooth is very sensitive to touch and percussion"6. This aligns with the patient's clinical findings [user].   Diagnostic Summary:  All guidelines unanimously indicate that the tooth has a vital but irreversibly inflamed pulp with inflammation extending into the periapical tissues. The definitive diagnosis is Symptomatic Irreversible Pulpitis with Symptomatic Apical Periodontitis. Vital pulp therapy is contraindicated, and nonsurgical root canal treatment is the required standard of care777.  **Definitive Treatment Plan**  The only definitive treatment to resolve the patient's symptoms and save the tooth is nonsurgical root canal treatment (pulpectomy) to remove the inflamed tissue and disinfect the root canal system8.  **1. Informed Consent**   - Discuss the diagnosis with the patient, explaining that the nerve tissue inside the tooth is irreversibly inflamed and that the inflammation has spread to the ligament around the root tip, which is causing the pain on biting [user]. - Explain the necessity of nonsurgical root canal treatment to resolve the infection and save the tooth [user]. Discuss the procedure, prognosis, and alternatives, including extraction.   2. Nonsurgical Root Canal Treatment (Pulpectomy)  The objective is the "biologically acceptable chemical and mechanical treatment of the root canal system to promote healing and repair of the periradicular tissues"9.   - **Anesthesia and Isolation:**   - Administer profound local anesthesia for patient comfort.   - Isolate the tooth with a   **dental dam**, which is the "standard of care; it is integral and essential for any nonsurgical endodontic treatment"10.   - **Procedure Steps:**   1. **Access Cavity Preparation:** Create an adequate opening into the tooth to locate and access the root canal system11.   2. **Cleaning and Shaping:** Use specialized instruments to debride, enlarge, and shape the entire root canal system, removing the inflamed pulp tissue, bacteria, and their byproducts12.   3. **Disinfection:** Copiously irrigate the canal system with chemical disinfectants (e.g., sodium hypochlorite) to eliminate remaining microorganisms and dissolve organic debris13.   4. **Obturation:** After thorough cleaning and disinfection, the root canal system is filled and sealed with a biologically acceptable material (e.g., gutta-percha) and a root canal sealer to establish an adequate seal and prevent re-infection14. The filling should extend as close as possible to the apical constriction15.   **3. Definitive Restoration**   - The tooth must be restored   **as soon as possible** following the completion of the root canal treatment to prevent coronal leakage and fracture of the remaining tooth structure16.   - Given the presence of a large existing restoration, the final restoration will likely require a core buildup and a **full-coverage crown** to protect the remaining tooth structure and provide a coronal seal [user].   **4. Follow-up**   - The patient should be recalled for follow-up visits to monitor the healing of the periapical tissues17. - A successful outcome is defined by the complete resolution of clinical signs and symptoms (i.e., no more pain on biting or thermal sensitivity) and radiographic evidence of healing of the widened PDL space, with the subsequent appearance of an intact lamina dura [user, 3849]. | Based on a comparative analysis of the provided clinical recommendations and the patient's case history, the following diagnosis and definitive treatment plan are presented.  **Comparative Diagnosis**  The patient's clinical presentation, characterized by lingering pain to thermal stimuli, pain on chewing, and tenderness to percussion, provides a clear and consistent diagnosis of an advanced, irreversible inflammatory state of the pulp that has extended to the periapical tissues [user].   - **American Association of Endodontists (AAE) Classification:**   - **Pulpal Diagnosis: Symptomatic Irreversible Pulpitis**1. This diagnosis is based on the key finding of lingering pain (15 seconds) following a cold stimulus [user]. The AAE defines this condition by characteristics including sharp pain upon thermal stimulus that continues long after the stimulus is removed2.   - **Apical Diagnosis: Symptomatic Apical Periodontitis**3. This is determined by the patient's report of pain on chewing, the clinical finding of tenderness to percussion, and the radiographic finding of a slight widening of the PDL space [user, 1910, 1911]. - **Indian Endodontic Society (IES) Position Statement Classification:**   - **Symptom Classification: Severe symptomatic (indicative of irreversible pulpal changes)**4. This is based on the patient's symptoms of lingering pain that persists after the stimulus is removed [user, 4400, 4401].   - **Overall Diagnosis: Complete Irreversible Pulpitis (extending into the radicular pulp)**5. The combination of severe, lingering symptoms with signs of apical inflammation (tenderness to percussion, PDL widening) indicates a persistent inflammatory condition involving the entire pulp, for which   **pulpectomy is the treatment of choice** [user, 4491, 4492].   - **European Society of Endodontology (ESE) & Wolters et al. Consensus:**   - **Diagnosis (ESE): Irreversible Pulpitis**6. The ESE states that irreversible damage is characterized by pain that lingers after the removal of a stimulus, which is a primary finding in this case [user, 566]. The tenderness to percussion further confirms this diagnosis [user].   - **Diagnosis (Wolters et al.): Severe Pulpitis**7. This classification is for cases with a "clear pain reaction to warmth and cold stimuli" where the tooth is "very sensitive to touch and percussion," which aligns with the patient's clinical findings [user, 2558, 2559].   Diagnostic Summary:  All applicable guidelines unanimously indicate that the tooth has a vital but irreversibly inflamed pulp, with the inflammation extending into the periapical tissues. The definitive diagnosis is Symptomatic Irreversible Pulpitis with Symptomatic Apical Periodontitis. Vital pulp therapy is contraindicated.  **Definitive Treatment Plan**  The only definitive treatment to resolve the patient's symptoms and save the tooth is nonsurgical root canal treatment (pulpectomy) to remove the inflamed tissue and disinfect the root canal system [user, 562, 1912].  **1. Informed Consent**   - Discuss the diagnosis with the patient, explaining that the nerve tissue inside the tooth is irreversibly inflamed and that this inflammation has spread to the ligament around the root, causing the pain when chewing [user]. - Explain the necessity of nonsurgical root canal treatment to resolve the infection and save the tooth. Discuss the procedure, prognosis, and alternatives, including extraction.   2. Nonsurgical Root Canal Treatment (Pulpectomy)  The objective is the "biologically acceptable chemical and mechanical treatment of the root canal system to promote healing and repair of the periradicular tissues"8.   - **Anesthesia and Isolation:**   - Administer profound local anesthesia for patient comfort.   - Isolate the tooth with a   **dental dam**, which is the "standard of care; it is integral and essential for any nonsurgical endodontic treatment" to minimize the risk of bacterial contamination9999.   - **Procedure Steps:**   1. **Access Cavity Preparation:** Create an adequate opening into the tooth to locate and access the root canal system10.   2. **Cleaning and Shaping:** Use specialized instruments to debride, enlarge, and shape the entire root canal system, removing the inflamed pulp tissue, bacteria, and their byproducts11.   3. **Disinfection:** Copiously irrigate the canal system with chemical disinfectants (e.g., sodium hypochlorite) to eliminate remaining microorganisms and dissolve organic debris12.   4. **Obturation:** After thorough cleaning and disinfection, the root canal system is filled and sealed with a biologically acceptable material (e.g., gutta-percha) and a root canal sealer to establish an adequate seal and prevent re-infection13.   **3. Definitive Restoration**   - The tooth must be restored   **as soon as possible** following the completion of the root canal treatment to prevent coronal leakage and fracture of the remaining tooth structure14.   - Given the presence of a large existing restoration, the final restoration will likely require a core buildup and a **full cuspal protective restoration** (e.g., a crown) to protect the remaining tooth structure and provide a coronal seal [user, 3649].   **4. Follow-up**   - The patient should be recalled for follow-up visits to monitor the healing of the periapical tissues15. - A successful outcome is defined by the complete resolution of clinical signs and symptoms (i.e., no more pain on biting or thermal sensitivity) and radiographic evidence of the resolution of the PDL widening, with the subsequent appearance of an intact lamina dura [user, 2997]. |
| 10 | Based on a comparative analysis of the provided clinical recommendations and the patient's case history, the following diagnosis and definitive treatment plan are presented.  **Comparative Diagnosis**  The patient's clinical presentation, particularly the severe lingering pain to cold stimuli and tenderness to percussion, provides a clear and consistent diagnosis of an advanced, irreversible inflammatory state of the pulp that has extended to the periapical tissues [user].   - **American Association of Endodontists (AAE) Classification:**   - **Pulpal Diagnosis: Symptomatic Irreversible Pulpitis**. This diagnosis is based on the key finding of lingering pain (15+ seconds) following a cold stimulus [user]. The AAE defines this condition by characteristics that include "sharp pain upon thermal stimulus, lingering pain (often 30 seconds or longer after stimulus removal)"1.   - **Apical Diagnosis: Symptomatic Apical Periodontitis**. This is determined by the patient's tenderness when biting, the clinical finding of tenderness to percussion, and the radiographic finding of a slight widening of the PDL space [user, 112]. - **Indian Endodontic Society (IES) Position Statement Classification:**   - **Symptom Classification: Severe symptomatic (indicative of irreversible pulpal changes)**. This is based on the patient's symptoms of lingering pain that persists after the stimulus is removed [user, 3951].   - **Overall Diagnosis: Complete Irreversible Pulpitis (extending into the radicular pulp)**. The combination of severe, lingering symptoms with signs of apical inflammation (tenderness to percussion, PDL widening) indicates a persistent inflammatory condition involving the entire pulp, for which **pulpectomy is the treatment of choice** [user, 4042]. - **European Society of Endodontology (ESE) & Wolters et al. Consensus:**   - **Diagnosis (ESE): Irreversible Pulpitis**. The ESE states that irreversible damage is characterized by pain that lingers after the removal of a stimulus, which is a primary finding in this case [user, 4808]. The tenderness to percussion further supports this diagnosis [user].   - **Diagnosis (Wolters et al.): Severe Pulpitis**. This classification is for cases with a "clear pain reaction to warmth and cold stimuli" where the tooth is "very sensitive to touch and percussion," which aligns with the patient's clinical findings [user, 2182, 2183].   Diagnostic Summary:  All applicable guidelines unanimously indicate that the tooth has a vital but irreversibly inflamed pulp, with the inflammation extending into the periapical tissues. The definitive diagnosis is Symptomatic Irreversible Pulpitis with Symptomatic Apical Periodontitis. Vital pulp therapy is contraindicated.  **Definitive Treatment Plan**  The only definitive treatment to resolve the patient's symptoms and save the tooth is nonsurgical root canal treatment (pulpectomy) to remove the inflamed tissue and disinfect the root canal system [user, 92, 1628].  **1. Informed Consent**   - Discuss the diagnosis with the patient, explaining that the nerve tissue inside the tooth is irreversibly inflamed and that this inflammation has spread to the ligament around the root, causing the pain on biting [user]. - Explain the necessity of nonsurgical root canal treatment to resolve the infection and save the tooth. Discuss the procedure, prognosis, and alternatives, including extraction.   2. Nonsurgical Root Canal Treatment (Pulpectomy)  The objective is the "biologically acceptable chemical and mechanical treatment of the root canal system to promote healing and repair of the periradicular tissues"2.   - **Anesthesia and Isolation:**   - Administer profound local anesthesia for patient comfort.   - Isolate the tooth with a   **dental dam**, which is the "standard of care; it is integral and essential for any nonsurgical endodontic treatment"3.   - **Procedure Steps:**   1. **Access Cavity Preparation:** Create an adequate opening into the tooth to locate and access the root canal system4.   2. **Cleaning and Shaping:** Use specialized instruments to debride, enlarge, and shape the entire root canal system, removing the inflamed pulp tissue, bacteria, and their byproducts5.   3. **Disinfection:** Copiously irrigate the canal system with chemical disinfectants (e.g., sodium hypochlorite) to eliminate remaining microorganisms and dissolve organic debris6.   4. **Obturation:** After thorough cleaning and disinfection, the root canal system is filled and sealed with a biologically acceptable material (e.g., gutta-percha) and a root canal sealer to establish an adequate seal and prevent re-infection7.   **3. Definitive Restoration**   - The tooth must be restored   **as soon as possible** following the completion of the root canal treatment to prevent coronal leakage and fracture of the remaining tooth structure8.   - The final restoration for an anterior tooth depends on the amount of remaining coronal structure but may involve a post and core buildup followed by a crown to provide an adequate coronal seal and protect the tooth9999.   **4. Follow-up**   - The patient should be recalled for follow-up visits to monitor the healing of the periapical tissues10. - A successful outcome is defined by the complete resolution of clinical signs and symptoms (i.e., no more pain on biting or thermal sensitivity) and radiographic evidence of the resolution of the PDL widening, with the subsequent appearance of an intact lamina dura [user, 2621]. | Based on a comparative analysis of the provided clinical recommendations and the patient's case history, the following diagnosis and definitive treatment plan are presented.  **Comparative Diagnosis**  The patient's clinical presentation, characterized by severe lingering pain to thermal stimuli and tenderness to percussion, provides a clear and consistent diagnosis of an advanced, irreversible inflammatory state of the pulp that has extended to the periapical tissues [user].   - **American Association of Endodontists (AAE) Classification:**   - **Pulpal Diagnosis: Symptomatic Irreversible Pulpitis**1. This diagnosis is based on the key finding of severe lingering pain (15+ seconds) following a cold stimulus [user, 909]. The AAE defines this condition by characteristics including sharp pain upon thermal stimulus that continues long after the stimulus is removed2.   - **Apical Diagnosis: Symptomatic Apical Periodontitis**3. This is determined by the patient's report of tenderness when biting, the clinical finding of tenderness to percussion, and the radiographic finding of a slight widening of the PDL space [user, 928]. - **Indian Endodontic Society (IES) Position Statement Classification:**   - **Symptom Classification: Severe symptomatic (indicative of irreversible pulpal changes)**4. This is based on the patient's symptoms of lingering pain that persists after the stimulus is removed [user, 90, 91].   - **Overall Diagnosis: Complete Irreversible Pulpitis (extending into the radicular pulp)**5. The combination of severe, lingering symptoms with signs of apical inflammation (tenderness to percussion, PDL widening) indicates a persistent inflammatory condition involving the entire pulp, for which   **pulpectomy is the treatment of choice** [user, 181].   - **European Society of Endodontology (ESE) & Wolters et al. Consensus:**   - **Diagnosis (ESE): Irreversible Pulpitis**6. The ESE states that irreversible damage is characterized by pain that lingers after the removal of a stimulus, which is a primary finding in this case [user, 4395]. The tenderness to percussion and PDL widening further confirm this diagnosis [user, 4395].   - **Diagnosis (Wolters et al.): Severe Pulpitis**7. This classification is for cases with a "clear pain reaction to warmth and cold stimuli" where the tooth is "very sensitive to touch and percussion," which aligns with the patient's clinical findings [user, 3570, 3571].   Diagnostic Summary:  All applicable guidelines unanimously indicate that the tooth has a vital but irreversibly inflamed pulp, with the inflammation extending into the periapical tissues. The definitive diagnosis is Symptomatic Irreversible Pulpitis with Symptomatic Apical Periodontitis [user, 908, 928]. Vital pulp therapy is contraindicated.  **Definitive Treatment Plan**  The only definitive treatment to resolve the patient's symptoms and save the tooth is nonsurgical root canal treatment (pulpectomy) to remove the inflamed tissue and disinfect the root canal system [user, 181, 4507].  **1. Informed Consent**   - Discuss the diagnosis with the patient, explaining that the nerve tissue inside the tooth is irreversibly inflamed and that this inflammation has spread to the ligament around the root, causing the pain when biting [user]. - Explain the necessity of nonsurgical root canal treatment to resolve the infection and save the tooth. Discuss the procedure, prognosis, and alternatives, including extraction.   2. Nonsurgical Root Canal Treatment (Pulpectomy)  The objective is the "biologically acceptable chemical and mechanical treatment of the root canal system to promote healing and repair of the periradicular tissues"8.   - **Anesthesia and Isolation:**   - Administer profound local anesthesia for patient comfort.   - Isolate the tooth with a   **dental dam**, which is the "standard of care; it is integral and essential for any nonsurgical endodontic treatment"9.   - **Procedure Steps:**   1. **Access Cavity Preparation:** Create an adequate opening into the tooth to locate and access the root canal system10.   2. **Cleaning and Shaping:** Use specialized instruments to debride, enlarge, and shape the entire root canal system, removing the inflamed pulp tissue, bacteria, and their byproducts11.   3. **Disinfection:** Copiously irrigate the canal system with chemical disinfectants (e.g., sodium hypochlorite) to eliminate remaining microorganisms and dissolve organic debris.   4. **Obturation:** After thorough cleaning and disinfection, the root canal system is filled and sealed with a biologically acceptable material (e.g., gutta-percha) and a root canal sealer to establish an adequate seal and prevent re-infection12.   **3. Definitive Restoration**   - The tooth must be restored   **as soon as possible** following the completion of the root canal treatment to prevent coronal leakage and fracture of the remaining tooth structure13.   - The choice of the final restoration should be based on esthetic and functional requirements, providing a coronal seal and protecting the remaining tooth structure14. This may involve a core buildup and a crown.   **4. Follow-up**   - The patient should be recalled for follow-up visits to monitor the healing of the periapical tissues. - A successful outcome is defined by the complete resolution of clinical signs and symptoms (i.e., no more pain on biting or lingering sensitivity) and radiographic evidence of the resolution of the PDL widening, with the subsequent appearance of an intact lamina dura [user, 1373]. | Based on a comparative analysis of the provided clinical recommendations and the patient's case history, the following diagnosis and definitive treatment plan are presented.  **Comparative Diagnosis**  The patient's clinical presentation, characterized by severe lingering pain to thermal stimuli and tenderness to percussion, provides a clear and consistent diagnosis of an advanced, irreversible inflammatory state of the pulp that has extended to the periapical tissues [user].   - **American Association of Endodontists (AAE) Classification:**   - **Pulpal Diagnosis: Symptomatic Irreversible Pulpitis**1. This diagnosis is based on the key finding of severe lingering pain (15+ seconds) following a cold stimulus [user, 909]. The AAE defines this condition by characteristics including sharp pain upon thermal stimulus that continues long after the stimulus is removed2.   - **Apical Diagnosis: Symptomatic Apical Periodontitis**3. This is determined by the patient's report of tenderness when biting, the clinical finding of tenderness to percussion, and the radiographic finding of a slight widening of the PDL space [user, 928]. - **Indian Endodontic Society (IES) Position Statement Classification:**   - **Symptom Classification: Severe symptomatic (indicative of irreversible pulpal changes)**4. This is based on the patient's symptoms of lingering pain that persists after the stimulus is removed [user, 90, 91].   - **Overall Diagnosis: Complete Irreversible Pulpitis (extending into the radicular pulp)**5. The combination of severe, lingering symptoms with signs of apical inflammation (tenderness to percussion, PDL widening) indicates a persistent inflammatory condition involving the entire pulp, for which   **pulpectomy is the treatment of choice** [user, 181].   - **European Society of Endodontology (ESE) & Wolters et al. Consensus:**   - **Diagnosis (ESE): Irreversible Pulpitis**6. The ESE states that irreversible damage is characterized by pain that lingers after the removal of a stimulus, which is a primary finding in this case [user, 4395]. The tenderness to percussion and PDL widening further confirm this diagnosis [user, 4395].   - **Diagnosis (Wolters et al.): Severe Pulpitis**7. This classification is for cases with a "clear pain reaction to warmth and cold stimuli" where the tooth is "very sensitive to touch and percussion," which aligns with the patient's clinical findings [user, 3570, 3571].   Diagnostic Summary:  All applicable guidelines unanimously indicate that the tooth has a vital but irreversibly inflamed pulp, with the inflammation extending into the periapical tissues. The definitive diagnosis is Symptomatic Irreversible Pulpitis with Symptomatic Apical Periodontitis [user, 908, 928]. Vital pulp therapy is contraindicated.  **Definitive Treatment Plan**  The only definitive treatment to resolve the patient's symptoms and save the tooth is nonsurgical root canal treatment (pulpectomy) to remove the inflamed tissue and disinfect the root canal system [user, 181, 4507].  **1. Informed Consent**   - Discuss the diagnosis with the patient, explaining that the nerve tissue inside the tooth is irreversibly inflamed and that this inflammation has spread to the ligament around the root, causing the pain when biting [user]. - Explain the necessity of nonsurgical root canal treatment to resolve the infection and save the tooth. Discuss the procedure, prognosis, and alternatives, including extraction.   2. Nonsurgical Root Canal Treatment (Pulpectomy)  The objective is the "biologically acceptable chemical and mechanical treatment of the root canal system to promote healing and repair of the periradicular tissues"8.   - **Anesthesia and Isolation:**   - Administer profound local anesthesia for patient comfort.   - Isolate the tooth with a   **dental dam**, which is the "standard of care; it is integral and essential for any nonsurgical endodontic treatment"9.   - **Procedure Steps:**   1. **Access Cavity Preparation:** Create an adequate opening into the tooth to locate and access the root canal system10.   2. **Cleaning and Shaping:** Use specialized instruments to debride, enlarge, and shape the entire root canal system, removing the inflamed pulp tissue, bacteria, and their byproducts11.   3. **Disinfection:** Copiously irrigate the canal system with chemical disinfectants (e.g., sodium hypochlorite) to eliminate remaining microorganisms and dissolve organic debris.   4. **Obturation:** After thorough cleaning and disinfection, the root canal system is filled and sealed with a biologically acceptable material (e.g., gutta-percha) and a root canal sealer to establish an adequate seal and prevent re-infection12.   **3. Definitive Restoration**   - The tooth must be restored   **as soon as possible** following the completion of the root canal treatment to prevent coronal leakage and fracture of the remaining tooth structure13.   - The choice of the final restoration should be based on esthetic and functional requirements, providing a coronal seal and protecting the remaining tooth structure14. This may involve a core buildup and a crown.   **4. Follow-up**   - The patient should be recalled for follow-up visits to monitor the healing of the periapical tissues. - A successful outcome is defined by the complete resolution of clinical signs and symptoms (i.e., no more pain on biting or lingering sensitivity) and radiographic evidence of the resolution of the PDL widening, with the subsequent appearance of an intact lamina dura [user, 1373]. |

| **Case History** | **Response 1** | **Response 2** | **Response 3** |
| --- | --- | --- | --- |
| 1 | **Comparative Diagnosis According to Major Guidelines**  **Case Summary**  A 25-year-old female presents with intermittent, **sharp sensitivity to cold** (no lingering/spontaneous pain) in an upper lateral incisor (#7). Exam reveals a **small carious lesion into dentin (distal)**, normal pulp & periapical tests, and no apical pathology on radiograph. The tooth has an existing small restoration, responds immediately but transiently to cold, and is otherwise asymptomatic.  **1. American Association of Endodontists (AAE) Classification**   - **Pulpal Diagnosis:** **Reversible Pulpitis**   - Defined as pain of short duration, triggered only by cold/sweet, that subsides almost immediately with removal of the stimulus and without spontaneous/night pain1[2](https://www.aae.org/specialty/wp-content/uploads/sites/2/2017/07/endodonticdiagnosisfall2013.pdf)[3](https://jcda.ca/article/d90)[4](https://www.sciencedirect.com/science/article/pii/S0099239921005203)[5](https://www.aae.org/specialty/wp-content/uploads/sites/2/2023/12/Fall2013-EndoDiagnosis.pdf)[6](https://pmc.ncbi.nlm.nih.gov/articles/PMC11704326/)[7](https://link.springer.com/article/10.1007/s40368-025-01024-7). Caries, exposed dentin, or defective restoration is common etiology. - **Periapical Diagnosis:** **Normal Apical Tissues**   - No tenderness to percussion or palpation, and no radiographic signs of periapical disease[2](https://www.aae.org/specialty/wp-content/uploads/sites/2/2017/07/endodonticdiagnosisfall2013.pdf).   **Key AAE Points:**   - With immediate, short pain to cold and absence of spontaneous, lingering, or percussion pain, diagnosis is reversible pulpitis. - Treatment aims at removing the etiology (caries/restoration), not root canal therapy[8](https://pmc.ncbi.nlm.nih.gov/articles/PMC9826047/)[9](https://www.aae.org/specialty/wp-content/uploads/sites/2/2017/07/aaeconsensusconferencerecommendeddiagnosticterminology.pdf)[4](https://www.sciencedirect.com/science/article/pii/S0099239921005203).   **2. European Society of Endodontology (ESE) Recommendations**   - **Diagnosis:** **Reversible Pulpitis** due to superficial carious lesion   - Pain is stimulus-dependent and transient, with healthy pulp tissue expected after appropriate management[10](https://onlinelibrary.wiley.com/doi/10.1111/iej.13974)[11](https://britishendodonticsociety.org.uk/_userfiles/pages/files/duncan_et_al2019international_endodontic_journal.pdf)[6](https://pmc.ncbi.nlm.nih.gov/articles/PMC11704326/).   - No radiographic or clinical evidence of pulpal or apical disease.   **Key ESE Points:**   - Advocates for minimally invasive, conservative management. - Diagnosis should guide towards restorative, non-endodontic treatment if the pulp responds normally and the lesion is limited[10](https://onlinelibrary.wiley.com/doi/10.1111/iej.13974)[11](https://britishendodonticsociety.org.uk/_userfiles/pages/files/duncan_et_al2019international_endodontic_journal.pdf).   **3. Indian Endodontic Society (IES) Recommendations**   - **Diagnosis:** **Mild symptomatic, reversible pulpal changes**   - Mild, sharp pain only when stimulated (cold, sweet), resolves immediately, with objective confirmation by cold/EPT tests12[13](https://ies.org.in/images/pdf/vital-pulp-therapy-ies-position-statement.pdf). - **Radiographic Assessment:** Shallow caries separated from pulp by a dentinal barrier is classic for reversible pulpitis12.   **Key IES Points:**   - Both subjective (pain only on stimulus, short-lived) and objective (pulp tests/caries depth) factors are considered. - Avoid pulp exposure during caries removal. Selective excavation or stepwise caries removal can be employed for deep lesions to preserve vitality12.   **4. Wolters et al. (Contemporary Minimally Invasive Philosophy)**   - **Classification:** “Initial” or “Mild” pulpitis   - Heightened but not prolonged response to cold (no lingering, no spontaneous pain). - **Therapeutic Approach:** Indirect pulp capping or selective caries removal, maintaining pulp vitality if possible14[6](https://pmc.ncbi.nlm.nih.gov/articles/PMC11704326/).   **Comparative Treatment Recommendations**   | **Guideline/Source** | **Diagnosis** | **Main Treatment Approach** | **Key Points** | | --- | --- | --- | --- | | AAE | Reversible Pulpitis | Remove cause (caries), protect pulp, restore | RCT not advised; monitor pulp status post-restoration | | ESE | Reversible Pulpitis | Selective caries removal, bioactive liner if deep, restore | Preserve pulp vitality; avoid pulp exposure | | IES | Mild symptomatic, reversible pulpitis | Selective excavation, use biocompatible liner, immediate permanent restoration | Stepwise removal if lesion deep; monitor | | Wolters et al. | Initial/mild pulpitis | Indirect pulp capping, selective removal, conservative restoration | Pulp preservation prioritized |   **Definitive Treatment Plan (Evidence-Supported)**  **1. Selective Caries Removal**   - Careful, conservative excavation of caries on the distal surface, especially as lesion is small and not near pulp12[11](https://britishendodonticsociety.org.uk/_userfiles/pages/files/duncan_et_al2019international_endodontic_journal.pdf). - If caries is deep but pulp is not exposed, leave affected but firm dentin at pulpal floor to prevent exposure[10](https://onlinelibrary.wiley.com/doi/10.1111/iej.13974)[11](https://britishendodonticsociety.org.uk/_userfiles/pages/files/duncan_et_al2019international_endodontic_journal.pdf).   **2. Protect and Seal**   - If needed, place a **biocompatible liner** (calcium silicate cement or glass ionomer) over the deepest part of the preparation[10](https://onlinelibrary.wiley.com/doi/10.1111/iej.13974)[11](https://britishendodonticsociety.org.uk/_userfiles/pages/files/duncan_et_al2019international_endodontic_journal.pdf). - Restore with high-quality adhesive composite to seal against microleakage12[11](https://britishendodonticsociety.org.uk/_userfiles/pages/files/duncan_et_al2019international_endodontic_journal.pdf).   **3. Avoid Pulp Exposure**   - Do NOT perform RCT or vital pulp therapy procedures unless:   - Unintended pulp exposure occurs or symptoms worsen despite conservative therapy.   **4. Follow-Up**   - **Immediate:** Assess postoperative sensitivity (should resolve). - **Recall at 6–12 months:** Re-test pulp vitality, monitor for any new symptoms or radiographic changes12[11](https://britishendodonticsociety.org.uk/_userfiles/pages/files/duncan_et_al2019international_endodontic_journal.pdf). - **Long-term:** Continual observation in routine dental visits.   **Prognosis & Patient Advice**   - Expect full resolution of sensitivity once the lesion is treated and a well-sealed restoration is placed. - Prognosis is excellent with adherence to conservative guidelines; risk of further pulpal complications is minimal112[10](https://onlinelibrary.wiley.com/doi/10.1111/iej.13974)[11](https://britishendodonticsociety.org.uk/_userfiles/pages/files/duncan_et_al2019international_endodontic_journal.pdf). - Advise the patient to report any new or lingering symptoms.   **Summary Table: Comparative Guidelines for Diagnosis and Management**   | **Society** | **Pulpal Diagnosis** | **Treatment Approach** | **Notes** | | --- | --- | --- | --- | | AAE | Reversible pulpitis | Remove caries, restore, monitor | Do not over-treat. RCT not indicated | | ESE | Reversible pulpitis | Selective caries removal, bio-liner | Prevent exposure; restoration critical | | IES | Mild symptomatic | Selective/stepwise removal, restore | Follow-up is vital | | Wolters | Initial/mild pulpitis | Indirect pulp capping, restore | Conservative, preserve pulp |   **Supporting Citations**   - Current AAE diagnostic terminology and treatment standards1[8](https://pmc.ncbi.nlm.nih.gov/articles/PMC9826047/)[2](https://www.aae.org/specialty/wp-content/uploads/sites/2/2017/07/endodonticdiagnosisfall2013.pdf)[9](https://www.aae.org/specialty/wp-content/uploads/sites/2/2017/07/aaeconsensusconferencerecommendeddiagnosticterminology.pdf)[3](https://jcda.ca/article/d90)[4](https://www.sciencedirect.com/science/article/pii/S0099239921005203)[5](https://www.aae.org/specialty/wp-content/uploads/sites/2/2023/12/Fall2013-EndoDiagnosis.pdf)[6](https://pmc.ncbi.nlm.nih.gov/articles/PMC11704326/)[15](https://www.aae.org/wp-content/uploads/2021/05/VitalPulpTherapyPositionStatement_v2.pdf)[11](https://britishendodonticsociety.org.uk/_userfiles/pages/files/duncan_et_al2019international_endodontic_journal.pdf). - ESE and international consensus on caries management and pulp preservation[10](https://onlinelibrary.wiley.com/doi/10.1111/iej.13974)[11](https://britishendodonticsociety.org.uk/_userfiles/pages/files/duncan_et_al2019international_endodontic_journal.pdf). - IES evidence-based protocols for deep and shallow caries12[13](https://ies.org.in/images/pdf/vital-pulp-therapy-ies-position-statement.pdf). - Contemporary philosophy emphasizes minimally invasive, biology-focused care14[6](https://pmc.ncbi.nlm.nih.gov/articles/PMC11704326/).   **In summary:** **Diagnosis:** Reversible pulpitis with normal apical tissues. **Definitive treatment:** Conservative caries removal, pulp-protective liner if indicated, high-quality restoration, and routine follow-up—root canal therapy is NOT indicated except in rare cases of progression. | **Comparative Diagnosis According to Different Recommendations**  **Case Summary**   - **Patient:** 25-year-old female - **Chief complaint:** Tooth #7 (upper left central incisor) sensitive to cold (sharp pain, subsides immediately, no spontaneous/lingering pain) - **Clinical findings:** Small carious lesion distal to an existing restoration, healthy periodontium, normal percussion/palpation - **Radiograph:** Lesion into dentin but not approaching pulp; no periapical or apical pathology   **Diagnostic Classification Comparison**  **AAE (American Association of Endodontists)**   - **Pulpal diagnosis:** **Reversible Pulpitis**   - Characterized by a short, sharp pain to cold stimulus that goes away quickly after the stimulus is removed, with no spontaneous or lingering pain[1](https://www.aae.org/specialty/wp-content/uploads/sites/2/2017/07/endodonticdiagnosisfall2013.pdf)[2](https://www.scribd.com/document/849743255/Diagnosis-Aae-Article-Summery-Cases)[3](https://en.wikipedia.org/wiki/Pulpitis)[4](https://pmc.ncbi.nlm.nih.gov/articles/PMC11991909/)[5](https://www.sciencedirect.com/topics/pharmacology-toxicology-and-pharmaceutical-science/pulpitis)[6](https://www.aae.org/specialty/wp-content/uploads/sites/2/2017/07/aaeconsensusconferencerecommendeddiagnosticterminology.pdf).   - The lesion is small and distant from pulp, pulp testing and symptoms consistent with reversible inflammation. - **Periapical diagnosis:** **Normal Apical Tissues**   - No response to percussion or palpation and radiographically healthy periapical structures.   **ESE (European Society of Endodontology)**   - **Pulpal Status:** **Reversible Pulpitis**   - Intermittent, short response to cold; no lingering pain, and lesion not involving the pulp chamber. - **Periapical Status:** **Normal**   - No clinical or radiographic evidence of periapical involvement[4](https://pmc.ncbi.nlm.nih.gov/articles/PMC11991909/).   **Indian Endodontic Society (IES) and Other Global Standards**   - **Diagnosis:** **Reversible Pulpitis or Early Dentin Hypersensitivity**   - Brief, stimulus-dependent sharp pain.   - Small carious lesion in dentin as etiology.   - No signs of irreversible pulpitis or periapical disease[2](https://www.scribd.com/document/849743255/Diagnosis-Aae-Article-Summery-Cases)[7](https://bmcoralhealth.biomedcentral.com/articles/10.1186/s12903-020-01199-z)[5](https://www.sciencedirect.com/topics/pharmacology-toxicology-and-pharmaceutical-science/pulpitis).   **Differentiation from Dentin Hypersensitivity**   - Dentin hypersensitivity also presents with **short, sharp pain** to cold/sweet stimuli, but is typically linked to exposed dentin and not caries per se; in this case, carious lesion is the likely etiology, not classic generalized dentin hypersensitivity[7](https://bmcoralhealth.biomedcentral.com/articles/10.1186/s12903-020-01199-z)[8](https://onlinelibrary.wiley.com/doi/10.1111/ors.12481).   **Comparative Treatment Recommendations**  **AAE/ESE/IES Consensus**   - **Restorative Management:**   - Remove all caries and restore the tooth with a definitive adhesive restoration (preferably composite resin)[9](https://www.nature.com/articles/s41368-022-00167-3).   - The restoration should be well-sealed to prevent microleakage and eliminate further stimulus to pulp. - **Management of Pulp:**   - No need for endodontic (root canal) treatment, as signs point to a healthy or reversibly inflamed pulp[1](https://www.aae.org/specialty/wp-content/uploads/sites/2/2017/07/endodonticdiagnosisfall2013.pdf)[3](https://en.wikipedia.org/wiki/Pulpitis)[5](https://www.sciencedirect.com/topics/pharmacology-toxicology-and-pharmaceutical-science/pulpitis)[6](https://www.aae.org/specialty/wp-content/uploads/sites/2/2017/07/aaeconsensusconferencerecommendeddiagnosticterminology.pdf).   - If direct pulp exposure occurs during caries removal, use biocompatible pulp-capping agents such as calcium silicate cements (MTA, Biodentine)[9](https://www.nature.com/articles/s41368-022-00167-3). - **Adjuncts:**   - If residual sensitivity occurs, recommend desensitizing toothpaste and monitor. Most cases resolve with restoration alone[10](https://pmc.ncbi.nlm.nih.gov/articles/PMC3927677/)[11](https://www.healthline.com/health/tooth-sensitive-to-hot-and-cold)[12](https://opendentistryjournal.com/VOLUME/16/ELOCATOR/e187421062201130/). - **Prevention & Hygiene:**   - Educate on oral hygiene and dietary choices to prevent future lesions.   **Definitive Treatment Plan**  **1. Clinical Steps**   - **Aseptic technique:** Use rubber dam isolation. - **Caries removal:** Excavate all soft carious dentin; preserve unaffected tooth structure. - **Restoration:**   - Place adhesive composite resin restoration.   - Ensure a good marginal seal to prevent recurrent caries and sensitivity. - **Pulp capping (if required):**   - If the pulp is nearly or actually exposed and bleeding is easily controlled, place a biocompatible material (e.g., MTA/Biodentine) before restoring.   **2. Patient Education**   - Advise that cold sensitivity should resolve after restoration. - Recommend desensitizing toothpaste if minor residual sensitivity persists[10](https://pmc.ncbi.nlm.nih.gov/articles/PMC3927677/)[11](https://www.healthline.com/health/tooth-sensitive-to-hot-and-cold)[13](https://dental-radlett.com/desensitising-treatments-help-tooth-sensitivity/)[12](https://opendentistryjournal.com/VOLUME/16/ELOCATOR/e187421062201130/). - Advise avoidance of highly acidic foods/beverages until symptom-free.   **3. Follow-up**   - **Re-evaluate in 2–4 weeks:** Ensure cold sensitivity has resolved and restoration is functioning well. - **Monitor annually:** Standard recall with radiographs to ensure caries control and pulpal health.   **Summary Table: Diagnostic and Treatment Comparison**   | **Recommendation Body** | **Pulpal Diagnosis** | **Treatment** | | --- | --- | --- | | AAE | Reversible pulpitis | Caries removal, definitive restoration | | ESE | Reversible pulpitis | Caries removal, monitor, restore | | IES | Reversible pulpitis | Restore, monitor, educate | | Dentin Sensitivity | Exposed dentin/lesion | Desensitizing agents, restore if carious[10](https://pmc.ncbi.nlm.nih.gov/articles/PMC3927677/) |   **Key Takeaway:** The consensus is clear: **reversible pulpitis** is diagnosed; the definitive treatment is conservative — caries removal and adhesive restoration, with no need for endodontic intervention unless symptoms worsen or pulp exposure occurs. Most patients recover with swift, conservative care and good oral hygiene | **Comparative Diagnosis According to Guidelines and Classification Systems**  **Case Synopsis**   - **Patient**: 25-year-old female - **Chief complaint**: Cold sensitivity in upper left central incisor (tooth #7) - **Symptoms**: Intermittent, sharp pain to cold; no lingering pain; no spontaneous or night pain - **Clinical and Radiographic Findings**:   - Small carious lesion on distal surface (extends into dentin, not near the pulp)   - Pre-existing small, intact composite restoration   - No periapical or PDL changes   - No percussion or palpation tenderness   - Gingiva healthy   **AAE (American Association of Endodontists) Classification**   - **Pulpal Diagnosis**: *Reversible Pulpitis*   - Triggered, sharp pain to cold that resolves immediately after stimulus removal is a hallmark of reversible pulpitis[1](https://pmc.ncbi.nlm.nih.gov/articles/PMC9826047/)[2](https://www.aae.org/specialty/wp-content/uploads/sites/2/2017/07/endodonticdiagnosisfall2013.pdf)[3](https://jcda.ca/article/d90).   - No spontaneous pain, no lingering sensitivity, and no radiographic pathology. - **Periapical Diagnosis**: *Normal Apical Tissues*   - No tenderness, no radiographic changes[2](https://www.aae.org/specialty/wp-content/uploads/sites/2/2017/07/endodonticdiagnosisfall2013.pdf)[4](https://pmc.ncbi.nlm.nih.gov/articles/PMC8272274/)[3](https://jcda.ca/article/d90).   **ESE (European Society of Endodontology) Guidelines**   - **Diagnosis**: *Reversible Pulpitis*   - Clinical and radiographic signs indicate minor, self-limiting inflammation capable of healing if the irritant is removed[5](https://onlinelibrary.wiley.com/doi/10.1111/iej.13974)[6](https://pmc.ncbi.nlm.nih.gov/articles/PMC9306596/)[7](https://onlinelibrary.wiley.com/doi/full/10.1111/iej.14067).   - Recommended to preserve pulp vitality with selective caries removal (if caries is not very deep) and immediate restoration[5](https://onlinelibrary.wiley.com/doi/10.1111/iej.13974)[6](https://pmc.ncbi.nlm.nih.gov/articles/PMC9306596/). - **Criteria**:   - Caries confined to outer dentin, no pulpal exposure, sharp but transient pain, normal periapical tissues[5](https://onlinelibrary.wiley.com/doi/10.1111/iej.13974)[6](https://pmc.ncbi.nlm.nih.gov/articles/PMC9306596/)[7](https://onlinelibrary.wiley.com/doi/full/10.1111/iej.14067).   **Indian Endodontic Society (IES) Guidelines**   - **Diagnosis**: *Reversible Pulpitis*   - Pain induced by stimulus, resolves quickly, minor caries not close to the pulp[8](https://ies.org.in/images/pdf/vital-pulp-therapy-ies-position-statement.pdf)[9](https://www.ies.org.in/images/pdf/ies-times-2024-vol-3-issue-2.pdf).   - Advocates conservative caries removal, vital pulp therapy (if deeper), and bioactive restorative materials[8](https://ies.org.in/images/pdf/vital-pulp-therapy-ies-position-statement.pdf).   **Summary Table**   | **Organization** | **Pulpal Diagnosis** | **Periapical Diagnosis** | **Treatment Protocol** | | --- | --- | --- | --- | | AAE | Reversible pulpitis[1](https://pmc.ncbi.nlm.nih.gov/articles/PMC9826047/)[2](https://www.aae.org/specialty/wp-content/uploads/sites/2/2017/07/endodonticdiagnosisfall2013.pdf)[4](https://pmc.ncbi.nlm.nih.gov/articles/PMC8272274/)[3](https://jcda.ca/article/d90)[10](https://mtnviewendo.com/aae-dx-terminology/)[11](https://www.tv-endo.com/root-canals/aae-dx-terminology) | Normal apical tissue | Remove caries + restore, monitor | | ESE | Reversible pulpitis[5](https://onlinelibrary.wiley.com/doi/10.1111/iej.13974)[6](https://pmc.ncbi.nlm.nih.gov/articles/PMC9306596/)[7](https://onlinelibrary.wiley.com/doi/full/10.1111/iej.14067) | Normal apical tissue | Selective caries removal + restoration | | IES | Reversible pulpitis[8](https://ies.org.in/images/pdf/vital-pulp-therapy-ies-position-statement.pdf)[9](https://www.ies.org.in/images/pdf/ies-times-2024-vol-3-issue-2.pdf) | Not specifically detailed | Conservative caries and pulp preservation, restoration |   **Definitive Treatment Plan (Synthesis of Recommendations)**  **1. Caries Management**   - Remove the small carious lesion using conservative preparation:   - *If caries is shallow/moderate* and no pulpal exposure occurs, restore directly.   - Use magnification and rubber dam for isolation[2](https://www.aae.org/specialty/wp-content/uploads/sites/2/2017/07/endodonticdiagnosisfall2013.pdf)[5](https://onlinelibrary.wiley.com/doi/10.1111/iej.13974).   **2. Restorative Protocol**   - Place a well-sealed, high-quality restoration (composite preferred). - If base/liner is needed for deeper dentin, a **calcium silicate-based material** (e.g., Biodentine or MTA) can be used as a liner due to its bioactive properties and pulp healing potential[12](https://pmc.ncbi.nlm.nih.gov/articles/PMC4485218/)[13](https://www.aapd.org/globalassets/media/policies_guidelines/g_vpt-2024.pdf)[14](https://www.nature.com/articles/s41598-024-52818-6).   **3. Vital Pulp Protection**   - *If, during operative procedure, there are signs the pulp is close but not exposed,* use an indirect pulp capping technique with calcium silicate cement[12](https://pmc.ncbi.nlm.nih.gov/articles/PMC4485218/)[13](https://www.aapd.org/globalassets/media/policies_guidelines/g_vpt-2024.pdf). - *If small pulp exposure occurs without persistent bleeding,* direct pulp capping with a bioactive material may be considered[8](https://ies.org.in/images/pdf/vital-pulp-therapy-ies-position-statement.pdf)[12](https://pmc.ncbi.nlm.nih.gov/articles/PMC4485218/)[13](https://www.aapd.org/globalassets/media/policies_guidelines/g_vpt-2024.pdf).   **4. Follow-up**   - Monitor sensitivity: Most cases fully resolve after caries and restoration placement. - Review clinically and radiographically at 6–12 months to ensure asymptomatic and pulp vitality is maintained[2](https://www.aae.org/specialty/wp-content/uploads/sites/2/2017/07/endodonticdiagnosisfall2013.pdf)[5](https://onlinelibrary.wiley.com/doi/10.1111/iej.13974).   **5. Patient Counseling**   - Explain transient nature of symptoms, very high prognosis (>95% success at 1 year for these approaches)[13](https://www.aapd.org/globalassets/media/policies_guidelines/g_vpt-2024.pdf). - Advise patient to return if pain becomes lingering, spontaneous, or if new symptoms arise.   **6. No Need for Root Canal Therapy**   - According to all guidelines, **root canal therapy is not indicated** unless symptoms worsen or pulpal condition deteriorates[1](https://pmc.ncbi.nlm.nih.gov/articles/PMC9826047/)[2](https://www.aae.org/specialty/wp-content/uploads/sites/2/2017/07/endodonticdiagnosisfall2013.pdf)[5](https://onlinelibrary.wiley.com/doi/10.1111/iej.13974)[9](https://www.ies.org.in/images/pdf/ies-times-2024-vol-3-issue-2.pdf).   **Key Points & Rationale**   - **Diagnosis is classically reversible pulpitis**: sharp, short, stimulus-related pain with no clinical or radiographic evidence of irreversible inflammation or pulpal necrosis. - **All contemporary guidelines** (AAE, ESE, IES) support conservative tooth and pulp management, emphasizing the potential to heal and return to normal function if the irritant is eliminated. - **Use of bioactive materials** for restorative base/liner provides added benefit but is not strictly required for shallow lesions[12](https://pmc.ncbi.nlm.nih.gov/articles/PMC4485218/)[13](https://www.aapd.org/globalassets/media/policies_guidelines/g_vpt-2024.pdf). - **Regular monitoring** ensures detection of any adverse progression.   **In summary:** This is a prototypical case of reversible pulpitis with normal apical tissues, best managed with conservative caries removal, placement of a well-sealed restoration, and close follow-up. All sources favor this preservation-based approach, avoiding aggressive intervention and prioritizing long-term pulp health and function |
| 2 | **Comparative Diagnosis and Recommendations: Deep Caries, Pain on Biting, Pulp Vitality Intact**  **Case Recap**   - **40-year-old male, tooth #35 (lower right molar)** - **Chief complaint**: Sharp, localized pain when chewing hard foods - No spontaneous pain or temperature sensitivity - **Clinical**: Deep carious lesion under large restoration, no visible cracks/fractures, tenderness to percussion, positive cold and EPT tests (vital pulp), positive bite test - **Radiograph**: Deep caries close to pulp, no exposure, no periapical lucency or PDL widening   **Comparative Diagnostic Classification**  **AAE (American Association of Endodontists)**   - **Pulpal Diagnosis**: Normal or *Reversible Pulpitis*   - Brief, non-lingering pain to cold, no spontaneous symptoms   - Vital responses to cold/EPT   - Etiology: Deep caries, marginal breakdown of restoration - **Periapical Diagnosis**: *Symptomatic Apical Periodontitis*   - Pain on biting/chewing, tenderness to percussion   - No radiographic apical pathology   **ESE (European Society of Endodontology)**   - **Diagnosis**: *Reversible Pulpitis with Early Apical Periodontitis*   - Deep caries approximating the pulp but no exposure   - Reversible symptoms, no lingering pain, normal vitality response   - Early apical inflammation inferred clinically (bite/percussion pain)   **Indian Endodontic Society (IES)**   - **Diagnosis**: *Mild symptomatic pulpal changes* (reversible pulpitis)   - Cold/EPT positive, pain only on stimulus (short duration), no spontaneous or lingering pain - **Classification**: Deep lesion, but falls within the criteria for conservative management1   **Contemporary and Minimally Invasive Classifications**   - *Symptomatic tooth with vital pulp, no clinical or radiographic evidence of irreversible damage*. - "Cracked tooth" or incomplete fracture excluded based on absence of clinical/radiographic signs.   **Comparative Treatment Recommendations**   | **Guideline/Organization** | **Recommended Diagnosis & Main Approach** | | --- | --- | | **AAE** | Reversible pulpitis with symptomatic apical periodontitis. Remove caries & restore. | | **ESE** | Selective or stepwise caries removal. Indirect pulp capping if risk of pulp exposure. | | **IES** | Selective caries removal, avoid pulp exposure, indirect pulp capping with bioactive liner. | | **Recent Literature** | Maintain pulp vitality whenever possible, use biologic/adhesive restoration, close follow-up. |   **Key Agreements:**   - **Complete caries removal from peripheral walls;** selectively remove deepest caries to avoid exposure12. - **Indirect pulp capping/lining** with a bioactive material (calcium silicate cement like MTA or Biodentine) if pulp not exposed3[4](https://www.giornaleitalianoendodonzia.it/gie/article/download/476/254/5778). - **Immediate, well-sealed permanent restoration** (preferably adhesive composite). - **Rubber dam isolation and aseptic technique** are mandatory. - **Full pulpotomy or RCT NOT indicated** unless symptoms worsen or exposure with irretrievable bleeding occurs15.   **Divergences/Contingencies:**   - If pulp is inadvertently exposed, **direct pulp capping** may be attempted if hemorrhage is easily controlled and pulp tissue appears healthy. Otherwise, **partial or full pulpotomy** considered if more extensive inflammation is found125. - Stepwise excavation (two-visit): Option if operator is concerned about immediate exposure risk2[6](https://onlinelibrary.wiley.com/doi/10.1111/iej.13128).   **Evidence-Based Definitive Treatment Plan**  **Step 1: Diagnosis Confirmation and Consent**   - Review chief complaint, positive cold and EPT (vital pulp); sharp pain on biting suggests early apical inflammation, often from deep caries or restoration failure and/or possible dentin microcracks. - Explain conservative rationale and prognosis to patient.   **Step 2: Initial Management (Visit 1)**   - **Aseptic technique, rubber dam isolation mandatory** - **Remove caries from periphery first**, using slow-speed burs and careful hand excavation. Leave softest dentin pulpal wall until last - **Selective caries removal**: If hard or firm dentin remains pulpal, and exposure is avoided, proceed with liner/base. If very thin dentin (<0.5 mm), indirect pulp capping is advised. - **If exposure risk is high**: Stepwise (two-visit) approach is reasonable—restore temporarily, reenter in 6–8 weeks if indicated1[7](https://pmc.ncbi.nlm.nih.gov/articles/PMC9831703/)[4](https://www.giornaleitalianoendodonzia.it/gie/article/download/476/254/5778).   **Step 3: Pulp Protection and Restoration**   - **Indirect pulp capping**: Place hydraulic calcium silicate-based liner (e.g., MTA, Biodentine) over deepest dentin and seal with resin-modified glass ionomer if appropriate[8](https://www.giornaleitalianoendodonzia.it/gie/article/view/476)3. - **Definitive restoration**: Bonded composite preferred for occlusal stability, or composite/onlay/crown as dictated by amount of tooth structure; avoid microleakage. - **Check occlusion**: Remove possible occlusal contacts exacerbating biting pain.   **Step 4: Follow-up Protocol**   - **Monitoring period**: Recall in 1–2 weeks to ensure pain/symptom resolution and assess pulp vitality. - **Subsequent follow-up**: Clinical and radiographic review at 6-12 months, and then annually213. - **Signs of failure**: If spontaneous pain, lingering pain to cold, necrotic response, or periapical pathosis develops—reassess for possible pulpectomy/RCT.   **Expert Notes & Prognosis**   - **Success rates** for indirect pulp capping and selective caries removal exceed 85–90% over 1–2 years if proper technique/materials/seal are used23. - Avoids unnecessary RCT and preserves tooth structure. - **Immediate RCT is NOT indicated** if pulp tests are vital, symptoms are stimulus-bound, and no irreversible findings.   **Summary Table: Diagnosis & Treatment Comparison**   | **Classification Body** | **Pulpal Diagnosis** | **Periapical Diagnosis** | **Main Treatment Recommendation** | | --- | --- | --- | --- | | AAE | Reversible pulpitis | Symptomatic apical perio | Selective caries removal, indirect pulp capping, restore | | ESE | Reversible (or mild) pulpitis | Early symptomatic apical perio | Selective one- or two-step removal, bioactive liner, restore | | IES | Mild symptomatic changes (reversible) | Not specified | Selective/stepwise approach, avoid exposure, indirect capping | | Literature | Reversible pulpitis | Early apical inflammation | Maintain pulp vitality, minimally invasive/maximal preservation |   **References (from uploaded and recent authoritative literature):**   - 1 Indian Endodontic Society guidelines and position statement - 2 European Society of Endodontology consensus and S3-level guidelines - 3[4](https://www.giornaleitalianoendodonzia.it/gie/article/download/476/254/5778) Recent vital pulp therapy reviews and clinical studies - 5 AAE Position Statement on Vital Pulp Therapy   **In summary:** This case represents symptomatic apical periodontitis secondary to deep caries with reversible pulpitis. All major guidelines (AAE, ESE, IES, contemporary literature) agree that preserving pulp vitality with selective caries removal and indirect pulp capping using a bioactive liner, followed by a high-quality restoration, is the standard of care. The prognosis is excellent if the tooth is properly restored and monitored. Root canal should be reserved only for clear pulpal or periapical breakdown. | **Comparative Diagnosis According to Guidelines and Classification Systems**  **Case Synopsis**   - **Patient**: 40-year-old male - **Chief complaint**: Sharp pain upon biting/chewing on tooth #35 (lower right molar) - **Symptoms**: No spontaneous pain, no temperature sensitivity, pressure-induced pain only - **Findings**: Deep carious lesion under large restoration, no visible cracks, tender to percussion, vital pulp (normal response to cold/EPT), no periapical or PDL pathology   **AAE (American Association of Endodontists) Classification**   - **Pulpal Diagnosis**: *Reversible Pulpitis* or *Normal Pulp*   - Normal, brief response to cold and positive EPT indicates a healthy or minimally inflamed pulp.   - The pain on biting, in the absence of thermal symptoms, is usually due to mechanical irritation (e.g., high restoration, crack, or caries impinging on dentin/pulp) rather than pulpal necrosis or irreversible pulpitis[1](https://www.aae.org/specialty/wp-content/uploads/sites/2/2017/07/endodonticdiagnosisfall2013.pdf)[2](https://www.augusta.edu/dentaltable/pdfs/goals/relievepain/diagnosingPatient5.pdf)[3](https://pmc.ncbi.nlm.nih.gov/articles/PMC9145630/). - **Periapical Diagnosis**: *Normal Apical Tissues*   - No radiographic changes or spontaneous pain.   **ESE (European Society of Endodontology) Guidelines**   - **Diagnosis**: *Reversible Pulpitis* with deep caries (without pulpal involvement)   - Localized, stimulus-dependent pain (chewing) with normal pulp sensibility tests.   - Emphasizes complete caries removal with preservation of pulp vitality[4](https://www.frontiersin.org/journals/dental-medicine/articles/10.3389/fdmed.2022.1048137/full). - **Criteria**:   - Conservative caries removal, restoration integrity, and follow-up are central in ESE guidelines.   **Indian Endodontic Society (IES) & Contemporary Approaches**   - **Diagnosis**: *Reversible Pulpitis or Dentinal Sensitivity*   - Pain limited to chewing/biting and not associated with thermal or spontaneous symptoms is commonly caused by exposed dentin, caries near the pulp, or a failing restoration.   - Sensibility and vitality tests remain normal, and clinical focus is on restoring tooth integrity to prevent pulpal progression[3](https://pmc.ncbi.nlm.nih.gov/articles/PMC9145630/)[5](https://pmc.ncbi.nlm.nih.gov/articles/PMC4590084/). - **Guidance**:   - Remove the source (e.g., caries, defective filling) and restore to prevent further pulpal injury.   **Key Differential Considerations**   - *Cracked Tooth Syndrome* would be suspected with pain to biting but no visible crack was found here, so the primary diagnosis remains mechanical/structural injury with a vital pulp[6](https://www.perioimplantadvisory.com/restorative-dentistry/article/14284062/how-can-you-tell-if-a-root-is-fractured)[7](https://www.sciencedirect.com/topics/medicine-and-dentistry/cracked-tooth-syndrome). - *Symptomatic Apical Periodontitis* would only be diagnosed with radiographic or percussion findings, neither of which are present.   **Definitive Treatment Plan (Synthesized from Guidelines)**  **1. Caries and Restoration Management**   - **Complete caries removal** is recommended to accurately assess and eliminate the etiologic factor[1](https://www.aae.org/specialty/wp-content/uploads/sites/2/2017/07/endodonticdiagnosisfall2013.pdf)[4](https://www.frontiersin.org/journals/dental-medicine/articles/10.3389/fdmed.2022.1048137/full). - Remove the failing or broken restoration completely before assessing the dentin and pulp status. - **Check for hidden cracks** under the restoration after removal, even if none are visible currently.   **2. Pulp Preservation & Restoration**   - Assuming no pulpal exposure:   - **Selective or total caries removal** as tolerated, using magnification and a rubber dam for isolation.   - If remaining dentin thickness is reduced but pulp not exposed, place a bioactive liner (e.g., calcium silicate cement). - **Restore the cavity** with a well-sealed, durable material (composite resin or amalgam, depending on the situation)[4](https://www.frontiersin.org/journals/dental-medicine/articles/10.3389/fdmed.2022.1048137/full). - If, during restoration, **pulp exposure occurs** but the tissue is healthy:   - Consider direct pulp capping with calcium silicate cement.   - If there is persistent bleeding or signs of irreversible inflammation, proceed with vital pulp therapy or root canal as indicated.   **3. Occlusion Check**   - Ensure restored tooth is not in hyperocclusion—adjust the restoration if any prematurities are present, as high spots can cause bite pain.   **4. Short-Term Follow-up**   - Review the tooth in 1–2 weeks for resolution of symptoms. - Resolution of bite pain post-restoration confirms the diagnosis and success of the conservative approach.   **5. Longer-term Monitoring**   - Confirm continued vitality and absence of any delayed symptoms (such as thermal pain or swelling). - Periodic radiographs may be indicated if any doubt arises.   **6. Patient Counseling**   - Explain the nature of reversible pulpitis/mechanical injury and high prognosis with restoration (>95%). - Advise the patient to return if symptoms change—especially if pain becomes spontaneous, persistent, or is accompanied by swelling. - There is *no need for root canal therapy* unless symptoms progress to irreversible pulpitis or necrosis (rare if managed promptly).   **Key Points & Rationale**   - **Diagnosis favors reversible pulpitis with a vital pulp**, caused by deep caries under a failing restoration—no evidence for irreversible pulpitis or necrosis. - **All guidelines (AAE, ESE, IES)** favor conservative management: removal of the cause (caries, restoration) and preservation of pulp vitality, with close follow-up[1](https://www.aae.org/specialty/wp-content/uploads/sites/2/2017/07/endodonticdiagnosisfall2013.pdf)[8](https://my.clevelandclinic.org/health/diseases/23536-pulpitis)[4](https://www.frontiersin.org/journals/dental-medicine/articles/10.3389/fdmed.2022.1048137/full). - Use of **bioactive restorative materials** is appropriate if the pulp is close to being exposed. - **Cracked tooth syndrome** should be ruled out after removal of the restoration, but absent clinical evidence, standard caries management is most appropriate. - **Prognosis is excellent**: Conservative restoration of structurally compromised teeth with healthy pulp is highly successful.   **Summary:** This case is best managed with complete caries (and failing restoration) removal and immediate, well-sealed restoration, in line with international and national guidelines. Pulp vitality should be preserved, and the need for root canal therapy is only if symptoms worsen. Regular monitoring ensures successful healing and early detection of rare adverse changes. | **Comparative Diagnosis According to Guidelines and Classification Systems**  **Case Summary**   - **Patient**: 40-year-old male - **Chief complaint**: Sharp, localized pain upon biting on lower right molar (#35), especially with hard foods. - **Symptoms**: No spontaneous pain, no thermal sensitivity, pain only with pressure. - **Clinical findings**: Deep carious lesion undermining large existing restoration, percussion and bite tenderness, no visible cracks, otherwise healthy periodontium. - **Tests**: Normal, brief response to cold; positive EPT (vital pulp); pain on biting. - **Radiographs**: Deep caries close to but not exposing the pulp, no periapical radiolucency, PDL space normal, restoration breakdown.   **Diagnostic Comparative Review**  **AAE (American Association of Endodontists)**   - **Pulpal Diagnosis**: **Reversible Pulpitis**   - Pain only on biting, quick cold response returning to baseline, no spontaneous or lingering pain. Deep caries present but pulp remains vital[1](https://pmc.ncbi.nlm.nih.gov/articles/PMC12165973/). - **Periapical Diagnosis**: **Normal Apical Tissues**   - No radiographic signs of PDL widening or periapical pathology. - **Comment**: Pain upon biting suggests possible reversible pulpitis or "cracked tooth," but no cracks seen and caries is primary etiology.   **ESE (European Society of Endodontology) Guidelines**   - **Diagnosis**: **Deep Carious Lesion—Reversible Pulpitis**   - Deep caries, asymptomatic except mechanical (biting) pain. Cold response is sharp and transient, PDL and periapex normal[2](https://britishendodonticsociety.org.uk/_userfiles/pages/files/duncan_et_al2019international_endodontic_journal.pdf)[1](https://pmc.ncbi.nlm.nih.gov/articles/PMC12165973/).   - ESE recommends selective or stepwise caries removal for deep lesions, preserving vital pulp tissue wherever possible. - **Bite Pain**: Often caused by inflammation of coronal pulp from caries or microleakage around restoration[2](https://britishendodonticsociety.org.uk/_userfiles/pages/files/duncan_et_al2019international_endodontic_journal.pdf). - **Ancillary Notes**: Full pulpotomy or root canal not indicated unless pulpal or periapical symptoms worsen or pulp is exposed during caries removal.   **Contemporary Evidence & IES Guidelines**   - **Diagnosis**: **Reversible Pulpitis with Possible Occlusal/Restorative/Thermal Influence**   - Indian Endodontic Society (IES) and recent literature agree: brief and stimulus-dependent pain with vital pulp and no spontaneous symptoms is reversible[3](https://pmc.ncbi.nlm.nih.gov/articles/PMC11108425/)[1](https://pmc.ncbi.nlm.nih.gov/articles/PMC12165973/)[4](https://www.frontiersin.org/journals/dental-medicine/articles/10.3389/fdmed.2022.1048137/full).   - Pain on biting may reflect high restoration or carious undermining, not necessarily irreversible pulpitis.   **Summary Table**   | **Guideline** | **Pulpal Diagnosis** | **Periapical Status** | **Treatment Recommendation** | | --- | --- | --- | --- | | AAE | Reversible pulpitis | Normal apical tissue | Remove caries, restore, monitor[1](https://pmc.ncbi.nlm.nih.gov/articles/PMC12165973/) | | ESE | Reversible pulpitis | Normal tissue | Selective/stepwise caries removal & restoration[2](https://britishendodonticsociety.org.uk/_userfiles/pages/files/duncan_et_al2019international_endodontic_journal.pdf) | | IES | Reversible pulpitis | Normal tissue | Conservative, vital pulp preservation[3](https://pmc.ncbi.nlm.nih.gov/articles/PMC11108425/) |   **Comparative Evidence—Selected Key Points**   - **Cold-Positive, Brief Response**: Strongly correlated with reversible pulpitis and good prognosis for pulp preservation as long as no spontaneous/l lingering pain develops[1](https://pmc.ncbi.nlm.nih.gov/articles/PMC12165973/). - **Pain on Biting Only**: Frequent with deep caries undermining a restoration, but no thermal or lingering pain means irreversible pulpitis is less likely[2](https://britishendodonticsociety.org.uk/_userfiles/pages/files/duncan_et_al2019international_endodontic_journal.pdf)[1](https://pmc.ncbi.nlm.nih.gov/articles/PMC12165973/). - **No Cracks/Fractures**: Rules out cracked tooth syndrome as primary etiology. - **No Periapical Changes**: Suggests early or limited pulpal inflammation with no spread to apical tissues. - **Restorative Influence**: Marginal breakdown and recurrent caries may allow bacterial leakage, causing pulp inflammation and pain on function[2](https://britishendodonticsociety.org.uk/_userfiles/pages/files/duncan_et_al2019international_endodontic_journal.pdf)[1](https://pmc.ncbi.nlm.nih.gov/articles/PMC12165973/).   **Definitive Treatment Plan (Synthesized, Evidence-Based)**  **1. Pre-Operative Assessment**   - Confirm diagnosis with repeated pulp testing, careful bite analysis, and close review for subtle cracks (magnification, transillumination) if symptoms persist after restoration.   **2. Caries and Restoration Management**   - Remove all caries and failed restorative material using selective or stepwise approach to avoid unnecessary pulp exposure[2](https://britishendodonticsociety.org.uk/_userfiles/pages/files/duncan_et_al2019international_endodontic_journal.pdf)[1](https://pmc.ncbi.nlm.nih.gov/articles/PMC12165973/). - If the lesion is very deep, consider indirect pulp capping with a calcium silicate liner (e.g., Biodentine/MTA) before restoration[5](https://pmc.ncbi.nlm.nih.gov/articles/PMC6174009/)[3](https://pmc.ncbi.nlm.nih.gov/articles/PMC11108425/)[4](https://www.frontiersin.org/journals/dental-medicine/articles/10.3389/fdmed.2022.1048137/full). - Rubber dam isolation and aseptic technique essential. - Immediate definitive restoration with composite or suitable material following modern adhesive protocols.   **3. Vital Pulp Therapy (If Needed)**   - If there’s a (small) mechanical or carious pulp exposure, and pulp appears healthy/vital:   - Direct pulp capping or shallow pulpotomy with biocompatible cement (Biodentine/MTA)[2](https://britishendodonticsociety.org.uk/_userfiles/pages/files/duncan_et_al2019international_endodontic_journal.pdf)[3](https://pmc.ncbi.nlm.nih.gov/articles/PMC11108425/)[4](https://www.frontiersin.org/journals/dental-medicine/articles/10.3389/fdmed.2022.1048137/full).   - Restore permanently in same visit if possible. - If bleeding is excessive or exposure is large and uncontrollable: reassess for pulpotomy or, as a last resort, endodontic therapy.   **4. Follow-Up & Monitoring**   - Clinical review at 6-8 weeks for symptom resolution and pulp vitality. - Repeat radiographs at 6-12 months. - Longer-term monitoring to ensure no progression to apical pathology or irreversible pulpitis.   **5. Patient Counseling**   - Explain reversibility of current condition and vital pulp preservation strategies. - Advise: return promptly if spontaneous, lingering pain or swelling develops (possible sign of pulpal progression). - Stress importance of follow-up and excellent oral hygiene.   **Key Points and Prognosis**   - **All modern guidelines (AAE, ESE, IES, evidence reviews) agree:** In a tooth with deep caries, reversible biting pain, brief cold response, and a vital pulp, the gold standard is **conservative caries removal and immediate restoration**, preserving the pulp[2](https://britishendodonticsociety.org.uk/_userfiles/pages/files/duncan_et_al2019international_endodontic_journal.pdf)[1](https://pmc.ncbi.nlm.nih.gov/articles/PMC12165973/)[3](https://pmc.ncbi.nlm.nih.gov/articles/PMC11108425/)[4](https://www.frontiersin.org/journals/dental-medicine/articles/10.3389/fdmed.2022.1048137/full). - **Prognosis:** Success rates >90% for maintaining pulpal health and function if bioactive materials are used in deep restorations and strict operative protocols are followed[4](https://www.frontiersin.org/journals/dental-medicine/articles/10.3389/fdmed.2022.1048137/full)[3](https://pmc.ncbi.nlm.nih.gov/articles/PMC11108425/). - **No endodontic treatment needed** unless clinical/radiographic signs of irreversible pulpitis or infection emerge on review. - **Vital pulp therapy** is increasingly supported by robust evidence, especially for deep-caries cases without irreversible symptoms[4](https://www.frontiersin.org/journals/dental-medicine/articles/10.3389/fdmed.2022.1048137/full)[2](https://britishendodonticsociety.org.uk/_userfiles/pages/files/duncan_et_al2019international_endodontic_journal.pdf)[3](https://pmc.ncbi.nlm.nih.gov/articles/PMC11108425/).   **In summary:** This is a classic case of reversible pulpitis due to deep carious lesion and failing restoration, best managed with conservative caries removal, use of modern pulp-protective materials if needed, and definitive well-sealed restoration. All major guidelines recommend this evidence-based, pulp-preserving approach, with root canal treatment reserved only for failure or disease progression. |
| 3 | **Comparative Diagnosis According to Major Guidelines**  **Case Overview**   - **Patient**: 30-year-old female - **Chief Complaint**: Sensitivity to cold in upper right canine (tooth #6) - **Symptoms**: Sharp, fleeting pain to cold stimuli, subsides immediately after stimulus is removed. No spontaneous, lingering, or biting pain. - **Clinical Findings**: Small carious lesion on mesial surface near a small, intact composite; no cracks, fractures, or other pathology. - **Vitality Tests**: Cold test shows sharp, transient pain; percussion and bite negative. - **Radiographs**: Caries extends into dentin but not near the pulp. No apical or periapical pathology, existing restoration well-adapted.   **Diagnostic Classification Across Systems**   | **Guideline/Organization** | **Pulpal Diagnosis** | **Reasoning** | | --- | --- | --- | | **AAE (American Association of Endodontists)** | Reversible pulpitis | Sharp, stimulus-related, transient pain only to cold; no spontaneous/lingering pain; no periapical changes12. | | **ESE (European Society of Endodontology)** | Reversible pulpitis | Pain only upon stimulus, resolving immediately; lesion not close to pulp; normal PDL34. | | **Indian Endodontic Society (IES)** | Reversible pulpitis | Mild, short, stimulus-dependent pain; pulp is vital and radiographic signs normal; focus on pulp preservation5. | | **Wolters et al. Minimally Invasive** | Healthy/minimally inflamed | No symptoms of irreversible pulpitis, minimal intervention indicated6. |   **Treatment Recommendations**   | **Guideline/Organization** | **Recommended Approach** | | --- | --- | | **AAE** | Remove caries with rubber dam isolation; restore; avoid pulp exposure; monitor12. | | **ESE** | Selective/stepwise caries removal; avoid pulp exposure; use bioactive liner if needed; immediate restoration34. | | **IES** | Conservative excavation; use calcium silicate liner if close to pulp; seal with high-quality restoration; follow-up5. | | **Wolters et al.** | Minimal intervention; regular monitoring; intervene further only if symptoms arise6. |   **Definitive Step-by-Step Treatment Plan**   1. **Preoperative Assessment**    - Confirm diagnosis with clinical pulp tests, check radiographs.    - Achieve rubber dam isolation before operative work. 2. **Caries Removal**    - Remove caries conservatively, aiming to avoid pulp exposure.    - Use magnification for precise caries assessment. 3. **If No Pulp Exposure:**    - Place a **bioactive liner** (calcium silicate cement, e.g., Biodentine/MTA) if lesion is near pulp.    - Immediately restore with a durable direct or indirect restoration (composite preferred). 4. **If Pulp Exposure Occurs (Unexpectedly):**    - Assess for healthy pulp tissue and control bleeding (achievable within 5–10 minutes).    - If criteria are met, perform direct pulp capping with a hydraulic calcium silicate cement, restore immediately.    - If uncontrolled bleeding or signs of irreversible pulpitis, reconsider for root canal therapy. 5. **Final Steps**    - Finish restoration; adjust occlusion.    - Radiographic baseline for future comparison. 6. **Follow-Up**    - Clinical/radiographic evaluation at 6 and 12 months, then yearly as appropriate.    - Check for symptoms, restoration integrity, and maintenance of pulp vitality. 7. **Patient Counseling**    - Explain diagnosis and conservative rationale.    - Emphasize the high success rate of pulp preservation (>90% in similar cases).    - Advise on prompt return if pain becomes lingering, spontaneous, or symptoms change.   **Key Rationale (Based on Comparative Guidelines)**   - **Diagnosis is classic reversible pulpitis:** transient, stimulus-related pain only. - **All guidelines** favor conservative caries removal, preservation of the pulp, and **avoidance of overtreatment**. - **Bioactive liners** (calcium silicates) are recommended only if close to pulp for added protection. - **No root canal therapy** is indicated; if exposure is avoided and symptoms resolve post-restoration, long-term prognosis is excellent5342.   **In summary:** This case is managed optimally with conservative caries removal, placement of a high-quality restoration (using a liner if close to pulp), and diligent follow-up. All major endodontic organizations and contemporary evidence strongly support this preservation-focused, minimally invasive approach for reversible pulpitis due to a small carious lesion | **Comparative Diagnosis According to Major Guidelines**  **Case Overview**   - **Patient:** 30-year-old female - **Tooth:** #6 (upper right canine) - **Symptoms:** Sharp, fleeting cold sensitivity; no lingering pain, spontaneous pain, or pain on biting. - **Findings:** Small carious lesion into dentin (not pulpal), healthy periodontium, no tenderness to percussion/palpation, normal radiograph, intact pre-existing restoration.   **AAE (American Association of Endodontists)**   - **Diagnosis:** **Reversible Pulpitis**   - Stimulus-dependent, sharp, transient pain to cold consistent with reversible pulpitis.   - No spontaneous pain or lingering discomfort after removal of stimulus.   - Etiology: Minor carious lesion or exposed dentin. - **Recommended Treatment:**   - Removal of caries and placement of a well-sealed restoration.   - No endodontic therapy indicated unless symptoms progress or change[1](https://www.aae.org/specialty/wp-content/uploads/sites/2/2017/07/endodonticdiagnosisfall2013.pdf)[2](https://pmc.ncbi.nlm.nih.gov/articles/PMC9826047/)[3](https://www.aae.org/specialty/wp-content/uploads/sites/2/2017/07/aaeconsensusconferencerecommendeddiagnosticterminology.pdf).   **ESE (European Society of Endodontology)**   - **Diagnosis:** **Reversible Pulpitis**   - Mild sensitivity that resolves immediately is considered a reversible, self-limited pulp response to external stimulus (e.g., cold, caries).   - Radiographically no evidence of periapical pathology. - **Recommended Treatment:**   - Conservative caries removal (selective or total based on depth/location) and pulp-preserving restoration using adequate materials (e.g., adhesive composite).   - Monitor for resolution of symptoms[4](https://onlinelibrary.wiley.com/doi/pdf/10.1111/iej.13688)[5](https://www.nature.com/articles/s41415-025-8452-6)[6](https://link.springer.com/article/10.1007/s40368-025-01024-7).   **Indian Endodontic Society (IES)**   - **Diagnosis:** **Reversible Pulpitis**   - Mild inflammation; pulp capable of returning to health after removal of irritant. - **Recommended Treatment:**   - Remove etiologic factor (i.e., caries), restore tooth.   - Use calcium silicate liner for deeper lesions to support pulp healing, but not required for shallow to moderate caries.   - Emphasis on preserving pulp vitality—endodontic intervention not justified unless symptoms worsen[7](https://ies.org.in/images/pdf/vital-pulp-therapy-ies-position-statement.pdf).   **Supporting Evidence & Scholarly Consensus**   - **Symptoms of short, sharp pain with immediate resolution to cold, alongside a vital pulp and healthy periodontium, nearly always indicate reversible pulpitis due to caries or exposed dentin**[1](https://www.aae.org/specialty/wp-content/uploads/sites/2/2017/07/endodonticdiagnosisfall2013.pdf)[2](https://pmc.ncbi.nlm.nih.gov/articles/PMC9826047/)[5](https://www.nature.com/articles/s41415-025-8452-6). - Modern review papers and consensus reinforce avoiding unnecessary root canal therapy for such teeth; the preferred approach is **conservative management and vital pulp preservation**. Monitoring is important, but prognosis for recovery with this strategy is excellent[4](https://onlinelibrary.wiley.com/doi/pdf/10.1111/iej.13688)[8](https://pmc.ncbi.nlm.nih.gov/articles/PMC9831703/)[9](https://pmc.ncbi.nlm.nih.gov/articles/PMC8406990/).   **Definitive Treatment Plan (Synthesized Recommendation)**  **1. Caries and Restoration Management**   - Remove the small carious lesion while preserving healthy tooth structure. - If cavity is shallow/moderate and pulp is not exposed, proceed with **direct restoration** (composite preferred). - If close to pulp, consider a **bioactive liner** (calcium silicate cement) as a base for additional pulp protection.   **2. Vital Pulp Preservation**   - Do NOT perform endodontic (root canal) therapy unless new symptoms arise (lingering pain, spontaneous pain, or radiographic changes). - If accidental pulp exposure occurs and is pinpoint, direct pulp capping with calcium silicate cement (e.g., MTA/Biodentine) may be considered, provided hemostasis is easily achieved.   **3. Sensitivity Management**   - Transient sensitivity should resolve with caries removal and a well-sealed restoration. - For persistent post-operative sensitivity, at-home desensitizing toothpastes (potassium nitrate, fluoride) can be considered as an adjunct but are rarely needed after proper restoration[10](https://bmcoralhealth.biomedcentral.com/articles/10.1186/s12903-020-01199-z)[11](https://pmc.ncbi.nlm.nih.gov/articles/PMC3927677/).   **4. Follow-up Protocol**   - Re-examine at 4–8 weeks to confirm sensitivity has resolved. - Take a follow-up radiograph at 6–12 months if symptoms recur/continue. - Instruct the patient to return promptly if she experiences increased, spontaneous, or lingering pain.   **5. Patient Counseling**   - Explain the condition is mild and fully reversible. - Prognosis is excellent (near 100% success) if carious tissue is removed and a good restoration is placed. - Stress the importance of oral hygiene and regular dental check-ups to prevent recurrence.   **Key Points**   - **All international recommendations agree:** Diagnosis is **reversible pulpitis** with normal periapical tissues. - **Definitive treatment is caries removal and conservative restoration.** - **No endodontic therapy indicated** unless symptoms worsen or become irreversible. - Prognosis following conservative management and restoration is close to 100% if pulp is vital and the restoration is well-sealed. | **Comparative Diagnosis: Guideline-Based Classifications**  **Case Recap**   - **Patient**: 30-year-old female - **Chief Complaint**: Sharp, fleeting pain to cold in upper right canine (#6) - **Symptoms**: No spontaneous/lingering pain, no pain on biting, healthy periodontium - **Findings**: Small carious lesion in dentin, intact prior restoration, normal cold/electric response (quick), no apical/periradicular pathology   **AAE (American Association of Endodontists)**   - **Pulpal Diagnosis**: **Reversible Pulpitis**   - Triggered, sharp pain to cold stimulus that **resolves immediately** is the classic sign[1](https://www.aae.org/specialty/wp-content/uploads/sites/2/2017/07/endodonticdiagnosisfall2013.pdf)[2](https://mtnviewendo.com/aae-dx-terminology/).   - No spontaneous/lingering pain.   - Etiology: shallow caries, no pulp exposure. - **Periapical Diagnosis**: **Normal apical tissues**   - No percussion tenderness or periapical radiographic changes[1](https://www.aae.org/specialty/wp-content/uploads/sites/2/2017/07/endodonticdiagnosisfall2013.pdf). - **Treatment Protocol**: Remove the source of irritation (caries), restore the tooth atraumatically, monitor for symptom resolution. If the pulp is exposed during caries removal and hemostasis cannot be achieved, reconsider diagnosis[1](https://www.aae.org/specialty/wp-content/uploads/sites/2/2017/07/endodonticdiagnosisfall2013.pdf)[2](https://mtnviewendo.com/aae-dx-terminology/).   **ESE (European Society of Endodontology)**   - **Diagnosis**: **Reversible Pulpitis**   - Consistent with brief, sharp, stimulus-induced pain and healthy periapical tissues[3](https://britishendodonticsociety.org.uk/_userfiles/pages/files/duncan_et_al2019international_endodontic_journal.pdf)[4](https://onlinelibrary.wiley.com/doi/10.1111/iej.13974). - **Management**:   - **Selective/stepwise caries removal** recommended, especially when lesion is not deep. Use of aseptic techniques and rubber dam isolation[3](https://britishendodonticsociety.org.uk/_userfiles/pages/files/duncan_et_al2019international_endodontic_journal.pdf)[5](https://pmc.ncbi.nlm.nih.gov/articles/PMC12165973/).   - Direct restoration with composite or glass ionomer cement is appropriate; bioactive liner optional for deeper lesions. - **No evidence or symptoms requiring vital pulp therapy** (such as pulpotomy or root canal).[3](https://britishendodonticsociety.org.uk/_userfiles/pages/files/duncan_et_al2019international_endodontic_journal.pdf)[6](https://www.e-s-e.eu/for-professionals/news/ese-bite-size-bulletin-7537/)   **IES (Indian Endodontic Society)/Other Contemporary Consensus**   - **Diagnosis**: **Reversible Pulpitis**   - Pain only with cold stimulus, which resolves quickly after removing stimulus[7](https://www.ida.org.in/Membership/Details/Dental-Emergencies)[8](https://www.sciencedirect.com/topics/pharmacology-toxicology-and-pharmaceutical-science/pulpitis). - **Management**: Conservative caries removal and restoration. Emphasis on pulp preservation and monitoring for progression[7](https://www.ida.org.in/Membership/Details/Dental-Emergencies).   **Comparative Table**   | **Guideline/Org** | **Pulpal Diagnosis** | **Periapical Diagnosis** | **Definitive Treatment** | | --- | --- | --- | --- | | AAE | Reversible pulpitis | Normal | Remove caries, restore, monitor[1](https://www.aae.org/specialty/wp-content/uploads/sites/2/2017/07/endodonticdiagnosisfall2013.pdf)[2](https://mtnviewendo.com/aae-dx-terminology/) | | ESE | Reversible pulpitis | Normal | Selective caries removal, restore, pulp preservation[3](https://britishendodonticsociety.org.uk/_userfiles/pages/files/duncan_et_al2019international_endodontic_journal.pdf)[5](https://pmc.ncbi.nlm.nih.gov/articles/PMC12165973/) | | IES & Other Sources | Reversible pulpitis | Normal | Conservative caries removal & restoration[7](https://www.ida.org.in/Membership/Details/Dental-Emergencies)[8](https://www.sciencedirect.com/topics/pharmacology-toxicology-and-pharmaceutical-science/pulpitis) |   **Definitive, Guideline-Aligned Treatment Plan**  **1. Atraumatic Caries Removal**   - Remove **all affected tissue** in the small mesial lesion using careful, minimally invasive technique. - A rubber dam and magnification are recommended for moisture control and precision[3](https://britishendodonticsociety.org.uk/_userfiles/pages/files/duncan_et_al2019international_endodontic_journal.pdf)[5](https://pmc.ncbi.nlm.nih.gov/articles/PMC12165973/).   **2. Restoration**   - Place a well-adapted **composite resin** or glass ionomer restoration. - If caries is not deep or pulp is not threatened, no base/liner needed. - **If deeper dentin is exposed**, consider a **bioactive liner** (e.g., calcium silicate-based cement) under restoration for added pulp protection[3](https://britishendodonticsociety.org.uk/_userfiles/pages/files/duncan_et_al2019international_endodontic_journal.pdf).   **3. Vital Pulp Protection**   - **If no pulp exposure** occurs and hemostasis is not a concern: proceed with direct restoration. - If, inadvertently, a **small pulp exposure** occurs and there’s **no persistent bleeding**, direct pulp capping with a biocompatible material (e.g., MTA, Biodentine) is possible. However, this is rarely needed in the described case.   **4. Monitoring**   - Advise patient that cold sensitivity should resolve within days to a week post-restoration. - Schedule a follow-up at 6–12 months to reassess clinical and radiographic status, confirming vitality and absence of symptoms[1](https://www.aae.org/specialty/wp-content/uploads/sites/2/2017/07/endodonticdiagnosisfall2013.pdf)[4](https://onlinelibrary.wiley.com/doi/10.1111/iej.13974).   **5. Patient Counseling**   - Explain high likelihood (>95%) of complete symptom resolution after conservative treatment[3](https://britishendodonticsociety.org.uk/_userfiles/pages/files/duncan_et_al2019international_endodontic_journal.pdf)[9](https://www.msdmanuals.com/professional/dental-disorders/common-dental-disorders/pulpitis). - Instruct to return if pain becomes lingering, spontaneous, or if new symptoms (swelling, pain on biting) develop.   **6. No Endodontic (Root Canal) Treatment Indicated**   - All major guidelines and consensus statements agree: **root canal therapy is not necessary for reversible pulpitis** unless there is symptom progression and/or new pathologic findings on review[1](https://www.aae.org/specialty/wp-content/uploads/sites/2/2017/07/endodonticdiagnosisfall2013.pdf)[3](https://britishendodonticsociety.org.uk/_userfiles/pages/files/duncan_et_al2019international_endodontic_journal.pdf)[9](https://www.msdmanuals.com/professional/dental-disorders/common-dental-disorders/pulpitis).   **Key Evidence-Based Points**   - **Diagnosis is reversible pulpitis:** sharp, brief, cold-induced pain with rapid recovery, vital pulp, healthy periodontium, no radiographic pathology. - **Caries removal and restoration is nearly always sufficient.** Bioactive liner is optional if caries approaches inner dentin but is still short of pulp[3](https://britishendodonticsociety.org.uk/_userfiles/pages/files/duncan_et_al2019international_endodontic_journal.pdf)[5](https://pmc.ncbi.nlm.nih.gov/articles/PMC12165973/). - **Pulp vitality and tooth integrity are preserved with conservative, evidence-based management.** - **Endodontic intervention is overtreatment in these cases unless pulpal symptoms or pathology progresses.**   **In summary:** This case illustrates classic reversible pulpitis associated with minimal caries and responsive, vital pulp. All major guidelines (AAE, ESE, IES) recommend prompt, conservative caries removal and restoration, with close follow-up but no need for root canal therapy—aligning evidence-based pulp preservation with optimal patient outcomes |
| 4 | **Comparative Diagnosis According to Major Guidelines**  **Case Recap**   - **Patient**: 55-year-old male - **Chief complaint**: Sharp, localized pain on biting with lower left central incisor (#31) - **Findings**:   - Deep carious lesion near large failing restoration.   - No response to cold or EPT (pulp necrosis).   - Tender to percussion & pain on biting.   - Radiograph: deep caries close to pulp chamber, loss of lamina dura, slight periapical radiolucency.   - No significant sensitivity to hot/cold; no swelling or mobility; healthy periodontium.   **AAE (American Association of Endodontists) Classification**   - **Pulpal Diagnosis**: **Pulp Necrosis**   - Clinical and radiographic signs: no response to sensibility testing, deep carious lesion, non-vital pulp[1](https://www.perplexity.ai/search/aaeconsensusconferencerecommendeddiagnosticterminology.pdf). - **Periapical Diagnosis**: **Symptomatic Apical Periodontitis**   - Pain to percussion and biting, radiographic evidence of periapical radiolucency and loss of lamina dura[1](https://www.perplexity.ai/search/aaeconsensusconferencerecommendeddiagnosticterminology.pdf)[3](https://decisionsindentistry.com/article/universal-classification-endodontic-diagnosis/). - **Treatment Indication**: Non-surgical root canal treatment is required for pulp necrosis with symptomatic apical periodontitis.   **ESE (European Society of Endodontology - S3 Clinical Guidelines)**   - **Pulpal Status**: **Necrotic (Non-vital) Pulp**   - No response to cold and EPT, history and testing confirm non-vital pulp tissue[4](https://www.perplexity.ai/search/Int-Endodontic-J-2023-Duncan-Treatment-of-pulpal-and-apical-disease-The-European-Society-of-Endo.pdf). - **Apical Status**: **Symptomatic Apical Periodontitis**   - Pain on biting/percussion, periapical radiolucency and lamina dura breakdown on radiograph[4](https://www.perplexity.ai/search/Int-Endodontic-J-2023-Duncan-Treatment-of-pulpal-and-apical-disease-The-European-Society-of-Endo.pdf). - **Guideline-Based Recommendations**:   - Non-surgical root canal treatment is the standard.   - Aseptic technique mandatory (rubber dam, magnification)[4](https://www.perplexity.ai/search/Int-Endodontic-J-2023-Duncan-Treatment-of-pulpal-and-apical-disease-The-European-Society-of-Endo.pdf).   - Use contemporary chemomechanical preparation, sodium hypochlorite irrigation, calcium silicate-based root filling.   **Indian Endodontic Society and Contemporary Evidence**   - **Diagnosis**: **Pulp Necrosis with Symptomatic Apical Periodontitis**   - Deep caries, non-response to vitality tests, pain on pressure, radiographic periapical change[5](https://www.ncbi.nlm.nih.gov/books/NBK589656/). - **Treatment Position**:   - Root canal therapy (pulpectomy) recommended for non-vital teeth with apical pathology.   - Conservative approaches like vital pulp therapy not effective/indicated for necrotic pulps or apical lesions[5](https://pmc.ncbi.nlm.nih.gov/articles/PMC10507313/)[6](https://www.frontiersin.org/journals/dental-medicine/articles/10.3389/fdmed.2022.1048137/full).   **Comparison Table**   | **Guideline/Source** | **Pulpal Diagnosis** | **Periapical Diagnosis** | **Main Treatment Recommendation** | | --- | --- | --- | --- | | AAE | Pulp necrosis | Symp. apical periodontitis | Non-surgical root canal therapy | | ESE S3 Guidelines | Non-vital (necrotic) pulp | Symp. apical periodontitis | Non-surgical root canal therapy, asepsis | | IES/Contemporary Evidence | Pulp necrosis | Symp. apical periodontitis | Non-surgical root canal therapy only |   **Definitive, Evidence-based Treatment Plan**  **1. Diagnosis Confirmation**   - Confirm pulp necrosis (repeat sensibility tests and compare contralateral/adjacent teeth)[2](https://www.perplexity.ai/search/aaeconsensusconferencerecommendeddiagnosticterminology.pdf). - Confirm symptomatic apical periodontitis (tenderness, pain to pressure, radiographic findings)[1](https://www.perplexity.ai/search/Int-Endodontic-J-2023-Duncan-Treatment-of-pulpal-and-apical-disease-The-European-Society-of-Endo.pdf).   **2. Definitive Management**   - **Non-surgical Root Canal Treatment**:   1. **Aseptic technique:** Rubber dam, tooth disinfection, magnification[4](https://www.perplexity.ai/search/Int-Endodontic-J-2023-Duncan-Treatment-of-pulpal-and-apical-disease-The-European-Society-of-Endo.pdf).   2. **Access and Cleaning:** Remove all caries and failing restorative material.   3. **Chemomechanical Preparation:** Use sodium hypochlorite (NaOCl) irrigation, modern rotary/hand files.   4. **Working length confirmation:** Apex locator + confirmatory radiograph.   5. **Intracanal Medicament:** Calcium hydroxide if infection control is needed between visits.   6. **Obturation:** Use calcium silicate-based sealer for obturation with gutta-percha[4](https://www.perplexity.ai/search/Int-Endodontic-J-2023-Duncan-Treatment-of-pulpal-and-apical-disease-The-European-Society-of-Endo.pdf).   7. **Final Restoration:** Immediate, well-sealed coronal restoration (composite preferred; full-coverage if extensive loss)[1](https://www.perplexity.ai/search/endodonticdiagnosisfall2013.pdf).   **3. Adjunct Measures**   - **Pain Management:** NSAIDs for post-op discomfort. - **Antibiotics:** Only if there are systemic signs (fever, malaise, cellulitis), not routinely recommended[4](https://www.perplexity.ai/search/Int-Endodontic-J-2023-Duncan-Treatment-of-pulpal-and-apical-disease-The-European-Society-of-Endo.pdf).   **4. Follow-up Protocol**   - **6–12 months:** Clinical and radiographic review for resolution of pain/tenderness and evidence of periapical healing. - **Annually (up to 4 years):** Ensure no new or persistent periapical lesion[4](https://www.perplexity.ai/search/endodonticdiagnosisfall2013.pdf).   **5. Prognosis and Counseling**   - Success rates of non-surgical RCT for necrotic teeth with apical periodontitis: 85–95% with modern techniques and follow-up. - Advise on importance of timely, high-quality definitive restoration to prevent leakage and reinfection. - Provide guidance regarding signs of complications (swelling, recurrent pain) and necessity to return for reassessment.   **Key Points from All Guidelines**   - **Vital pulp therapy or conservative approaches are NOT indicated**—the tooth is non-vital and has periapical disease. - **Root canal therapy is the only definitive treatment** for a restorable tooth with necrosis and apical periodontitis. - **Tooth extraction** is only considered if the tooth is not restorable or if the patient declines RCT. - **Aseptic technique and high-quality obturation/sealing** are critical for treatment success[4](https://www.perplexity.ai/search/endodonticdiagnosisfall2013.pdf)[3](https://www.ncbi.nlm.nih.gov/books/NBK589656/). - **Follow-up is mandatory** to confirm resolution and long-term healing.   **In summary:** There is universal agreement among the AAE, ESE S3-level clinical guidelines, and contemporary international and Indian recommendations: the diagnosis is pulp necrosis with symptomatic apical periodontitis, and the only indicated treatment is non-surgical root canal therapy with modern aseptic and obturation protocols. Prognosis is favorable if guidelines are followed and restoration is prompt and well-sealed[1](https://www.perplexity.ai/search/Int-Endodontic-J-2023-Duncan-Treatment-of-pulpal-and-apical-disease-The-European-Society-of-Endo.pdf)[3](https://www.ncbi.nlm.nih.gov/books/NBK589656/). | **Comparative Diagnosis According to Major Guidelines**  **Case Recap**   - **Patient**: 55-year-old male - **Chief Complaint**: Sharp, localized pain upon biting on lower left central incisor (#31), lingering discomfort after biting, no spontaneous pain, no significant thermal sensitivity. - **Clinical Findings**: Deep carious lesion near a large, compromised restoration; percussion and bite tenderness; no visible cracks; healthy surrounding gingiva. - **Vitality Tests**: No response to cold or EPT, indicating pulp necrosis. - **Radiographs**: Deep caries near pulp, loss of lamina dura, slight periapical radiolucency, restoration breakdown, no root resorption.   **Diagnostic Classifications Compared**  **AAE (American Association of Endodontists)**   - **Pulpal Diagnosis**: **Pulp Necrosis**   - Defined as a nonresponsive tooth to both cold and electric pulp testing[1](https://www.aae.org/specialty/wp-content/uploads/sites/2/2017/07/endodonticdiagnosisfall2013.pdf)[2](https://www.aae.org/specialty/wp-content/uploads/sites/2/2017/07/aaeconsensusconferencerecommendeddiagnosticterminology.pdf)[3](https://pmc.ncbi.nlm.nih.gov/articles/PMC9826047/)[4](https://decisionsindentistry.com/article/universal-classification-endodontic-diagnosis/)[5](https://mtnviewendo.com/aae-dx-terminology/).   - Etiology: Advanced caries, large restoration breakdown. - **Periapical Diagnosis**: **Symptomatic Apical Periodontitis**   - Tenderness to percussion/bite with radiographic evidence of periapical changes (loss of lamina dura, slight radiolucency)[1](https://www.aae.org/specialty/wp-content/uploads/sites/2/2017/07/endodonticdiagnosisfall2013.pdf)[6](https://pmc.ncbi.nlm.nih.gov/articles/PMC11287039/)[4](https://decisionsindentistry.com/article/universal-classification-endodontic-diagnosis/)[7](https://exodontia.info/wp-content/uploads/2021/07/Endo_Topics_2004._Classification_Diagnosis_Clinical_Manifestations_of_Apical_Periodontitis.pdf). - **Rationale**: Both findings necessitate endodontic (root canal) intervention.   **ESE (European Society of Endodontology S3-Level Guidelines)**   - **Diagnosis**: **Necrotic Pulp with Early Apical Periodontitis**   - Supported by absent vitality, deep caries near pulp, and radiographic periapical changes[8](https://pmc.ncbi.nlm.nih.gov/articles/PMC11991915/)[9](https://pubmed.ncbi.nlm.nih.gov/37772327/)[10](https://www.e-s-e.eu/for-professionals/resources-for-clinicians/)[11](https://onlinelibrary.wiley.com/doi/10.1111/iej.13974).   - ESE emphasizes mandatory periapical radiography, confirmation of necrosis via vitality tests, and clinical-radiographic integration to guide treatment[8](https://pmc.ncbi.nlm.nih.gov/articles/PMC11991915/)[11](https://onlinelibrary.wiley.com/doi/10.1111/iej.13974). - **Guideline Rec**: Full root canal therapy in cases of necrosis and apical periodontitis, with proper aseptic and radiographic protocols.   **Contemporary Evidence & Indian Endodontic Society (IES)**   - **Diagnosis**: **Pulp Necrosis with Apical Periodontitis**   - Nonresponsive tooth with periapical tenderness and radiographic changes is universally categorized as "necrotic pulp with symptomatic apical periodontitis"[6](https://pmc.ncbi.nlm.nih.gov/articles/PMC11287039/)[12](https://www.frontiersin.org/journals/dental-medicine/articles/10.3389/fdmed.2022.1048137/full)[13](https://www.aapd.org/media/Policies_Guidelines/BP_PulpTherapy.pdf)[14](https://britishendodonticsociety.org.uk/_userfiles/pages/files/bjrndal_et_al2019international_endodontic_journal_1.pdf). - **Guideline Rec**: Conventional root canal treatment (pulpectomy) is indicated. Stepwise, vital pulp therapy, or conservative caries removal is NOT suitable for established necrosis[13](https://www.aapd.org/media/Policies_Guidelines/BP_PulpTherapy.pdf)[14](https://britishendodonticsociety.org.uk/_userfiles/pages/files/bjrndal_et_al2019international_endodontic_journal_1.pdf). - **Note**: Regenerative procedures (REPs) are being discussed for mature teeth, but traditional RCT remains the standard[15](https://pmc.ncbi.nlm.nih.gov/articles/PMC11685513/).   **Comparative Summary Table**   | **Guideline/Org** | **Pulpal Diagnosis** | **Periapical Status** | **Treatment Recommendation** | | --- | --- | --- | --- | | AAE (US) | Pulp necrosis | Symptomatic apical periodontitis | Root canal therapy (RCT) | | ESE (Europe) | Pulp necrosis | Early apical periodontitis | RCT, mandatory periapical imaging | | IES/Contemp Evidence | Pulp necrosis | Apical periodontitis | RCT, no vital pulp therapy indicated |   **Definitive Treatment Plan (Consensus-Based)**  **1. Pre-Operative Steps**   - Full case assessment, including additional radiographs if multi-rooted or unclear anatomy. - Explain to the patient that the nerve is nonviable, infection is present, and RCT is required to avoid progression. - Discuss prognosis: high success rate if proper protocols followed.   **2. Root Canal Therapy Protocol**   - **Local anesthesia** and rubber dam isolation for infection control. - **Access cavity**: Remove the existing restoration and carious tissue to visualize and access the pulp chamber. - **Working length determination**: Use apex locator and radiographs. - **Canal preparation**:   - Thorough chemo-mechanical debridement (rotary/hand instruments).   - Copious irrigation with sodium hypochlorite (2.5–5.25%) and EDTA to disinfect. - **Interim medication** (if two visits warranted): Intracanal calcium hydroxide to control infection. - **Obturation**: Gutta-percha with a bioceramic or calcium silicate-based sealer. - **Definitive restoration**: After obturation, restore with high-quality composite or post/core and crown if significant structure is missing.   **3. Follow-up and Monitoring**   - Post-op radiograph to confirm obturation quality. - Clinical/radiographic follow-up at 6 and 12 months to monitor healing. - Continuous review if new symptoms (pain, swelling, sinus tract) or if apical radiolucency persists or worsens.   **4. Patient Counseling**   - Explain the reason for root canal and the expected outcome. - Emphasize the importance of timely definitive restoration to prevent future reinfection or fracture. - Advise prompt return if swelling, pain, or sinus tract develops.   **5. Alternative Approaches**   - If tooth is not restorable (e.g., vertical fracture found during treatment), consider extraction and replacement options. - Emerging evidence supports regenerative endodontics (REP) for mature teeth, but these are not yet the primary standard for cases like this[15](https://pmc.ncbi.nlm.nih.gov/articles/PMC11685513/).   **Key Clinical Points & Prognosis**   - Nonresponsive pulp, radiographic apical changes, and bite pain = **Necrotic pulp with symptomatic apical periodontitis**: requires root canal, NOT vital pulp therapy. - Prognosis of RCT in such cases is typically **excellent (>90% success)**[1](https://www.aae.org/specialty/wp-content/uploads/sites/2/2017/07/endodonticdiagnosisfall2013.pdf)[6](https://pmc.ncbi.nlm.nih.gov/articles/PMC11287039/)[4](https://decisionsindentistry.com/article/universal-classification-endodontic-diagnosis/)[13](https://www.aapd.org/media/Policies_Guidelines/BP_PulpTherapy.pdf)[16](https://my.clevelandclinic.org/health/diseases/23573-pulp-necrosis). - Preservation of tooth structure and optimal restoration are critical for long-term survival.   **In summary:** All current major guidelines (AAE, ESE, IES) agree that the diagnosis is pulp necrosis with symptomatic apical periodontitis, best managed by conventional root canal therapy with appropriate infection control and follow-up. Conservative treatments aimed at pulp preservation are not suitable when pulp necrosis and apical pathology are established. | **Comparative Diagnosis According to Major Guidelines and Recommendations**  **Case Summary**   - **Patient**: 55-year-old male, lower left central incisor (#31) - **Symptoms**: Sharp, localized pain upon biting/pressure; lingering discomfort after biting; no hot/cold sensitivity; no spontaneous pain - **Clinical findings**: Deep carious lesion, large restoration with breakdown, no mobility, healthy periodontium, no visible cracks - **Tests**: Cold/EPT: no response (necrotic pulp); percussion/bite: tender - **Radiograph**: Deep caries, loss of lamina dura, slight periapical radiolucency, restoration breakdown   **Diagnostic Classification Comparison**  **AAE (American Association of Endodontists)**   - **Pulpal Diagnosis**: **Pulp Necrosis**   - Complete lack of response to cold and EPT in a previously untreated tooth is diagnostic for necrosis[1](https://www.aae.org/specialty/wp-content/uploads/sites/2/2017/07/endodonticdiagnosisfall2013.pdf)[2](https://www.aae.org/specialty/wp-content/uploads/sites/2/2017/07/aaeconsensusconferencerecommendeddiagnosticterminology.pdf)[3](https://www.slideshare.net/slideshow/american-association-of-endodontics-guidelines-on-pulpal-diagnosis-pptx/279449203).   - No spontaneous pain, but necrosis suspected due to deep caries and non-vital tests. - **Periapical Diagnosis**: **Symptomatic Apical Periodontitis**   - Tenderness to percussion/bite and radiographic periapical radiolucency support diagnosis[4](https://pmc.ncbi.nlm.nih.gov/articles/PMC9826047/)[5](https://www.aae.org/specialty/a-concise-guide-to-pathology-within-endodontics/)[6](https://www.tv-endo.com/root-canals/aae-dx-terminology). - **Comments**: Sharp pressure pain and necrotic, non-vital pulp are classic for this diagnosis.   **ESE (European Society of Endodontology) S3-Level Guidelines**   - **Diagnosis**: **Pulp Necrosis with Apical Periodontitis**   - Cold/EPT testing (no response) plus clinical and radiographic findings are diagnostic for necrosis[7](https://pmc.ncbi.nlm.nih.gov/articles/PMC11991915/)[8](https://pubmed.ncbi.nlm.nih.gov/37772327/)[9](https://onlinelibrary.wiley.com/doi/abs/10.1111/iej.13974)[10](https://www.e-s-e.eu/for-professionals/resources-for-clinicians/).   - Periapical radiolucency and loss of lamina dura signal apical periodontitis. - **Diagnostic process**: Standardized evidence-based protocols recommend combining clinical, radiographic, and vitality tests for a defensible diagnosis.   **Indian Endodontic Society (IES)**   - **Diagnosis**: **Pulp Necrosis and Apical Periodontitis**   - Negative pulp tests, pain on pressure, periapical radiolucency, and caries near the pulp support this classification[11](https://ies.org.in/images/pdf/vital-pulp-therapy-ies-position-statement.pdf).   - Emphasis on using a combination of pulp tests (cold/EPT), radiographs, and clinical pain history for diagnosis.  | **Guideline** | **Pulpal Diagnosis** | **Periapical Diagnosis** | **Key Diagnostic Features** | | --- | --- | --- | --- | | AAE | Pulp necrosis | Symptomatic apical periodontitis | Negative pulp tests, pain on biting, radiolucency | | ESE | Pulp necrosis | Apical periodontitis | No pulp response, apical changes | | IES | Pulp necrosis | Apical periodontitis | Negative tests, periapical changes, caries |   **Comparative Evidence-Based Treatment Recommendations**  **AAE Recommendations**   - **Definitive Treatment**: **Non-surgical root canal treatment (RCT)**   - Standard of care for mature teeth with necrotic pulp and apical periodontitis[12](https://www.aae.org/specialty/wp-content/uploads/sites/2/2018/04/TreatmentStandards_Whitepaper.pdf)[13](https://my.clevelandclinic.org/health/diseases/23573-pulp-necrosis).   - Procedure: Complete chemomechanical debridement, disinfection (NaOCl irrigation and/or calcium hydroxide between visits if draining or persistent symptoms), obturation with gutta-percha/sealer, prompt permanent restoration. - **Alternative**: Extraction (if the tooth is non-restorable or patient preference)   **ESE S3-Level Guidelines**   - **Primary Recommendation**: **Non-surgical root canal treatment**   - Rubber dam and aseptic technique mandatory.   - Disinfection of root canal using sodium hypochlorite + EDTA, instrumentation, well-adapted obturation, immediate well-sealed restoration. - **Follow-up**: Clinical/radiographic re-evaluation at 6-12 months; success defined by absence of symptoms and resolution of radiolucency.   **IES (Indian Endodontic Society)**   - **Definitive Therapy**: **Pulpectomy/Non-surgical root canal treatment**   - Same procedure/standards as above: careful working length determination, copious irrigation, bioactive sealer if possible.   - Use CBCT/radiographs for uncertain cases.   - Alternatives: Surgical endodontics (if conventional fails), extraction for non-restorable teeth.   **Synthesized, Evidence-Based Definitive Treatment Plan**  **1. Pre-Operative Assessment**   - Reconfirm diagnosis with repeated pulp testing and updated radiographs if needed. - Assess for possible restorability and crack/fracture using magnification and transillumination.   **2. Non-Surgical Root Canal Treatment**   - **Aseptic technique**: Rubber dam isolation and disinfection of operative field. - **Access and canal negotiation**: Verify all canals are accessible, especially in mandibular incisors. - **Working length**: Electronic apex locator + confirmatory radiograph. - **Debridement/disinfection**:   - Instrument to working length with rotary or hand files   - Irrigate with sodium hypochlorite (2.5–5.25%) and EDTA; final flush with NaOCl.   - If purulence/exudate: Place calcium hydroxide paste as interim medicament, temporize, and recall in 1-2 weeks. - **Obturation**:   - Dry canal, obturate with gutta-percha and bioceramic sealer or equivalent.   - Confirm absence of symptoms post-op. - **Restoration**:   - Place well-sealed direct composite restoration promptly, or crown if significant coronal loss. - **Post-op instructions**: Analgesics as needed; explain expectation for resolution of biting pain and potential for minor post-op tenderness.   **3. Follow-up Protocol**   - Clinical and radiographic review at 6 and 12 months post-operatively   - Expect reduction or resolution of periapical radiolucency and absence of symptoms.   **4. Alternative Treatments**   - **Extraction**: Only if tooth unrestorable, or if RCT contraindicated. - **Regenerative approaches**: Mostly reserved for immature teeth, but limited evidence exists for specific mature cases[14](https://pmc.ncbi.nlm.nih.gov/articles/PMC11685513/). - **Apical surgery**: Reserved for persistent periapical pathology after failed conventional RCT.   **5. Patient Counseling**   - Explain necessity and rationale for RCT: removal of necrotic pulp and bacteria to treat infection, relieve pain, and prevent spread. - Emphasize importance of high-quality restoration and regular follow-up. - Prognosis for properly executed RCT is excellent (>90% success in similar cases).   **Key Evidence-Based Points**   - **Diagnosis** is definitive: necrotic pulp with symptomatic apical periodontitis, based on negative vitality tests, radiolucency, and pain on biting. - **All major guidelines** (AAE, ESE, IES) agree on **non-surgical root canal treatment as the definitive intervention**[1](https://www.aae.org/specialty/wp-content/uploads/sites/2/2017/07/endodonticdiagnosisfall2013.pdf)[2](https://www.aae.org/specialty/wp-content/uploads/sites/2/2017/07/aaeconsensusconferencerecommendeddiagnosticterminology.pdf)[12](https://www.aae.org/specialty/wp-content/uploads/sites/2/2018/04/TreatmentStandards_Whitepaper.pdf)[7](https://pmc.ncbi.nlm.nih.gov/articles/PMC11991915/)[11](https://ies.org.in/images/pdf/vital-pulp-therapy-ies-position-statement.pdf)[8](https://pubmed.ncbi.nlm.nih.gov/37772327/)[9](https://onlinelibrary.wiley.com/doi/abs/10.1111/iej.13974)[6](https://www.tv-endo.com/root-canals/aae-dx-terminology)[13](https://my.clevelandclinic.org/health/diseases/23573-pulp-necrosis). - **Prompt, well-sealed permanent restoration** is critical for success. - **Follow-up** ensures complete healing and identification of any complications.   **In summary:** This is a classic scenario of pulp necrosis with symptomatic apical periodontitis in a mature tooth, for which all authoritative global guidelines recommend conventional root canal treatment. Restorative and periodic follow-up complete the cycle of evidence-based care. Extraction is reserved for non-restorable or failed cases, with surgical approaches as possible adjuncts in rare instances. |
| 5 | **Comparative Diagnosis: Guidelines and Recommendations**  **Case Recap**   - **Patient**: 20-year-old female - **Chief complaint**: Sharp, transient pain to cold in upper left lateral incisor (#10) - **Symptoms**: No spontaneous pain, no lingering pain, no pain on biting; discomfort subsides immediately after stimulus is removed - **Exam**: Small carious lesion near restoration, no periapical or PDL pathology, normal percussion and palpation, healthy periodontium - **Radiograph**: Lesion confined to the enamel/dentin junction, not near pulp, no periapical pathology.   **Comparative Diagnostic Classifications**  **American Association of Endodontists (AAE)**   - **Diagnosis:** **Reversible pulpitis**   - Definition: Sharp, brief pain only to stimulus (cold), subsides immediately, no spontaneous or lingering pain, and no radiographic evidence of apical disease[1](https://www.aae.org/specialty/wp-content/uploads/sites/2/2017/07/endodonticdiagnosisfall2013.pdf)[2](https://www.aae.org/wp-content/uploads/2021/05/VitalPulpTherapyPositionStatement_v2.pdf).   - Etiology: Shallow caries, no pulp exposure.   - **Periapical status:** Normal.   **European Society of Endodontology (ESE)**   - **Diagnosis:** **Reversible pulpitis**   - Criteria: Pain short-lived on stimulus, no lingering discomfort, caries not deep, clinical and radiographic signs show healthy periapical tissues.   - **Guideline:** Selective (minimally invasive) caries removal in one step for lesions with a dentin layer remaining3[4](https://endodontiforeningen.dk/wp/wp-content/uploads/ESE_Deep_Caries.pdf)[5](https://pmc.ncbi.nlm.nih.gov/articles/PMC9306596/).   - **Periapical status:** Normal[6](https://onlinelibrary.wiley.com/doi/10.1111/iej.13974)[7](https://onlinelibrary.wiley.com/doi/full/10.1111/iej.14067).   **Indian Endodontic Society (IES)**   - **Diagnosis:** **Mild symptomatic (reversible) pulpitis**   - Criteria: Pain on stimulus only, short duration, caries not very deep, positive cold/EPT, normal periodontium8[9](https://ies.org.in/images/pdf/vital-pulp-therapy-ies-position-statement.pdf).   - **Guideline:** Conservative caries removal, restoration; monitor for symptom resolution.   **Summary Table**   | **Organization** | **Diagnosis** | **Periapical Status** | **Recommended Protocol** | | --- | --- | --- | --- | | AAE | Reversible pulpitis | Normal | Remove caries, well-sealed restoration, monitor, no endodontic therapy | | ESE | Reversible pulpitis | Normal | Selective caries removal, restore, avoid pulp exposure, monitor | | IES | Reversible pulpitis | Normal | Conservative caries removal, restoration, vital pulp preservation |   **Evidence-Based Definitive Treatment Plan**  **1. Conservative Caries Removal**   - Remove all caries conservatively, ideally with rubber dam isolation and magnification. - Aim to **preserve as much tooth structure as possible**; avoid pulp exposure.   **2. Restoration**   - Place a **well-adapted composite resin** restoration (or high-quality glass ionomer as needed). - If the lesion is shallow (not near pulp), a liner may not be required. - If deep dentin is encountered, a **bioactive liner** (calcium silicate cement like MTA or Biodentine) can be optionally placed for added pulp protection38[2](https://www.aae.org/wp-content/uploads/2021/05/VitalPulpTherapyPositionStatement_v2.pdf)[9](https://ies.org.in/images/pdf/vital-pulp-therapy-ies-position-statement.pdf).   **3. Vital Pulp Protection**   - **Direct and indirect pulp capping not indicated** unless pulp is accidentally or iatrogenically exposed and presents with healthy bleeding controllable within 5 minutes (rare in this case). - If exposure occurs during caries removal, follow modern vital pulp therapy guidelines using bioactive cements and strict asepsis.   **4. Monitoring and Follow-up**   - Advise the patient that sensitivity should resolve within days to a week post-restoration. - Follow-up at 6–12 months to confirm absence of symptoms and continued pulp vitality (via cold/EPT)[1](https://www.aae.org/specialty/wp-content/uploads/sites/2/2017/07/endodonticdiagnosisfall2013.pdf)8. - Repeat radiographs only if symptoms persist.   **5. Patient Counseling**   - Explain that this is a classic case of reversible pulpitis and the tooth will almost certainly return to normal once the cause (caries) is removed and restored. - Educate on signs of progression (spontaneous/lingering pain, swelling) and importance of follow-up if symptoms worsen.   **6. No Endodontic (RCT) Indicated**   - **Root canal treatment is not warranted** unless symptoms progress, the pulpal condition deteriorates, or there is evidence of irreversible inflammation or necrosis[1](https://www.aae.org/specialty/wp-content/uploads/sites/2/2017/07/endodonticdiagnosisfall2013.pdf)[4](https://endodontiforeningen.dk/wp/wp-content/uploads/ESE_Deep_Caries.pdf)[5](https://pmc.ncbi.nlm.nih.gov/articles/PMC9306596/)[2](https://www.aae.org/wp-content/uploads/2021/05/VitalPulpTherapyPositionStatement_v2.pdf)[10](https://jcda.ca/article/d90)[9](https://ies.org.in/images/pdf/vital-pulp-therapy-ies-position-statement.pdf).   **Key Clinical/Evidence-based Points**   - **Reversible pulpitis** is diagnosed when there is **brief pain to stimulus** (cold, sweet) that **goes away right after the stimulus is removed**, without spontaneous pain, and with a normal periapex[1](https://www.aae.org/specialty/wp-content/uploads/sites/2/2017/07/endodonticdiagnosisfall2013.pdf)[11](https://www.medicalnewstoday.com/articles/pulpitis)[4](https://endodontiforeningen.dk/wp/wp-content/uploads/ESE_Deep_Caries.pdf)[12](https://pmc.ncbi.nlm.nih.gov/articles/PMC10507313/)[2](https://www.aae.org/wp-content/uploads/2021/05/VitalPulpTherapyPositionStatement_v2.pdf)[10](https://jcda.ca/article/d90)[13](https://pmc.ncbi.nlm.nih.gov/articles/PMC2837315/). - All current guidelines recommend **conservative tissue management**, preservation of vital pulp, and avoidance of overtreatment for cases like this. - The **prognosis is excellent** (well over 95% success) if care is timely, conservative, and follows guidelines for pulp preservation[2](https://www.aae.org/wp-content/uploads/2021/05/VitalPulpTherapyPositionStatement_v2.pdf)38[9](https://ies.org.in/images/pdf/vital-pulp-therapy-ies-position-statement.pdf). - Systematic follow-up maximizes long-term vitality, especially in young patients.   **In summary:** This case is diagnosed as reversible pulpitis according to all major endodontic organizations. The best practice is atraumatic, selective caries removal, high-quality restoration, and close monitoring—ensuring conservative, evidence-based care with an excellent prognosis and no need for root canal therapy unless symptoms evolve. | **Comparative Diagnosis by Guidelines and Classifications**  **Case Summary**   - **Patient**: 20-year-old female, upper left lateral incisor (#10) - **Chief complaint**: Sharp, brief pain to cold stimulus (subsides immediately) - **No**: Spontaneous pain, pain on biting, lingering sensitivity - **Clinical findings**: Small carious lesion (near disto-incisal edge), healthy pulp/periapex, no fractures - **Vitality tests**: Brief sharp response to cold, no percussion/palpation/bite pain, normal radiograph   **AAE (American Association of Endodontists)**   - **Pulpal Diagnosis**: **Reversible Pulpitis**   - Sharp, transient pain provoked by cold, which ceases immediately after removal of stimulus, is classic for reversible pulpitis.   - Cause: Small carious lesion not close to the pulp, no pulp exposure or radiographic pathology. - **Periapical Diagnosis**: **Normal Apical Tissues**   - No tenderness or radiographic changes. - **Key Reference**: "Diagnosis: reversible pulpitis; ... Treatment would be excavation of the caries followed by placement of a permanent restoration."[1](https://www.aae.org/specialty/wp-content/uploads/sites/2/2017/07/endodonticdiagnosisfall2013.pdf)[2](https://pmc.ncbi.nlm.nih.gov/articles/PMC9826047/)   **ESE (European Society of Endodontology)**   - **Diagnosis**: **Reversible Pulpitis**   - Clinical and radiographic indications (localized mild inflammation, brief cold pain, no lingering/biting symptoms).   - Management: Selective caries removal and prompt, well-sealed restoration. - **Criteria**: "Discomfort is experienced when a stimulus such as cold is applied and goes away within a couple of seconds following the removal ..."[3](https://onlinelibrary.wiley.com/doi/10.1111/iej.13974)[4](https://link.springer.com/article/10.1007/s40368-025-01024-7)   **Indian Endodontic Society (IES) / Contemporary Consensus**   - **Diagnosis**: **Reversible Pulpitis**   - Cold sensitivity resolves rapidly, no spontaneous/lingering pain.   - Conservative caries removal and restoration are recommended.[5](https://pmc.ncbi.nlm.nih.gov/articles/PMC10507313/)[6](https://www.sakraworldhospital.com/blogs/pulpitis-symptoms-causes-diagnosis-and-treatment/191)   **Evidence from Literature and Consensus**   - Brief cold sensitivity (≤ a few seconds) strongly associated with reversible pulpitis, not irreversible disease[7](https://pmc.ncbi.nlm.nih.gov/articles/PMC7769305/)[8](https://onlinelibrary.wiley.com/doi/10.1111/iej.12793). - No need for endodontic therapy unless pain progresses or persists after definitive management[9](https://pmc.ncbi.nlm.nih.gov/articles/PMC9321233/)[10](https://www.msdmanuals.com/professional/dental-disorders/common-dental-disorders/pulpitis)[11](https://my.clevelandclinic.org/health/diseases/23536-pulpitis).   **Treatment Plan (Synthesis of Guidelines)**  **1. Caries Removal**   - Conservative caries excavation under good isolation (ideally rubber dam). - If lesion is shallow/moderate: Remove caries and assess for any pulp exposure (not expected here).   **2. Restoration**   - Direct composite or glass ionomer restoration; ensure tight seal. - If base/liner needed (deeper lesions): Consider bioactive/calcium silicate liner, but not strictly required if cavity is shallow.   **3. Vital Pulp Assessment**   - If close to pulp or extremely thin dentin: Use indirect pulp capping technique. - If accidental small pulp exposure but pulp bleeds and hemostasis is easily achieved: Direct pulp capping with bioactive material is possible but rarely required in this scenario.   **4. No Endodontic Therapy Indicated**   - RCT or vital pulp therapy (VPT) NOT indicated for reversible pulpitis[1](https://www.aae.org/specialty/wp-content/uploads/sites/2/2017/07/endodonticdiagnosisfall2013.pdf)[3](https://onlinelibrary.wiley.com/doi/10.1111/iej.13974)[10](https://www.msdmanuals.com/professional/dental-disorders/common-dental-disorders/pulpitis).   **5. Follow-Up**   - Symptoms should resolve after caries removal and restoration. - Reassess at 6–12 months (clinical and radiographic review). - Advise patient to return if pain becomes lingering, spontaneous, or if new symptoms arise.   **6. Patient Counseling**   - High prognosis (>95% return to full function/symptom-free) with simple restorative care. - Prompt management prevents progression to more serious pulp pathology.   **Key Summary Table**   | **Organization** | **Pulpal Diagnosis** | **Periapical Status** | **Recommended Treatment** | | --- | --- | --- | --- | | AAE | Reversible pulpitis | Normal | Remove caries, restore, monitor | | ESE | Reversible pulpitis | Normal | Selective caries removal, restore | | IES | Reversible pulpitis | Normal | Conservative caries removal, restoration |   **Key Clinical Takeaways**   - **Diagnosis**: Classic reversible pulpitis (brief cold pain, vital pulp, no apical pathology) - **Treatment**: Conservative caries removal, direct restoration, no endodontic intervention needed. - **Consensus**: All major guidelines (AAE, ESE, IES) align on this approach. - **Prognosis**: Excellent if promptly managed; periodic follow-up is advised.   **In summary:** A diagnosis of reversible pulpitis with normal apical tissues. All authoritative guidelines recommend conservative caries removal and restoration, with no need for root canal treatment. Success rates are extremely high if recognized and treated promptly. | **Comparative Diagnosis According to Evidence-Based Guidelines**  **Case Summary**   - **Patient**: 20-year-old female, upper left lateral incisor (#10) - **Chief complaint**: Sharp, transient pain to cold (beverages/air), immediate resolution after stimulus. - **Symptoms**: No lingering pain, no spontaneous pain, no biting pain. - **Clinical Findings**: Small carious lesion near existing intact restoration, healthy periodontium, no cracks, no tenderness. - **Radiographs**: Lesion confined to enamel-dentin junction, no pulpal or periapical pathology.   **AAE (American Association of Endodontists)**   - **Pulpal Diagnosis**: **Reversible Pulpitis**   - Pain is stimulus-dependent and resolves quickly after removal of stimulus, with no radiographic changes and no spontaneous symptoms[1](https://www.aae.org/specialty/wp-content/uploads/sites/2/2017/07/endodonticdiagnosisfall2013.pdf)[2](https://jcda.ca/article/d90). - **Periapical Diagnosis**: **Normal Apical Tissues**   - No apical pathology or tenderness.   *"Discomfort is experienced when a stimulus such as cold or sweet is applied and goes away within a couple of seconds... Typical etiologies may include exposed dentin (dentinal sensitivity), caries or deep restorations. No significant radiographic changes in the periapical region."*[*1*](https://www.aae.org/specialty/wp-content/uploads/sites/2/2017/07/endodonticdiagnosisfall2013.pdf)   - **Treatment**: Remove caries, seal/leakage, restore, monitor.   **ESE (European Society of Endodontology) Guidelines**   - **Diagnosis**: **Reversible Pulpitis, Normal Periapex**   - Quick, sharp pain that resolves, shallow to moderate carious lesion, no residual pain[3](https://britishendodonticsociety.org.uk/_userfiles/pages/files/duncan_et_al2019international_endodontic_journal.pdf)[4](https://onlinelibrary.wiley.com/doi/10.1111/iej.13974). - **Management**: Selective caries removal and minimally invasive restorative treatment with good isolation and a high-quality restoration. Use aseptic technique, magnification if available, and bioactive liner for deeper lesions is optional.   **Indian Endodontic Society (IES) / Contemporary Consensus**   - **Diagnosis**: **Reversible Pulpitis**   - Pain only with cold stimulus, subsides immediately. Classified as *mild symptomatic, indicative of reversible pulpal changes*[5](https://ies.org.in/images/pdf/vital-pulp-therapy-ies-position-statement.pdf). - **Management**: Conservative caries removal, vital pulp preservation, restore. Monitor and re-evaluate if any symptoms change.   **Consensus Table**   | **Guideline** | **Pulpal Diagnosis** | **Periapical Dx** | **Initial Management** | | --- | --- | --- | --- | | AAE | Reversible pulpitis | Normal | Remove caries, restore, monitor | | ESE | Reversible pulpitis | Normal | Selective caries removal, restore, asepsis, monitor | | IES/Contemporary Consensus | Reversible pulpitis | Normal | Conservative treatment, vital pulp preservation |   **Definitive, Guideline-Synthesized Treatment Plan**  **1. Caries Management**   - **Remove carious lesion** via minimally invasive technique (selective caries removal), using good field isolation (preferably rubber dam)[3](https://britishendodonticsociety.org.uk/_userfiles/pages/files/duncan_et_al2019international_endodontic_journal.pdf). - Avoid pulp exposure; do not over-instrument if caries is not deep.   **2. Restoration**   - **Place high-quality, well-sealed restoration** (composite preferred); if close to pulp, a calcium silicate liner (e.g., Biodentine/MTA) is optional but not strictly needed for such superficial lesions.   **3. Vital Pulp Preservation**   - If *unexpected pulp exposure* occurs and bleeding is controlled, a direct pulp cap with biocompatible material is acceptable, but normally not needed in such shallow lesions.   **4. Monitoring**   - Most cases resolve after restoration. Review symptoms and consider follow-up at 6–12 months with radiograph and sensibility testing to ensure recovery[1](https://www.aae.org/specialty/wp-content/uploads/sites/2/2017/07/endodonticdiagnosisfall2013.pdf)[5](https://ies.org.in/images/pdf/vital-pulp-therapy-ies-position-statement.pdf). - Advise: Return if pain becomes lingering, spontaneous, or there are new symptoms (swelling, pain on biting, etc).   **5. Patient Counseling**   - Explain that reversible pulpitis is diagnosed, with very high likelihood (>95%) of full recovery after conservative care[3](https://britishendodonticsociety.org.uk/_userfiles/pages/files/duncan_et_al2019international_endodontic_journal.pdf). - No endodontic (root canal) treatment is indicated; only consider escalation if symptoms progress.   **Key Points & Rationale**   - **Classic reversible pulpitis**: sharp, quick, stimulus-dependent pain, healthy pulp response, and no progression to pulp necrosis or apical disease[1](https://www.aae.org/specialty/wp-content/uploads/sites/2/2017/07/endodonticdiagnosisfall2013.pdf)[2](https://jcda.ca/article/d90)[5](https://ies.org.in/images/pdf/vital-pulp-therapy-ies-position-statement.pdf). - **Evidence and guidelines unanimously recommend**: minimally invasive caries removal and well-sealed restoration. - **No aggressive/surgical intervention is justified** unless clinical or radiographic signs worsen on review.   **In summary:** This is a textbook example of reversible pulpitis due to a shallow carious lesion, for which all major dental guidelines recommend conservative caries removal, prompt restoration, and routine monitoring. This approach optimally preserves pulp vitality and function, ensuring high prognosis and minimizing overtreatment risk |
| 6 | **Comparative Diagnosis: Major Guidelines and Classification**  **Case Recap**   - **Patient:** 45-year-old male, lower right lateral incisor (#34) - **Chief Complaint:** Pain while chewing and lingering sharp sensitivity to hot/cold. - **Symptoms:** Dull ache after chewing, sharp and prolonged thermal pain, no facial swelling or spontaneous pain. - **Clinical Findings:** Deep carious lesion under large restoration, tenderness to percussion, normal periodontal status. - **Vitality Tests:** Lingering pain to cold, intensified pain to heat, exaggerated/delayed EPT. - **Radiology:** Large carious lesion near pulp, PDL widening, no periapical radiolucency, marginal breakdown of restoration.   **AAE (American Association of Endodontists)**   - **Pulpal Diagnosis:** **Symptomatic Irreversible Pulpitis**   - Lingering pain to thermal stimuli (especially heat), exaggerated/delayed EPT, pulpal inflammation incapable of healing on its own. - **Periapical Diagnosis:** **Symptomatic Apical Periodontitis**   - Pain on chewing, percussion tenderness, and PDL widening without periapical radiolucency—early periapical inflammatory involvement12. - **Implication:** Non-surgical root canal treatment is indicated in mature teeth with these features, as the pulp is considered irreversibly inflamed and cannot recover by itself31.   **ESE (European Society of Endodontology)**   - **Diagnosis:** **Partial Irreversible Pulpitis** or **Symptomatic Irreversible Pulpitis**   - Persistent pain to heat/cold, dull ache after biting, deep caries up to the pulp4.   - ESE recognizes that inflammation may be initially limited to the coronal pulp. - **Classification:** Emphasizes careful diagnosis, accepting "partial irreversible pulpitis", meaning full pulpectomy (RCT) is not strictly required in all cases; **full pulpotomy is a viable option** in some scenarios (especially with proper case selection, hemostasis, and hydraulic calcium silicate cements)45. - **Implication:** Either **non-surgical RCT** or **full pulpotomy** (with modern protocols and materials) is evidence-supported, especially if bleeding control and healthy pulp are confirmed intraoperatively45.   **Indian Endodontic Society (IES)**   - **Diagnosis:** **Severe Symptomatic Irreversible Pulpitis**   - Severe, lingering symptoms to thermal and biting tests, and deep/proximal caries implies severe irreversible changes. - **Classification:** "Partial irreversible pulpitis confined to coronal pulp" can sometimes justify **full/partial pulpotomy**, but if bleeding is not controlled or pulp is necrotic, **root canal treatment (RCT)** is mandatory. - **Guidance:** IES recommends considering **full pulpotomy** if intraoperative hemostasis can be achieved in up to 5–10 minutes with a healthy pulp appearance. RCT is indicated if not6.   **Contemporary/Minimally Invasive Systems (Wolters et al., AAE Position)**   - Recognize the **continuum of pulpal inflammation** rather than rigid "reversible/irreversible." - **Vital Pulp Therapy (Full Pulpotomy)** is increasingly considered for cases with lingering pain, as long as uninflamed tissue can be left and bleeding is controlled within protocol limits735. - Current data shows **full pulpotomy** has outcomes comparable to RCT in carefully selected mature teeth with irreversible pulpitis5.   **Summary Table: Comparative Diagnosis and Treatment Options**   | **Guideline** | **Diagnosis** | **First-line Treatment** | **Alternative** | | --- | --- | --- | --- | | AAE | Symptomatic irreversible pulpitis, SAP | Non-surgical RCT | Full pulpotomy (select cases) | | ESE | (Partial) irreversible pulpitis, SAP | Full pulpotomy or RCT | (RCT if pulpotomy fails) | | IES | Severe irreversible pulpitis, SAP | Full pulpotomy (if hemostasis) or RCT | RCT if uncontrolled bleeding or necrosis | | Contemporary | Irreversible/partial irreversible pulpitis, SAP | Full pulpotomy (if protocol met) | RCT |   **Definitive, Evidence-Based Treatment Plan**  **1. Preoperative Steps**   - Verify restorability, remove all caries and assess pulp under **rubber dam isolation** and high magnification. - **Pain management**: profound local anesthesia.   **2. Primary Treatment (Decision Based on Intraoperative Findings)**  **A. If Pulp Exposure Occurs:**   - **Full Coronal Pulpotomy**   - Remove inflamed coronal pulp tissue to canal orifice.   - Achieve hemostasis (ideally within 5–10 min) with 2.5–5% NaOCl on cotton pellet.   - Inspect pulp: if tissue is uniformly red and healthy and hemostasis is maintained, continue.   - Place hydraulic calcium silicate cement (MTA, Biodentine) as pulp cap.   - Restore with well-sealed permanent composite restoration.   - Immediate post-op radiograph. - **Conversion to RCT**: If **bleeding is uncontrollable** (>10 min) or necrotic/abnormal pulp detected at orifice/root level.   - Proceed with non-surgical endodontic therapy in standard fashion.   **B. If No Pulp Exposure and Pulp Remains Covered:**   - Indirect pulp cap with hydraulic calcium silicate liner and well-sealed restoration. - However, given **lingering pain and periapical signs, pulp exposure is likely to occur**, so full pulpotomy is expected to be needed.   **3. Restorative Protocol**   - Permanent, durable, well-adapted restoration in the same session is critical to prevent microleakage. - Use composite with modern adhesives; consider coverage/crown if significant structure is lost.   **4. Follow-up**   - Post-op check at 1, 4, and 12 weeks, then 6 months, 1 year, and annually for at least 4 years645. - Assess symptoms, pulp sensibility (if partial vital pulp retained), clinical and radiographic integrity, and restoration seal. - Success: absence of pain, normal function, radiographic healing or stability, and no adverse symptoms.   **5. Patient Counseling**   - Discuss **success rates**: both full pulpotomy and RCT yield >85-95% success in mature permanent teeth if protocols are followed35. - Explain rationale: pulp preservation is possible and often preferable if hemostasis and healthy tissue can be confirmed; otherwise, RCT is the standard. - Advise to return if symptoms persist or worsen.   **Key Evidence-Based Points**   - **Diagnosis:** Symptomatic irreversible pulpitis with symptomatic apical periodontitis due to deep caries under a failed restoration231. - **All major contemporary guidelines** support **full pulpotomy using hydraulic calcium silicate cement as the initial treatment**, with escalation to RCT if protocol cannot be achieved or if follow-up fails76435. - **RCT remains the gold standard** if any protocol exclusion/criteria are not met or pulpotomy fails. - **Strict asepsis, magnification, hemostasis, and contemporary bioceramic materials are paramount for success.** - **Immediate, high-quality restoration is critical** for long-term outcome.   **In summary:** This case is classical symptomatic irreversible pulpitis with symptomatic apical periodontitis. All major international guidelines and recent position statements (AAE, ESE, IES, etc.) now allow or prefer a staged approach:   - **First-line:** Full pulpotomy (with rigorous protocol, hydraulic calcium silicate cement, and excellent restoration) - **If hemostasis or healthy tissue not found:** Immediate escalation to RCT. Long-term monitoring is essential, and the patient should receive clear counseling about signs of success or failure and when to seek further care764351 | **Comparative Diagnosis: Guidelines and Classification**  **Case Recap**   - **Patient:** 45-year-old male - **Tooth:** Lower right lateral incisor (#34) - **Presenting symptoms:** Dull ache after chewing, sharp/lingering pain to hot and cold - **Findings:** Deep caries under large restoration with marginal breakdown, percussion tenderness, delayed/exaggerated EPT response, PDL widening apically, no periapical radiolucency   **American Association of Endodontists (AAE)**   - **Pulpal Diagnosis:** **Symptomatic Irreversible Pulpitis**   - Criteria: Lingering pain to hot/cold, sharp stimulus-dependent pain, pain on chewing, pulpal inflammation incapable of healing[1](https://www.aae.org/specialty/wp-content/uploads/sites/2/2017/07/endodonticdiagnosisfall2013.pdf)[2](https://pmc.ncbi.nlm.nih.gov/articles/PMC11991903/)[3](https://my.clevelandclinic.org/health/diseases/23536-pulpitis)[4](https://www.dentalcare.com/en-us/ce-courses/ce562/pulpal-diagnosis)[5](https://link.springer.com/article/10.1007/s00784-024-05814-z)[6](https://www.aae.org/specialty/wp-content/uploads/sites/2/2017/07/aaeconsensusconferencerecommendeddiagnosticterminology.pdf).   - Positive response to EPT and lingering thermal pain are key features. - **Periapical Diagnosis:** **Early Symptomatic Apical Periodontitis**   - Criteria: Pain on percussion, PDL widening without frank radiolucency[2](https://pmc.ncbi.nlm.nih.gov/articles/PMC11991903/). - **Rationale:** Presence of deep caries, persistent thermal and biting pain, and radiographic apical changes indicate pulp cannot recover by itself and peri-radicular tissues are involved.   **European Society of Endodontology (ESE S3 Guideline)**   - **Diagnosis:** **Symptomatic Irreversible Pulpitis / Early Apical Periodontitis**   - Matching criteria: Dull post-chewing ache, prolonged thermal sensitivity, percussion and bite pain. Early PDL changes are indicative of early spread to periapical tissues, even absent obvious radiolucency[7](https://onlinelibrary.wiley.com/doi/10.1111/iej.13974)[8](https://onlinelibrary.wiley.com/doi/full/10.1111/iej.14067). - **Treatment Emphasis:** Both vital pulp therapy (VPT, i.e., pulpotomy) and root canal therapy are considered, depending on pulpal status and hemorrhage control after caries removal.   **Contemporary and Indian Endodontic Society (IES)**   - **Diagnosis:** **Symptomatic Irreversible Pulpitis**   - Clinical and radiographic signs align with global guidelines: significant biting pain, lingering thermal pain, deep caries, and early apical changes[2](https://pmc.ncbi.nlm.nih.gov/articles/PMC11991903/)[3](https://my.clevelandclinic.org/health/diseases/23536-pulpitis). - **Treatment:** Either full pulpotomy (if pulp remains partially vital) or root canal therapy, favoring RCT in adults or if bleeding persists after pulp amputation.   **Summary Table**   | **Guideline** | **Pulpal Diagnosis** | **Apical Status** | **Principal Therapy** | | --- | --- | --- | --- | | AAE | Symptomatic irreversible pulpitis | Early symptomatic apical periodontitis | RCT (or VPT in select cases) | | ESE | Symptomatic irreversible pulpitis | Early apical periodontitis | RCT or full pulpotomy (case-dependent) | | IES | Symptomatic irreversible pulpitis | Early apical involvement | RCT preferred, VPT if pulp remains vital |   **Definitive Treatment Plan (Evidence-Based Synthesis)**  **1. Pre-Operative Phase**   - Confirm diagnosis using repeated thermal/EPT and detailed radiograph. - Discuss findings and options with patient: outline RCT as gold standard, mention vital pulp therapy only if pulp appears vital and bleeding is readily controllable.   **2. Primary Treatment**  **A. Root Canal Treatment (RCT) — Gold Standard**   - **Local anesthesia** and **rubber dam isolation**. - **Full caries removal** and *access opening*. - *Remove entire pulp* (pulpectomy). - **Debridement and cleaning**: Shape/clean canals with copious sodium hypochlorite irrigation. - Temporary calcium hydroxide dressing if significant exudate, otherwise proceed to obturation. - **Obturation**: Gutta-percha and bioceramic or epoxy sealer. - **Definitive restoration**, ideally with adhesive bonded core/composite or full-coverage if needed.   **B. Vital Pulp Therapy (Selective)**   - Consider if pulp exposure is small, pulp appears healthy, and bleeding is readily controlled. - **Full pulpotomy** with calcium silicate cement (MTA, Biodentine)[5](https://link.springer.com/article/10.1007/s00784-024-05814-z)[7](https://onlinelibrary.wiley.com/doi/10.1111/iej.13974)[9](https://www.frontiersin.org/journals/dental-medicine/articles/10.3389/fdmed.2022.1048137/full). - Restore as above, with documented informed consent regarding possible need for RCT if symptoms do not resolve.   **3. Follow-Up and Monitoring**   - **6–12 week review:** Clinical check, ensure no pain, check pulp/periapical status. - **6–12 month radiograph:** Look for resolution of PDL widening, absence of periapical lesions. - **Long-term:** Annual recall, monitor for recurrence or failure.   **4. Supportive Therapy**   - Prescription NSAIDs for pain management (ibuprofen 600 mg q6h as needed, max 2,400 mg/d)[10](https://jcda.ca/article/d90). - Advise: *Antibiotics are not indicated unless there is cellulitis or systemic involvement*.   **5. Patient Counseling**   - Explain high success rate for RCT for irreversible pulpitis (90–95%). - Advise on importance of prompt, high-quality permanent restoration. - Stress need for prompt review if symptoms persist or worsen.   **Key Evidence-Based Points**   - **Diagnosis:** Symptomatic irreversible pulpitis with early apical periodontitis (lingering, sharp pain, percussion sensitivity, deep caries with marginal breakdown, PDL widening). - **Consensus Therapy:** Root canal therapy is preferred, with full pulpotomy as a contemporary alternative in select, controlled situations. - **Restorative Considerations:** Bioactive core/liners are beneficial post-pulpotomy; a well-sealed permanent restoration is mandatory for healing. - **Best Outcomes:** Early intervention while tooth is still vital delivers best prognosis.   **In summary:** All modern evidence-based and international guidelines converge: this scenario should be treated with root canal therapy (RCT) as the gold standard. Pulpotomy may be an alternative if pulp is vital and after careful intraoperative assessment, but lingering pain with percussion sensitivity and deep caries nearly always denotes irreversible pulpitis and early apical periodontitis, requiring complete debridement and obturation for definitive healing | **Comparative Diagnosis According to Major Guidelines**  **Case Summary**   - **Patient:** 45-year-old male, lower right lateral incisor (#34) - **Chief complaint:** Dull ache after chewing, sharp and lingering pain to heat and cold - **Clinical findings:** Deep carious lesion beneath large, broken restoration; tenderness to percussion; positive, delayed EPT; PDL widening apically; no periapical radiolucency - **No swelling, mobility, or periodontal issues**   **Classification According to Key Recommendations**  **AAE (American Association of Endodontists)**   - **Pulpal Diagnosis:** **Symptomatic Irreversible Pulpitis**   - *Defining features*: Lingering pain with hot/cold stimuli; spontaneous, dull ache after chewing; percussion sensitivity[1](https://pmc.ncbi.nlm.nih.gov/articles/PMC11991903/)[2](https://www.dentalcare.com/en-us/ce-courses/ce562/pulpal-diagnosis)[3](https://www.msdmanuals.com/professional/dental-disorders/common-dental-disorders/pulpitis). - **Periapical Diagnosis:** **Symptomatic Apical Periodontitis (early)**   - *Defining features*: Tenderness to percussion; PDL widening without frank radiolucency[1](https://pmc.ncbi.nlm.nih.gov/articles/PMC11991903/). - **Treatment:** Vital pulp cannot heal; endodontic intervention required[2](https://www.dentalcare.com/en-us/ce-courses/ce562/pulpal-diagnosis)[4](https://www.aae.org/specialty/wp-content/uploads/sites/2/2018/04/TreatmentStandards_Whitepaper.pdf).   **ESE (European Society of Endodontology) Guidelines**   - **Diagnosis:** **Symptomatic Irreversible Pulpitis with Early Apical Periodontitis**   - Pain persists after stimulus; pulp inflamed to the point of no return; tenderness to percussion suggests periapical inflammation[5](https://onlinelibrary.wiley.com/doi/10.1111/iej.13974)[6](https://onlinelibrary.wiley.com/doi/abs/10.1111/iej.13974). - **Recommended Management:** Full pulpectomy/root canal treatment. Selective caries removal to avoid unnecessary pulp exposure is not indicated once irreversible pulpitis is diagnosed and symptoms match[5](https://onlinelibrary.wiley.com/doi/10.1111/iej.13974)[6](https://onlinelibrary.wiley.com/doi/abs/10.1111/iej.13974)[7](https://onlinelibrary.wiley.com/doi/10.1111/iej.13128).   **Indian Endodontic Society (IES)/Contemporary Literature**   - **Diagnosis:** **Irreversible Pulpitis (Symptomatic) with Early Apical Periodontitis**   - Lingering, sharp pain on hot/cold and biting pain point to irreversible changes[8](https://pmc.ncbi.nlm.nih.gov/articles/PMC6174009/)[9](https://britishendodonticsociety.org.uk/_userfiles/pages/files/bjrndal_et_al2019international_endodontic_journal_1.pdf). - **Management:** Root canal treatment is standard for vital, irreversibly inflamed pulps; vital pulp therapy (VPT) is not recommended in symptomatic cases with clear irreversible pulpitis[9](https://britishendodonticsociety.org.uk/_userfiles/pages/files/bjrndal_et_al2019international_endodontic_journal_1.pdf).   **Consensus Summary Table**   | **Guideline** | **Pulpal Diagnosis** | **Periapical Diagnosis** | **Clinical Criteria** | **Recommended Treatment** | | --- | --- | --- | --- | --- | | AAE | Symptomatic Irreversible Pulpitis | Symptomatic Apical Periodontitis | Lingering hot/cold pain, bite/percussion pain, PDL widening | RCT or full pulpectomy[1](https://pmc.ncbi.nlm.nih.gov/articles/PMC11991903/)[2](https://www.dentalcare.com/en-us/ce-courses/ce562/pulpal-diagnosis) | | ESE | Symptomatic Irreversible Pulpitis | Early Apical Periodontitis | Prolonged pain, deep caries, apical tenderness/no radiolucency | RCT[5](https://onlinelibrary.wiley.com/doi/10.1111/iej.13974)[6](https://onlinelibrary.wiley.com/doi/abs/10.1111/iej.13974) | | IES/Contemporary | Symptomatic Irreversible Pulpitis | Early Apical Periodontitis | Persistent symptoms after stimulus, tenderness | RCT (not VPT)[8](https://pmc.ncbi.nlm.nih.gov/articles/PMC6174009/)[9](https://britishendodonticsociety.org.uk/_userfiles/pages/files/bjrndal_et_al2019international_endodontic_journal_1.pdf) |   **Definitive, Evidence-Based Treatment Plan**  **1. Initial Assessment**   - Confirm diagnosis with repeated clinical and vitality tests if necessary. - Pre-op radiograph to verify root anatomy and rule out cracks or fractures.   **2. Definitive Non-Surgical Root Canal Treatment (RCT)**   - **Aseptic Technique:** Strict rubber dam isolation. - **Access & Debridement:** Conservative access for full caries removal and canal negotiation. - **Working Length:** Use apex locator and radiograph confirmation. - **Chemomechanical Preparation:** Rotary/hand files with copious irrigation (2.5–5.25% NaOCl; EDTA for smear layer). - **Interim Disinfection:** If persistent symptoms or suspected microbial load, interim calcium hydroxide medicament may be placed. - **Obturation:** Gutta-percha with bioceramic (calcium silicate-based) sealer. - **Immediate, Well-Sealed Restoration:** Composite or crown depending on residual tooth structure.   **3. Follow-Up Protocol**   - Clinical and radiographic assessment at 6 and 12 months; look for resolution of tenderness and any periapical change. - Continue annual follow-ups for 4 years as ESE recommends[5](https://onlinelibrary.wiley.com/doi/10.1111/iej.13974)[9](https://britishendodonticsociety.org.uk/_userfiles/pages/files/bjrndal_et_al2019international_endodontic_journal_1.pdf).   **4. Patient Counseling**   - Emphasize need for early root canal due to irreversible pulpal inflammation. - Discuss high success rates (85–95% for well-executed RCT in similar cases). - Advise to report any swelling, increased pain, or complications between appointments.   **5. Alternative Considerations**   - Extraction only if tooth is non-restorable, or if RCT is not feasible. - MTA/biodentine vital pulp therapies are not indicated with these symptoms.   **Key Points & Rationale**   - **Lingering pain to thermal stimulus and bite pain are classic for irreversible pulpitis**—requiring full root canal, not conservative pulp therapy. - **All guidelines (AAE, ESE, IES) concur**: when symptoms and tests match, RCT is necessary—further delay risks necrosis, infection, and tooth loss[1](https://pmc.ncbi.nlm.nih.gov/articles/PMC11991903/)[2](https://www.dentalcare.com/en-us/ce-courses/ce562/pulpal-diagnosis)[5](https://onlinelibrary.wiley.com/doi/10.1111/iej.13974)[9](https://britishendodonticsociety.org.uk/_userfiles/pages/files/bjrndal_et_al2019international_endodontic_journal_1.pdf). - **Modern bioceramic sealers and aseptic technique optimize long-term outcomes**. - **Early RCT prevents evolution to abscess or chronic infection state.**   **In summary:** This scenario is textbook symptomatic irreversible pulpitis with early apical involvement, for which every major guideline recommends standard non-surgical root canal treatment as the first-line, evidence-based intervention to preserve tooth function and eliminate pain and infection risk[1](https://pmc.ncbi.nlm.nih.gov/articles/PMC11991903/)[2](https://www.dentalcare.com/en-us/ce-courses/ce562/pulpal-diagnosis)[5](https://onlinelibrary.wiley.com/doi/10.1111/iej.13974)[9](https://britishendodonticsociety.org.uk/_userfiles/pages/files/bjrndal_et_al2019international_endodontic_journal_1.pdf)[4](https://www.aae.org/specialty/wp-content/uploads/sites/2/2018/04/TreatmentStandards_Whitepaper.pdf). |
| 7 | **Comparative Diagnosis According to Major Guidelines**  **Case Recap**   - **Patient:** 38-year-old female, upper right molar (#3) - **Chief complaint:** Brief, sharp pain with cold stimulus that subsides immediately; noticed a pimple-like bump on the gums - **Clinical findings:** Draining sinus tract, small carious lesion not involving the pulp, buccal swelling near the apex, slight tenderness to percussion - **Vitality tests:** No response to cold or EPT - **Radiograph:** Well-defined large periapical radiolucency (~5mm), loss of lamina dura, sclerotic bone borders, restoration intact   **Diagnostic Classification Comparison**  **AAE (American Association of Endodontists)**   - **Pulpal Diagnosis:** **Pulp Necrosis**   - Nonresposive to both cold and EPT; tooth is nonvital - **Periapical Diagnosis:** **Chronic Apical Abscess**   - Draining sinus tract and well-defined periapical radiolucency with loss of lamina dura; mild/absent discomfort typical - **Notes:** The cold sensitivity reported may have been an earlier symptom before pulp necrosis evolved1.   **ESE (European Society of Endodontology)**   - **Diagnosis:** **Necrotic Pulp with Chronic Apical Abscess**   - Sinus tract with periapical radiolucency, nonvital pulp, sclerotic margin - **Key insights:** Sinus tract and periapical lesion signal long-standing infection and pulp death; conservative or vital pulp therapies are absolutely contraindicated23.   **Indian Endodontic Society (IES)**   - **Diagnosis:** **Pulp Necrosis with Chronic Apical Abscess**   - Negative cold/EPT; sinus tract and radiographic signs; caries not involving pulp indicates pathway for infection was through restoration/caries interface. - **Notes:** The presence of a sinus tract and radiographic findings confirm diagnosis even if the patient presents without acute symptoms4.   **Wolters et al.: Minimally Invasive Endodontics**   - **Diagnosis:** **Beyond scope for minimally invasive VPT**   - Pulp necrosis and established periapical pathology (chronic abscess) preclude any minimally invasive or VPT approaches; necessitate full root canal therapy or extraction5.  | **Guideline** | **Pulpal Diagnosis** | **Periapical Diagnosis** | **Key Criteria** | **Treatment Indicated** | | --- | --- | --- | --- | --- | | AAE | Pulp necrosis | Chronic apical abscess | Nonvital to pulp tests, draining sinus tract, apical radiolucency | Root canal therapy (RCT) | | ESE | Pulp necrosis | Chronic apical abscess | Sinus tract, periapical lesion, necrotic pulp, no vitality | RCT with Ca-silicate sealer | | IES | Pulp necrosis | Chronic apical abscess | Nonvital pulp, radiographic lesion, sinus tract | RCT, no VPT, strong disinfection | | Wolters et al. | Pulp necrosis | Chronic apical abscess | Absence of vital pulp excludes VPT | RCT mandatory |   **Guideline-Based Definitive Treatment Plan**  **1. Establish Diagnosis & Patient Preparation**   - Confirm using vitality tests, history, and radiographs. - Use gutta-percha tracing to confirm sinus tract origin (usually points to involved root apex)1. - Explain diagnosis, procedure, and prognosis to patient.   **2. Non-Surgical Root Canal Therapy (RCT)**   - **Aseptic Technique:** Strict rubber dam isolation and tooth disinfection624. - **Access & Debridement:** Conservative access through restoration, removal of necrotic debris. - **Irrigation Protocol:** Copious irrigation with 2.5–5.25% NaOCl and EDTA; consider passive ultrasonic activation. - **Intracanal Medicament:** Place calcium hydroxide between appointments if persistent exudate or symptoms, or as an inter-appointment dressing for chronic infection2. - **Working Length & Cleaning:** Use apex locator and confirm by radiograph. - **Obturation:** Calcium silicate-based sealer (e.g., MTA, Biodentine, bioceramic sealer) with gutta-percha, providing a thorough coronal seal642. - **Restoration:** Immediate core buildup and plan for full coverage if indicated due to loss of tooth structure.   **3. Adjunctive Care & Considerations**   - **Antibiotics:** Only if there are signs of systemic spread (swelling, fever), otherwise not needed even for chronic abscesses2. - **Analgesics:** As needed for post-operative pain.   **4. Follow-up and Monitoring**   - **Short term:** Re-evaluate in 1–2 weeks for sinus tract closure and symptom resolution. - **Long term:** Clinical and radiographic review at 6, 12, and 24 months; expect sinus tract resolution and radiographic evidence of apical healing234.   **5. Criteria for Success**   - **Clinical:** Absence of pain, sinus tract closure, tooth remains functional. - **Radiographic:** Gradual reduction or disappearance of radiolucency and sclerotic margins. - **If unresolved:** Consider surgical intervention or retreatment.   **Key Rationale and Evidence Highlights**   - Necrotic, nonvital pulp with sinus tract and apical lesion is NOT a candidate for vital pulp therapy under any modern guideline643. - Immediate RCT is standard of care; prognosis is excellent if performed to high standard—success rates 85–95%72. - Chronic sinus tracts often resolve completely after proper debridement and obturation without need for surgical excision12. - Antibiotics are NOT required unless there is systemic involvement; focus should be on infection removal at the source2. - Proper coronal seal (immediate permanent restoration) is critical to prevent reinfection426.   **In Summary**  This case demonstrates classic findings of pulp necrosis and chronic apical abscess in a previously symptomatic tooth: nonvital on tests, sinus tract, and an apical radiolucency. All major guidelines (AAE, ESE, IES, contemporary) recommend non-surgical root canal therapy as first-line treatment, with critical steps being thorough cleaning/disinfection, calcium silicate-based obturation, and a well-sealed restoration. Follow-up is essential to confirm healing. RCT in these circumstances provides long-term retention and function with very high success | **Comparative Diagnosis According to Guidelines**  **Case Summary**   - **Patient**: 38-year-old female, upper right molar (#3) - **Chief complaint**: Cold sensitivity (brief, sharp pain that resolves), no spontaneous pain, no biting pain, pimple on gum (buccal sinus tract) - **Testing & Exam**:   - Cold/EPT: No response   - Percussion: Slight tenderness   - Palpation: Buccal swelling   - Radiograph: Small carious lesion (not near pulp), large well-defined periapical radiolucency (~5mm), loss of lamina dura, sclerotic bone border, restoration intact   - Sinus tract present   **Diagnosis Comparison**  **AAE (American Association of Endodontists)**   - **Pulpal Diagnosis**: **Pulp necrosis**   - No response to cold or EPT with a sinus tract is diagnostic for necrosis[1](https://sites.ualberta.ca/~enoch/Resources/Endo.pdf)[2](https://www.scribd.com/document/699129100/pulp-pathosis)[3](https://ostrowonline.usc.edu/odontotest-irreversible-pulpitis/). - **Periapical Diagnosis**: **Chronic Apical Abscess**   - Sinus tract, large radiolucency, sclerotic border, slight percussion tenderness but no swelling or acute symptoms[4](https://pmc.ncbi.nlm.nih.gov/articles/PMC7398993/)[5](https://exodontia.info/wp-content/uploads/2021/07/Endo_Topics_2004._Classification_Diagnosis_Clinical_Manifestations_of_Apical_Periodontitis.pdf). - **Key Features**: Chronic infection drains via sinus tract, pulpal necrosis causes periapical lesion.   **ESE (European Society of Endodontology)**   - **Pulpal Status**: **Necrotic pulp**   - Confirmed by non-responsiveness to testing in the presence of periapical pathology[6](https://onlinelibrary.wiley.com/doi/10.1111/iej.13974). - **Periapical Status**: **Chronic Apical Periodontitis with Abscess**   - Draining sinus and apical radiolucency are classic for chronic abscess; ESE recommends root canal for all necrotic cases, regardless of previous signs of episodic reversible symptoms[6](https://onlinelibrary.wiley.com/doi/10.1111/iej.13974)[7](https://www.ncbi.nlm.nih.gov/books/NBK589656/). - **Key Features**: Emphasize thorough debridement, aseptic technique.   **Indian Endodontic Society (IES) & Contemporary Literature**   - **Diagnosis**: **Necrotic pulp with chronic apical periodontitis/abscess**   - Non-vital, draining sinus tract, periapical lesion, absence of acute symptoms[2](https://www.scribd.com/document/699129100/pulp-pathosis)[8](https://biomedres.us/fulltexts/BJSTR.MS.ID.005865.php). - **Key Message**: All guidelines agree management is RCT, not vital pulp therapy.  | **Guideline** | **Pulpal Diagnosis** | **Periapical Diagnosis** | **Recommended Therapy** | | --- | --- | --- | --- | | AAE | Pulp necrosis | Chronic apical abscess | Nonsurgical root canal | | ESE | Necrotic pulp | Chronic apical periodontitis/abscess | Nonsurgical root canal | | IES | Necrotic pulp | Chronic apical abscess | Nonsurgical root canal |   **Definitive, Evidence-Based Treatment Plan**  **1. Pre-Operative Steps**   - Confirm diagnosis: Pulp necrosis with chronic apical abscess (sinus tract). - Review restorability; assess for cracks (none reported). - Explain findings, prognosis, and recommend RCT.   **2. Nonsurgical Root Canal Treatment (RCT)**  **First Visit**   - Profound anesthesia, rubber dam isolation. - Gain conservative access; confirm necrosis. - Locate/establish canal patency, determine working length. - Copious irrigation (2.5–5.25% NaOCl); gentle filing to clean canal, avoid extruding debris/apical infection[6](https://onlinelibrary.wiley.com/doi/10.1111/iej.13974)[9](https://my.clevelandclinic.org/health/diseases/23573-pulp-necrosis). - **Intracanal Calcium Hydroxide** if exudate persists or if anatomical complexity delays completion. - Temporary, well-sealed restoration.   **Second Visit (if needed)**   - Assess symptom resolution (sinus tract usually resolves in days–weeks). - Complete chemo-mechanical preparation and irrigation (NaOCl + EDTA); ensure dry canal. - **Obturation**: Gutta-percha with bioactive sealer (calcium silicate-based). - **Final restoration:** Prompt, well-adapted composite/crown depending on tooth structure.   **3. Post-Operative and Follow-Up Protocol**   - Analgesia only as needed; antibiotics not indicated unless systemic signs present[10](https://pmc.ncbi.nlm.nih.gov/articles/PMC3623375/). - Re-examine at 2–4 weeks for sinus tract closure and pain relief. - Radiographs at 6 months and 1 year to monitor bone healing and resolution of periapical radiolucency[4](https://pmc.ncbi.nlm.nih.gov/articles/PMC7398993/)[6](https://onlinelibrary.wiley.com/doi/10.1111/iej.13974). - Reinforce oral hygiene and importance of review visits.   **4. Alternative/Adjunct Treatment**   - **Surgical Endodontics**: Only if RCT fails and periapical lesion persists. - **Extraction**: If deemed nonrestorable at any point or patient preference.   **5. Patient Counseling**   - Explain cause (necrotic tooth, chronic abscess), rationale for RCT, and high success rates (>85–90%). - Emphasize avoidance of antibiotics unless infection spreads systemically. - Prognosis excellent if treatment protocol followed completely.   **Key Evidence Points**   - Sinus tract with necrotic pulp and large apical radiolucency = chronic apical abscess[2](https://www.scribd.com/document/699129100/pulp-pathosis)[4](https://pmc.ncbi.nlm.nih.gov/articles/PMC7398993/)[8](https://biomedres.us/fulltexts/BJSTR.MS.ID.005865.php). - **All current guidelines recommend nonsurgical root canal as first-line, definitive treatment**—never vital pulp therapy or extraction unless non-restorable[6](https://onlinelibrary.wiley.com/doi/10.1111/iej.13974)[9](https://my.clevelandclinic.org/health/diseases/23573-pulp-necrosis)[11](https://www.aae.org/specialty/wp-content/uploads/sites/2/2017/07/2014treatmentoptionsguidefinalweb.pdf). - Good prognosis, provided aseptic, thorough cleaning and proper restoration are obtained.   **In summary:** The patient has a classic case of pulp necrosis with chronic apical abscess as per all global recommendations (AAE, ESE, IES), best treated with nonsurgical root canal therapy and prompt, permanent restoration. Careful follow-up is essential for long-term tooth retention and full healing. | **Comparative Diagnosis According to Major Guidelines**  **Case Summary**   - **Patient**: 38-year-old female, upper right molar (#3) - **Symptoms**: Brief, sharp cold pain subsiding immediately; no spontaneous pain; not biting-sensitive; "pimple-like" gum bump (draining sinus tract) - **Tests/Findings**: No cold/EPT response (non-vital), slight percussion tenderness, buccal swelling at apex. Radiograph: small caries, large periapical radiolucency (~5mm), loss of lamina dura, sclerotic bone borders, intact restoration.   **Classification According to Key Recommendations**  **AAE (American Association of Endodontists)**   - **Pulpal Diagnosis:** **Pulp Necrosis**   - Nonvital on cold/EPT testing, no vitality, large periapical lesion. - **Periapical Diagnosis:** **Chronic Apical Abscess**   - Sinus tract, large radiolucency, sclerotic border, minimal pain, gradual onset[1](https://www.aae.org/specialty/wp-content/uploads/sites/2/2017/07/endodonticdiagnosisfall2013.pdf)[2](https://www.scribd.com/document/612805467/AAE-Classification)[3](https://decisionsindentistry.com/article/universal-classification-endodontic-diagnosis/). - **Treatment:** Non-surgical root canal therapy (RCT). Extraction if non-restorable[1](https://www.aae.org/specialty/wp-content/uploads/sites/2/2017/07/endodonticdiagnosisfall2013.pdf)[2](https://www.scribd.com/document/612805467/AAE-Classification)[3](https://decisionsindentistry.com/article/universal-classification-endodontic-diagnosis/).   **ESE (European Society of Endodontology)**   - **Diagnosis:** **Pulp Necrosis with Apical Periodontitis (Chronic Apical Abscess)**   - Guidelines apply to mature teeth with necrotic pulp and periapical radiolucency.   - Sinus tract requires addressing infection at source (RCT or extraction), not surgery or antibiotics except with systemic involvement[4](https://pmc.ncbi.nlm.nih.gov/articles/PMC11991915/)[5](https://onlinelibrary.wiley.com/doi/10.1111/iej.13974). - **Treatment:** Conventional RCT as first-line; suture tract typically resolves within 7–14 days after source elimination[4](https://pmc.ncbi.nlm.nih.gov/articles/PMC11991915/)[6](https://pmc.ncbi.nlm.nih.gov/articles/PMC5573483/)[7](https://pmc.ncbi.nlm.nih.gov/articles/PMC6468203/).   **Indian Endodontic Society (IES)/Contemporary Consensus**   - **Diagnosis:** **Necrotic Pulp with Apical Chronic Abscess**   - Sinus tract, nonvital, radiolucency present, classic for necrotic pulp with apical infection. - **Management:** Root canal treatment/chemo-mechanical debridement and obturation in restorable teeth; use of intracanal medicaments (calcium hydroxide) may accelerate healing[6](https://pmc.ncbi.nlm.nih.gov/articles/PMC5573483/)[8](https://jpedres.org/articles/iatrogenic-cutaneous-sinus-tract-of-dental-origin-case-report/jpr.96158).   **Summary Table**   | **Guideline** | **Pulpal Diagnosis** | **Periapical Diagnosis** | **Defining Features** | **Definitive Treatment** | | --- | --- | --- | --- | --- | | AAE | Pulp necrosis | Chronic apical abscess | Nonvital, sinus tract, large radiolucency | Non-surgical RCT or extraction | | ESE | Pulp necrosis | Apical abscess | Sinus tract, periapical lesion, necrotic pulp | Conventional RCT | | IES | Pulp necrosis | Chronic apical abscess | Draining sinus, radiolucency, nonvital pulp | RCT + calcium hydroxide medicament |   **Definitive, Evidence-Based Treatment Plan (All Major Guidelines)**  **1. Pre-Operative Assessment**   - Reconfirm diagnosis (repeat pulp tests if needed, trace sinus tract if source is uncertain). - Assess tooth restorability, patient’s overall health, and any contraindications to treatment.   **2. Non-Surgical Root Canal Therapy (RCT) – First-Line Treatment**   - **Aseptic technique:** Use rubber dam isolation. - **Access & Initial Cleaning:** Access cavity, confirm necrosis. Locate canals. - **Working Length:** Use apex locator and confirm radiographically. - **Debridement & Disinfection:**   - Remove necrotic tissue from all canals.   - **Copious irrigation** (2.5–5.25% NaOCl).   - Place **calcium hydroxide** as intracanal medicament as interim (recommended for sinus-tract and large lesion) between appointments[6](https://pmc.ncbi.nlm.nih.gov/articles/PMC5573483/). - **Temporary Filling:** Well-sealed until symptoms subside.   **3. Definitive Obturation & Restoration**   - **Once drainage ceases and sinus tract closes (7–14 days):**   - Re-enter, irrigate, dry canals.   - **Obturation:** Use gutta-percha/sealer (preferably calcium silicate-based)[1](https://www.aae.org/specialty/wp-content/uploads/sites/2/2017/07/endodonticdiagnosisfall2013.pdf)[4](https://pmc.ncbi.nlm.nih.gov/articles/PMC11991915/).   - **Permanent Restoration:** Prompt coronal seal (amalgam/composite/crown depending on tooth structure integrity).   **4. Monitoring & Follow-Up**   - Most sinus tracts heal within 2 weeks after successful canal disinfection[9](https://scholarhub.ui.ac.id/cgi/viewcontent.cgi?article=1460&context=jdi)[6](https://pmc.ncbi.nlm.nih.gov/articles/PMC5573483/)[7](https://pmc.ncbi.nlm.nih.gov/articles/PMC6468203/). - Clinical/radiographic review at 6–12 months: assess for healing of lesion and sinus tract closure. - If no resolution or persistent infection, consider surgical intervention (apicoectomy) or retreatment.   **5. Adjuncts/Patient Counseling**   - **Antibiotics generally not needed** unless systemic symptoms (fever/swelling)[7](https://pmc.ncbi.nlm.nih.gov/articles/PMC6468203/). - Extraction only if tooth is unrestorable. - Emphasize need for definitive restoration and regular follow-up for full lesion healing and function.   **Key Points & Rationale**   - **All major guidelines (AAE, ESE, IES, consensus reports) agree:** The definitive treatment for a mature tooth with necrotic pulp, large periapical radiolucency, and draining sinus tract is non-surgical root canal therapy. - **Sinus tract** will predictably heal after source removal via successful RCT—antibiotics/surgical excision alone are ineffective and unnecessary[9](https://scholarhub.ui.ac.id/cgi/viewcontent.cgi?article=1460&context=jdi)[10](https://pubmed.ncbi.nlm.nih.gov/19228218/)[6](https://pmc.ncbi.nlm.nih.gov/articles/PMC5573483/)[7](https://pmc.ncbi.nlm.nih.gov/articles/PMC6468203/). - **Calcium hydroxide** accelerates healing as intracanal medicament. - **Prompt, well-sealed restoration** is essential to prevent reinfection and ensure long-term success.   **In summary:** This case exemplifies necrotic pulp with chronic apical abscess manifesting as a draining sinus tract. All international recommendations mandate conventional root canal therapy (with interim medicament), leading to healing of the periapical lesion and resolution of the sinus tract. Extraction is reserved for cases where the tooth is non-restorable. Antibiotics and surgical excision of the tract are not needed if the primary infection is addressed by RCT. |
| 8 | **Comparative Diagnosis According to Major Recommendations**  **Case Recap**   - **Patient:** 50-year-old male, lower left canine (#22) - **Chief Complaint:** Sharp pain when chewing; intermittent sensitivity to hot and cold, subsides quickly after removing stimulus - **Findings:** Deep carious lesion on lingual surface, large existing amalgam with marginal breakdown, no visible cracks/fractures, tenderness to percussion and bite, slight PDL widening at apex, no radiolucency or pulp necrosis, pulp still responsive - **No spontaneous or night pain.**   **Diagnostic Classification Comparison**  **American Association of Endodontists (AAE)**   - **Pulpal Diagnosis:** **Symptomatic Irreversible Pulpitis**   - Sharp, immediate pain with cold/hot that subsides quickly but accompanied by pain on biting and percussion, deep caries approaching—classic symptoms for irreversible pulpitis (even if lingering <30 seconds, strong mechanical and hot/cold sensitivity with deep caries signals non-reversible inflammation). - **Periapical Diagnosis:** **Symptomatic Apical Periodontitis (Early)**   - Tenderness to percussion/bite, slight PDL widening, no frank periapical radiolucency.   **European Society of Endodontology (ESE)**   - **Diagnosis:** **Symptomatic Irreversible Pulpitis with Early Apical Periodontitis**   - Deep carious lesion approaching pulp chamber. Presence of sharp symptoms on biting/pressure and provoked thermal pain, especially with tenderness on percussion, signals irreversible inflammation. PDL widening confirms early apical involvement12[3](https://onlinelibrary.wiley.com/doi/10.1111/iej.13974). - **Management Emphasis:** Full pulpectomy is standard; vital pulp therapy may be considered in select mild cases, but in the context of typical clinical signs (bite pain, percussion tenderness, deep caries) RCT is standard12.   **Indian Endodontic Society (IES)**   - **Diagnosis:** **Deep Caries with Symptomatic (Irreversible) Pulpitis**   - Characterized by stimulus-related pain (especially on pressure), with additional cold/hot sensitivity. Clinical and radiological findings (deep caries, slight PDL widening) point to irreversible change needing invasive management4. - **Classification:** Strong symptoms, deep caries, and objective sensitivity tests indicate irreversible pulpitis.   **Wolters’ (Minimally Invasive) Classification**   - **Stage:** Moderate/Severe Stage Pulpitis   - Bite sensitivity, provoked but not spontaneous pain, and lingering (even if not prolonged) signal compartmentalized inflammation that cannot be expected to heal without intervention5. - **Management:** Conservative therapies may be considered where inflammation is strictly coronal, but full pulpectomy (RCT) is standard when both mechanical/thermal pain and radiographic/clinical signs are present.   **Comparative Evidence-Based Treatment Recommendations**   | **Guideline** | **Pulpal Dx** | **Periapical Dx** | **Treatment Recommendation** | | --- | --- | --- | --- | | AAE | Symptomatic irreversible pulpitis | Symptomatic apical periodontitis | RCT, full pulpectomy | | ESE | Symptomatic irreversible pulpitis | Early apical periodontitis | RCT. VPT rarely in select mild cases12 | | IES | Irreversible pulpitis (deep caries) | Early apical periodontitis | RCT preferred. Stepwise/partial caries removal not appropriate with such symptoms4 | | Wolters | Moderate/severe (irreversible) | Early apical periodontitis | RCT (less-invasive VPT only if strongly compartmentalized inflammation) |   **Definitive Treatment Plan (Synthesized)**  **1. Pre-operative Assessment**   - Confirm diagnosis: Deep caries, typical pulpitis symptoms, and slight apical involvement - Full explanation to patient about pulpal disease, need for intervention, risks/benefits of RCT vs restoration alone   **2. Non-Surgical Root Canal Treatment (RCT)**   - **Asepsis:** Strict rubber dam isolation and field disinfection - **Access & Debridement:** Remove all caries, assess pulp, obtain working length (apex locator/radiograph) - **Chemomechanical Instrumentation:** Rotary/hand files. Copious irrigation (NaOCl 2.5–5.25%) - **Obturation:** Gutta-percha with bioceramic or resin sealer; verify adequate fill radiographically - **Definitive Restoration:** Vital for long-term success—preferably a bonded composite or appropriately designed post/crown if significant structure is lost - **Pain Control:** Appropriate local anesthesia and analgesics   **3. Follow-Up Protocol**   - Re-exam at 1 week, then 3, 6, and 12 months, then annually. Monitor for symptom resolution, apical healing on radiographs41. - Clinical tests: Evaluate for return to function, absence of tenderness. - Avoid delay—progression to necrosis can occur if pulpal infection not addressed.   **Key Prognosis Points**   - **Success rates >90%** for RCT in cases with early apical involvement241. - Vital pulp therapy (partial/full pulpotomy) **not recommended** unless intraop findings suggest strictly limited inflammation (rare—a clinical call which is generally excluded by pain on biting and percussion)145. - Endodontic microsurgery/extraction reserved only for RCT failure or non-restorable cases.   **Patient Counseling**   - Explain that deep caries with classic thermal and biting pain, even if symptoms are transient, constitutes irreversible damage. - Warn that incomplete therapy (restoration alone) will almost certainly result in pulpal necrosis and apical pathology. - Emphasize importance of definitive restoration and periodic review for lasting success4152.   **Evidence-Based Rationale**   - The full spectrum of modern guidelines (AAE, ESE, IES, and contemporary literature) agrees: **In a tooth with deep caries, sharp pressure and thermal pain, percussion tenderness, and early PDL widening, standard of care is complete pulpectomy (RCT) followed by high quality restoration.** - **Selective/stepwise caries removal, indirect treatment, or vital pulp therapy are not predictable in these scenarios.** - **Prognosis is excellent** when standard protocols and bioactive materials are used; periodic recall is essential to monitor for late complications.   **In summary**: In this patient, all contemporary international recommendations converge: the diagnosis is symptomatic irreversible pulpitis with early apical periodontitis, best treated with root canal therapy and prompt, high-quality restoration. This preserves the tooth with minimal risk, avoids overtreatment, and optimally restores function and patient comfort | **Comparative Diagnosis According to Evidence-Based Guidelines**  **Case Summary**   - **Patient**: 50-year-old male, lower left canine (#22) - **Symptoms**: Sharp pain when biting; intermittent quick pain to hot/cold; no spontaneous or lingering pain - **Findings**: Deep carious lesion with marginally broken amalgam, no cracks, tenderness to percussion and bite, PDL widened apically but no radiolucency, pulp chamber not yet involved on radiograph - **Vitality Testing**: Sharp, immediate pain to cold and heat (subsides quickly), vital pulp   **Guideline-Based Diagnostic Comparison**  **AAE (American Association of Endodontists)**   - **Pulpal Diagnosis**: *Symptomatic Reversible or Possibly Early Irreversible Pulpitis*   - Sharp, stimulus-dependent pain that quickly resolves suggests *reversible pulpitis*.   - However, presence of bite pain and percussion tenderness with deep caries suggests pulpal inflammation may be advancing toward *irreversible pulpitis*, though classic irreversible pulpitis often has lingering pain to stimulus or spontaneous pain[1](https://www.aae.org/specialty/wp-content/uploads/sites/2/2017/07/endodonticdiagnosisfall2013.pdf)[2](https://www.msdmanuals.com/professional/dental-disorders/common-dental-disorders/pulpitis)[3](https://www.aae.org/specialty/wp-content/uploads/sites/2/2017/07/aaeconsensusconferencerecommendeddiagnosticterminology.pdf). - **Periapical Diagnosis**: *Symptomatic Apical Periodontitis (early)*   - Slight PDL widening and pain on biting indicate early apical inflammation without full necrosis or abscess formation.   **ESE (European Society of Endodontology)**   - **Diagnosis**: *Deep carious lesion with vital pulp showing reversible or early irreversible pulpitis symptoms; early symptomatic apical periodontitis*   - Recommends conservative therapy if the pulp responds quickly to stimuli, reserving more aggressive treatment for signs of irreversible pulpitis (lingering, spontaneous, or night pain)[4](https://www.frontiersin.org/journals/dental-medicine/articles/10.3389/fdmed.2022.1048137/full)[5](https://pubmed.ncbi.nlm.nih.gov/30664240/).   - Early PDL widening treated by addressing the carious insult and monitoring outcome.   - Full pulpectomy (root canal) reserved for confirmed irreversible inflammation or pulpal exposure during treatment.   **Indian Endodontic Society (IES)/Contemporary Consensus**   - **Diagnosis**: *Deep caries with reversible or early irreversible pulpitis and early apical periodontitis*   - Emphasizes accurate diagnosis after complete caries removal, as symptoms may not match the histologic pulp state[4](https://www.frontiersin.org/journals/dental-medicine/articles/10.3389/fdmed.2022.1048137/full)[6](https://pubmed.ncbi.nlm.nih.gov/30985944/).   - Conservative management first unless clear signs of irreversible damage appear.   **Evidence-Based, Guideline-Synthesized Treatment Plan**  **1. Conservative Caries & Restoration Approach**   - **Complete caries and restoration removal** under aseptic (rubber dam) conditions. - *If the pulp is not exposed and bleeding is minimal*: Place a high-quality composite or glass ionomer restoration.   - **Bioactive liner** (e.g., calcium silicate cement like Biodentine/MTA) may be used if very close to pulp.   **2. Vital Pulp Therapy (If Needed)**   - If a small, clean mechanical pulp exposure occurs during caries removal and the pulp appears healthy:   - **Direct pulp capping** or partial pulpotomy with a biocompatible material is evidence-based, especially with new calcium silicate cements[7](https://pmc.ncbi.nlm.nih.gov/articles/PMC8620894/)[4](https://www.frontiersin.org/journals/dental-medicine/articles/10.3389/fdmed.2022.1048137/full). - If the pulp is heavily inflamed, there is uncontrollable bleeding, or pain becomes spontaneous/lingering, proceed to:   - **Root canal treatment (RCT)**.   **3. Definitive Restoration**   - Place a well-sealed final restoration to prevent reinfection. Address occlusal alignment to avoid high points that could mimic symptoms.   **4. Follow-Up**   - Clinical review in 2–4 weeks to assess symptom resolution. - Further radiograph and sensibility testing at 6–12 months for long-term success and PDL reassessment.   **5. Patient Counseling**   - Explain that many such cases improve after caries and restoration management. - Explain signs that may require root canal therapy later: development of lingering or spontaneous pain, increased bite tenderness, or radiographic progression.   **Key Points**   - **Diagnosis:** Deep caries with vital pulp; symptoms and signs mainly indicate reversible or early irreversible pulpitis with early symptomatic apical periodontitis, in the absence of pulp necrosis. - **Guideline Consensus:** All major guidelines (AAE, ESE, IES) advocate conservative management—complete removal of caries and restoration, pulp preservation when possible, and only proceed to root canal if pulpal/clinical symptoms worsen or exposure/irreversibility is confirmed[1](https://www.aae.org/specialty/wp-content/uploads/sites/2/2017/07/endodonticdiagnosisfall2013.pdf)[2](https://www.msdmanuals.com/professional/dental-disorders/common-dental-disorders/pulpitis)[4](https://www.frontiersin.org/journals/dental-medicine/articles/10.3389/fdmed.2022.1048137/full). - **Vital pulp therapy is increasingly supported for such borderline/early irreversible cases**, especially where hemostasis and pulp health can be confirmed after caries excavation.   **In summary:** The primary evidence-based approach is careful removal of caries and existing restoration, restoration with a biocompatible material, close monitoring, and escalation to RCT only if irreversible symptoms or exposure are observed. This maximizes pulp survival and tooth longevity, as all contemporary sources recommend for this presentation. | **Comparative Diagnosis According to Major Guidelines**  **Case Summary**   - **Patient:** 50-year-old male, lower left canine (#22) - **Symptoms:** Sharp pain on biting, intermittent sensitivity to hot and cold that resolves immediately, no spontaneous or night pain - **Clinical findings:** Deep lingual carious lesion with large, broken restoration, no cracks/fractures, no mobility, healthy periodontal status - **Vitality tests:** Quick, sharp response to cold/heat (transient), positive EPT, percussion tenderness - **Radiograph:** Deep caries near but not into pulp, recurrent decay, minor PDL widening at apex, no periapical radiolucency or necrosis   **Diagnostic Comparison**  **AAE (American Association of Endodontists)**   - **Pulpal Diagnosis:** **Reversible Pulpitis (Most Likely)**   - Sharp pain upon biting and stimulus-related temperature sensitivity subsiding quickly without lingering pain point to reversible pulpitis[1](https://bmcoralhealth.biomedcentral.com/articles/10.1186/s12903-021-01696-9)[2](https://www.aae.org/specialty/wp-content/uploads/sites/2/2017/07/endodonticdiagnosisfall2013.pdf).   - PDL widening and pain on biting may also indicate early symptomatic apical periodontitis, possibly due to deep caries or failing restoration[3](https://decisionsindentistry.com/article/universal-classification-endodontic-diagnosis/)[4](https://www.sciencedirect.com/topics/medicine-and-dentistry/periapical-periodontitis). - **Periapical Diagnosis:** **Normal/Very Early Symptomatic Apical Periodontitis**   - Slight PDL widening without radiolucency and mild percussion tenderness are often the initial signs of apical periodontitis, typically reversible if the primary cause is eliminated[3](https://decisionsindentistry.com/article/universal-classification-endodontic-diagnosis/)[4](https://www.sciencedirect.com/topics/medicine-and-dentistry/periapical-periodontitis).   **ESE (European Society of Endodontology)**   - **Diagnosis:** **Reversible or Mild Symptomatic Pulpitis**   - Symptoms limited to stimulus-elicited pain (brief, sharp) from deep caries with a vital pulp and no spontaneous or lingering pain are classic for reversible pulpitis[5](https://onlinelibrary.wiley.com/doi/10.1111/iej.13974)[6](https://www.nature.com/articles/s41415-025-8335-x).   - Early, mild apical changes (PDL widening) are consistent with initial apical inflammation, treatable with conservative care[4](https://www.sciencedirect.com/topics/medicine-and-dentistry/periapical-periodontitis). - **Management Preference:** Conservative caries removal, vital pulp preservation, and high-quality restoration if pulp is not exposed.   **Indian Endodontic Society (IES)**   - **Diagnosis:** **Reversible Pulpitis/Deep Carious Lesion with Mild Symptomatic Apical Changes**   - Tooth with mild pain from deep caries, positive pulp sensibility tests, and no spontaneous or lingering discomfort is managed with conservative caries removal and pulp-preserving restoration if feasible[7](https://ies.org.in/images/pdf/vital-pulp-therapy-ies-position-statement.pdf).   - Their Vital Pulp Therapy (VPT) guidelines stress conservative management for positive pulp test teeth with transient, stimulus-dependent symptoms.   **Comparative Table**   | **Guideline** | **Pulpal Diagnosis** | **Periapical Diagnosis** | **Management Recommendation** | | --- | --- | --- | --- | | AAE | Reversible pulpitis | Very early/symptomatic apical periodontitis | Remove caries/restoration, preserve pulp[1](https://bmcoralhealth.biomedcentral.com/articles/10.1186/s12903-021-01696-9)[2](https://www.aae.org/specialty/wp-content/uploads/sites/2/2017/07/endodonticdiagnosisfall2013.pdf) | | ESE | Reversible/mild pulpitis | Early apical inflammation | Conservative care, high-quality restoration[5](https://onlinelibrary.wiley.com/doi/10.1111/iej.13974)[6](https://www.nature.com/articles/s41415-025-8335-x) | | IES | Reversible pulpitis | Early apical response | Selective caries removal, monitor pulp vitality[7](https://ies.org.in/images/pdf/vital-pulp-therapy-ies-position-statement.pdf) |   **Definitive, Evidence-Based Treatment Plan**  **1. Initial Assessment**   - Confirm diagnosis: Re-test pulp vitality, careful crack inspection (magnification/transillumination), and check occlusion for possible functional overload. - Ensure tooth is restorable.   **2. Caries & Restoration Management**   - **Aseptic protocol:** Rubber dam, disinfection. - **Selective/stepwise caries removal:**   - Remove all caries and failed restoration, preserving as much healthy dentin as possible[7](https://ies.org.in/images/pdf/vital-pulp-therapy-ies-position-statement.pdf).   - For deep lesions, leave a small layer of affected but non-infected dentin near the pulp to avoid exposure (stepwise approach).   - If the pulp is inadvertently exposed but normal and hemostasis is achieved, a direct pulp cap with a biocompatible calcium silicate cement (MTA/Biodentine) is possible. - **Definitive restoration:** Place a well-adapted, high-seal composite or full-coverage restoration for large lesion.   **3. Vital Pulp Protection**   - **For deep but not exposed pulp:** Indirect pulp capping or stepwise approach is recommended. Use a biocompatible liner beneath the restoration for added protection against microleakage. - **If vital pulp exposure occurs:** Direct pulp cap or shallow pulpotomy with bioactive material, provided bleeding is easily controlled and there are no signs of irreversible disease.   **4. Follow-Up**   - **Short term** (1–2 weeks): Assess for subsiding biting pain and thermal sensitivity. - **Medium term** (6–12 weeks): Repeat pulp sensibility testing, clinical exam, and radiograph. - **Long term:** Annual review to ensure absence of symptoms and any apical progression. - **Red flags:** Development of lingering pain, spontaneous pain, or new radiographic changes mandates reassessment (possible root canal therapy).   **5. Patient Counseling**   - Explain high prognosis (>90%) for recovery with vital pulp preservation if etiological factors are eliminated and adequate seal is achieved[7](https://ies.org.in/images/pdf/vital-pulp-therapy-ies-position-statement.pdf)[2](https://www.aae.org/specialty/wp-content/uploads/sites/2/2017/07/endodonticdiagnosisfall2013.pdf). - Instruct to report immediately if pain lingers/becomes spontaneous, or swelling develops. - Highlight importance of permanent restoration and recall.   **6. No Immediate Root Canal Therapy**   - Not indicated at this stage by any international guideline, provided symptoms remain reversible and pulp testing remains positive[1](https://bmcoralhealth.biomedcentral.com/articles/10.1186/s12903-021-01696-9)[7](https://ies.org.in/images/pdf/vital-pulp-therapy-ies-position-statement.pdf)[5](https://onlinelibrary.wiley.com/doi/10.1111/iej.13974)[2](https://www.aae.org/specialty/wp-content/uploads/sites/2/2017/07/endodonticdiagnosisfall2013.pdf).   **Key Evidence-Based Points**   - **Classic reversible pulpitis** with early apical inflammation due to deep caries and microleaky restoration. - **Conservative, pulp-preserving care** supported by AAE, ESE, and IES, so long as pain is transient and pulp is vital[1](https://bmcoralhealth.biomedcentral.com/articles/10.1186/s12903-021-01696-9)[7](https://ies.org.in/images/pdf/vital-pulp-therapy-ies-position-statement.pdf)[5](https://onlinelibrary.wiley.com/doi/10.1111/iej.13974)[2](https://www.aae.org/specialty/wp-content/uploads/sites/2/2017/07/endodonticdiagnosisfall2013.pdf)[6](https://www.nature.com/articles/s41415-025-8335-x). - **Definitive restoration and elimination of etiological factors** are critical for successful outcome and healing of initial apical changes. - **Vital pulp therapy** (VPT) is favored when caries is close to but not exposing the pulp and pulp is judged healthy upon direct inspection.   **In summary:** This case best fits reversible pulpitis with very early symptomatic apical periodontitis—well-suited to conservative management (selective/stepwise caries removal, vital pulp therapy if needed, and sound restoration). All major evidence-based guidelines uphold this tooth-saving, minimally invasive approach, with root canal reserved only for progression to irreversible pulpitis or necrosis. |
| 9 | **Comparative Diagnosis: Major Modern Guidelines**  **Case Summary**   - **Patient:** 40-year-old female; lower right front tooth (#25) - **Primary complaint:** Pain on chewing - **Secondary symptoms:** Severe, lingering sensitivity to hot/cold (10–15 seconds); tenderness to percussion; pain on pressure; **no spontaneous pain or swelling** - **Clinical findings:** Deep mesial caries undermining a large lingual composite; no cracks/fractures; positive cold (lingering), exaggerated EPT, percussion positive, bite test pain - **Radiograph:** Large carious lesion near pulp horn, slight apical PDL widening, no periapical radiolucency   **Diagnoses by Guidelines**   | **Guideline/Society** | **Pulpal Diagnosis** | **Periapical Diagnosis** | **Diagnostic Criteria** | | --- | --- | --- | --- | | **AAE** | Symptomatic irreversible pulpitis | Symptomatic apical periodontitis | Lingering hot/cold pain, percussion/bite tenderness, deep caries[1](https://www.perplexity.ai/search/VitalPulpTherapyPositionStatement_v2.pdf)[3](https://www.perplexity.ai/search/Int-Endodontic-J-2019-European-Society-of-Endodontology-position-statement-Management-of-deep-ca.pdf) | | **ESE** | Symptomatic irreversible pulpitis | Early symptomatic apical periodontitis | Prolonged response to cold, pain on chewing, deep caries, PDL widening[3](https://www.perplexity.ai/search/Int-Endodontic-J-2019-European-Society-of-Endodontology-position-statement-Management-of-deep-ca.pdf) | | **Indian Endodontic Society** | Severe symptomatic/irreversible pulpitis (possibly partial) | Early symptomatic apical periodontitis | Severe stimulus-induced, lingering pain, positive tests, early PDL changes[4](https://www.perplexity.ai/search/indian_endodontic_society__position_statement_for.1-3.pdf) | | **Wolters et al.** | Moderate/severe stage pulpitis (vital, partially reversible possible) | Early apical periodontitis | Lingering cold, pain on pressure, no swelling; advocates VPT when feasible[5](https://www.perplexity.ai/search/Int-Endodontic-J-2017-Wolters-Minimally-invasive-endodontics-a-new-diagnostic-system-for-assessi.pdf) |   **Summary of diagnosis:** All guidelines agree this is a classic case of *symptomatic irreversible pulpitis with early/symptomatic apical periodontitis* in a vital tooth. The pulp is vital, but incapable of healing on its own; deep caries, lingering pain, and tenderness to pressure are defining features[1](https://www.perplexity.ai/search/Int-Endodontic-J-2019-European-Society-of-Endodontology-position-statement-Management-of-deep-ca.pdf)[4](https://www.perplexity.ai/search/indian_endodontic_society__position_statement_for.1-3.pdf).  **Comparative Recommended Treatment Plans**  **AAE (American Association of Endodontists)**   - **Traditional recommendation:** Non-surgical root canal treatment (RCT) is the gold standard for symptomatic irreversible pulpitis with apical symptoms[1](https://www.perplexity.ai/search/VitalPulpTherapyPositionStatement_v2.pdf). - **Emerging perspective:** Vital pulp therapy (VPT, especially full or partial pulpotomy with a calcium silicate material) **can be considered** if pulp vitality is confirmed after caries removal and there's no extensive bleeding/necrosis[2](https://www.perplexity.ai/search/Australian-Dental-Journal-2023-Kahler-Vital-pulp-therapy-for-permanent-teeth-with-diagnosis-of-i.pdf). - **Definitive restoration**: Immediate, well-sealed restoration after treatment.   **ESE (European Society of Endodontology)**   - **Primary approach:** Full pulpectomy (RCT) is standard for irreversible pulpitis with apical involvement. *However*, full pulpotomy (VPT with MTA/Biodentine) may also be considered in mature teeth—if hemostasis is achieved after coronal pulp removal and no necrosis/bleeding persists[3](https://www.perplexity.ai/search/Australian-Dental-Journal-2023-Kahler-Vital-pulp-therapy-for-permanent-teeth-with-diagnosis-of-i.pdf). - **Follow-up**: Long-term monitoring (minimum 1 year, ideally up to 4 years).   **Indian Endodontic Society**   - **Preferred:** Full pulpectomy for complete irreversible pulpitis. Partial or full pulpotomy (VPT) is advised if inflammation is confined to the coronal pulp (partial irreversible pulpitis); case selection depends on intraoperative assessment and ability to achieve hemostasis within 5–10 minutes after pulp removal[4](https://www.perplexity.ai/search/indian_endodontic_society__position_statement_for.1-3.pdf). - **Materials:** Strong emphasis on hydraulic calcium silicate cements for VPT; immediate definitive restoration is critical.   **Minimally Invasive/Contemporary (Wolters et al., Current Evidence)**   - **Vital pulp therapy (full pulpotomy):** Considered a valid alternative in symptomatic irreversible pulpitis if bleeding is controlled after coronal pulp removal, as the radicular pulp may retain healing potential—especially in young/healthy patients[5](https://www.perplexity.ai/search/Australian-Dental-Journal-2023-Kahler-Vital-pulp-therapy-for-permanent-teeth-with-diagnosis-of-i.pdf). - **Success rates:** Full pulpotomy shows 85–95% success rates at 1–5 years in current literature[6](https://www.perplexity.ai/search/Australian-Dental-Journal-2023-Kahler-Vital-pulp-therapy-for-permanent-teeth-with-diagnosis-of-i.pdf). - **RCT:** Performed if VPT fails or is not indicated due to pulpal necrosis/uncontrolled bleeding[6](https://www.perplexity.ai/search/Australian-Dental-Journal-2023-Kahler-Vital-pulp-therapy-for-permanent-teeth-with-diagnosis-of-i.pdf).   **Definitive, Evidence-Based Treatment Plan**  **Pre-operative Evaluation**   - **Reconfirm diagnosis** with repeated cold/EPT and clinical examination. - **Assess tooth restorability** and periodontium.   **Stepwise Treatment**   1. **Aseptic protocol**: Dental dam, disinfection, magnification. 2. **Complete caries removal** to assess pulp exposure and tissue status:    - If no pulpal exposure: Place a biocompatible liner and definitive restoration.    - If exposure with vital pulp and controlled bleeding (<5–10 min):      - **Full pulpotomy** (recommended first for VPT): Remove entire coronal pulp to canal orifice, achieve hemostasis with NaOCl/CHX; cap with 2–3 mm hydraulic calcium silicate cement (MTA/Biodentine).      - **Immediate permanent restoration** (composite/crown as needed). 3. **If uncontrolled bleeding or necrotic tissue found**: Proceed with **root canal treatment** (pulpectomy, full chemomechanical preparation, bioceramic sealer, obturation, immediate definitive restoration). 4. **Pain management**: NSAIDs as needed.   **Follow-up Schedule**   - **Short-term**: Re-evaluate at 1 week and 1–3 months for pain/symptom resolution. - **Long-term**: 6–12 months and yearly up to 4 years with clinical and radiographic evaluation.   **Success Criteria**   - Resolution of pain and percussion tenderness - Maintenance (or return) of pulpal vitality (if VPT) - No development of periapical radiolucency - Functional, durable restoration   **Patient Counseling**   - **Explain both options** (VPT vs RCT), evidence for each, and high success of VPT in appropriately selected teeth. - **Emphasize follow-up**: Early detection of failure is key; root canal remains an option if VPT fails. - **Discuss cost, time, and tooth structure preservation with VPT**.   **Key Guideline Consensus & Emerging Insights**   - All major organizations agree *irreversible pulpitis with apical symptoms* requires definitive intervention. - **RCT remains the reference standard** but **full pulpotomy (VPT) is now supported by high-level evidence and endorsed by AAE, ESE, IES, and contemporary literature as a definitive option in many cases—**provided bleeding is controlled after coronal pulp removal and infection is managed with bioceramic materials**[3](https://www.perplexity.ai/search/indian_endodontic_society__position_statement_for.1-3.pdf)[2](https://www.perplexity.ai/search/Australian-Dental-Journal-2023-Kahler-Vital-pulp-therapy-for-permanent-teeth-with-diagnosis-of-i.pdf). - **Immediate, well-sealed restoration and long-term monitoring are essential for either approach**. - Success rates mirror RCT (up to 90–95% at 2–5 years) for appropriately selected VPT cases.   **In summary:** This is a classic case of symptomatic irreversible pulpitis with early symptomatic apical periodontitis. Modern evidence and all major guidelines support either full pulpectomy (RCT, the gold standard) or full pulpotomy (VPT with MTA/Biodentine), provided case selection is careful and the protocol is strictly followed. Both approaches yield high success and the choice should be explained to the patient, allowing them to participate in the decision | **Comparative Diagnosis According to Major Guidelines**  **Case Summary**   - **Patient:** 40-year-old female, lower right front tooth (#25) - **Chief complaint:** Pain on chewing - **Secondary symptoms:** Lingering sensitivity (10–15sec) to hot/cold, tenderness to percussion, no spontaneous pain or swelling - **Clinical:** Deep mesial carious lesion undermining restoration, no cracks/fractures, positive percussion/bite - **Vitality tests:** Cold (lingering), EPT (exaggerated response) - **Radiographic:** Large caries approaching pulp horn, slight PDL widening, lamina dura slightly blurred, no periapical radiolucency   **Diagnostic Classification: Major Guidelines**   | **Guideline/Source** | **Pulpal Diagnosis** | **Apical/Periapical Diagnosis** | **Diagnostic Criteria** | | --- | --- | --- | --- | | **AAE** | Symptomatic irreversible pulpitis | Symptomatic apical periodontitis | Lingering thermal pain, vital pulp, percussion tenderness, slight PDL widening, no periapical RL[1](https://decisionsindentistry.com/article/universal-classification-endodontic-diagnosis/)[2](https://mtnviewendo.com/aae-dx-terminology/) | | **ESE** | Symptomatic irreversible pulpitis | Early apical periodontitis (=AP) | Lingering hot/cold pain, pain on biting, deep caries; PDL change but no RL[3](https://pubmed.ncbi.nlm.nih.gov/37772327/)[4](https://www.nature.com/articles/s41415-022-5316-1) | | **IES** | Symptomatic irreversible pulpitis (likely partial) | Early apical involvement | Severe sensitivity, no necrosis, percussion tenderness; deep caries with early PDL change[5](https://ies.org.in/images/pdf/vital-pulp-therapy-ies-position-statement.pdf) |   **Key Points**   - **Lingering, severe pain to hot/cold and biting pain:** Consistent with irreversible pulpitis. - **Tenderness to percussion and slight PDL widening:** Early apical periodontitis, but no necrosis. - **Deep caries + vital pulp:** Crucial to assess if inflammation is limited (coronal) or complete (coronal & radicular pulp).   **Comparative Evidence-Based Treatment Recommendations**  **AAE (American Association of Endodontists)**   - **Primary treatment:** Root canal treatment (RCT) is indicated for symptomatic irreversible pulpitis with apical symptoms. Alternative: Full pulpotomy may be considered if coronal inflammation is established and radicular pulp judged healthy, but is less traditional for this scenario[6](https://pmc.ncbi.nlm.nih.gov/articles/PMC10689073/)[1](https://decisionsindentistry.com/article/universal-classification-endodontic-diagnosis/)[7](https://pmc.ncbi.nlm.nih.gov/articles/PMC11991903/). - **Key step:** Complete caries removal for definitive pulpal status assessment.   **ESE S3-Level Guidelines**   - **Primary treatment:** Full pulpotomy or RCT, depending on the intraoperative assessment:   - If coronal pulp only is involved and radicular pulp bleeding is easily controlled, consider full pulpotomy (current paradigm shift!)—good evidence (success up to 90–95%)[4](https://www.nature.com/articles/s41415-022-5316-1)[3](https://pubmed.ncbi.nlm.nih.gov/37772327/).   - If bleeding is profuse/uncontrolled or clinical signs of widespread pulp involvement, standard RCT[7](https://pmc.ncbi.nlm.nih.gov/articles/PMC11991903/)[4](https://www.nature.com/articles/s41415-022-5316-1). - **Restoration:** Immediate, well-sealed permanent restoration is critical.   **Indian Endodontic Society (IES)**   - **Diagnosis:** If irreversible changes are confined to the coronal pulp, vital pulp therapy (full pulpotomy) may be preferred. If full involvement/radicular extension (as often with strong lingering pain), RCT is indicated[5](https://ies.org.in/images/pdf/vital-pulp-therapy-ies-position-statement.pdf). - **Notes:** Caries removal and direct evaluation of radicular pulp—the degree and speed of bleeding is a key factor.   **Synthesized, Definitive Treatment Plan**  **1. Clinical Re-assessment/Preparation**   - Confirm diagnosis: check for cracks (transillumination, magnification). - Ensure restorability. - Profound local anesthesia, rubber dam.   **2. Caries Removal and Pulpal Assessment**   - Remove all caries and compromised restoration. - Assess for pulp exposure and bleeding characteristics:   - **If minimal exposure and bleeding is controlled in <3min:** Full pulpotomy or partial pulpotomy with calcium silicate cement (MTA/Biodentine)[7](https://pmc.ncbi.nlm.nih.gov/articles/PMC11991903/)[6](https://pmc.ncbi.nlm.nih.gov/articles/PMC10689073/)[4](https://www.nature.com/articles/s41415-022-5316-1)[5](https://ies.org.in/images/pdf/vital-pulp-therapy-ies-position-statement.pdf).   - **If moderate/large exposure, prolonged or excessive hemorrhage, or signs of deep pulpal involvement:** Proceed to RCT.   **3. Vital Pulp Therapy (VPT) Option (If favorable per above)**   - Remove coronal pulp to canal orifices. - Hemostasis with gentle pressure, rinse with saline/NaOCl (low conc.). - Place 2–3mm layer of calcium silicate-based cement. - Restore with high-quality composite; ensure tight seal.   **4. Root Canal Therapy Option (If needed)**   - Standard protocol: Chemomechanical debridement, NaOCl irrigation, canal obturation with bioceramic sealer/gutta-percha, and immediate sealed restoration.   **5. Restoration**   - Immediate, well-sealed permanent restoration (composite, or coverage depending on structural compromise).   **6. Follow-up**   - Clinical: Resolution of symptoms (pain, cold sensitivity, etc.), percussion sensitivity gone by 1–2 weeks. - Radiographic: Assess for normalization of PDL at 6–12 months. - Long-term: Annual review for 4 years (per ESE).   **7. Patient Counseling**   - Discuss rationale for conservative (pulpotomy) vs. full RCT options, emphasizing high (>90%) success rates reported for both when properly selected. - Advise regarding return if any lingering or spontaneous pain develops. - Explain that antibiotics are NOT indicated.   **Key Rationale From Guidelines**   - **Lingering thermal pain with percussion tenderness and deep caries:** Symptomatic irreversible pulpitis with early apical involvement—**not reversible**. - **Current guidelines (AAE, ESE, IES):** Adequate clinical, radiographic, and intraoperative assessment determines whether pulpotomy (VPT) or RCT is indicated; both are acceptable for mature teeth if case selection is sound[5](https://ies.org.in/images/pdf/vital-pulp-therapy-ies-position-statement.pdf)[7](https://pmc.ncbi.nlm.nih.gov/articles/PMC11991903/)[4](https://www.nature.com/articles/s41415-022-5316-1). - **Restoration quality and follow-up** are critical for long-term outcome.   **In summary:** This is a classic scenario of symptomatic irreversible pulpitis with early apical involvement. All major guidelines recommend complete caries removal and assessment for minimally invasive pulp therapy (full pulpotomy) or, more traditionally, RCT. Both have high success when performed with correct case selection, aseptic technique, and high-quality restoration. Lingering pain and apical changes do not preclude VPT, but if hemostasis cannot be achieved or extensive pulp involvement is found, proceed with RCT.   - AAE, ESE, IES all support this approach based on robust evidence and consensus | **Comparative Diagnosis According to Major Guidelines and Classifications**  **Case Synopsis**   - **Patient:** 40-year-old female, lower right front tooth (#25) - **Chief complaint:** Pain on chewing; secondary symptoms of severe, lingering sensitivity to hot/cold (10–15 seconds), tenderness to percussion/bite, no spontaneous pain or swelling - **Clinical findings:** Deep mesial caries undermining a large lingual composite, no cracks, healthy periodontium - **Vitality tests:** Cold: lingering pain; EPT: exaggerated response; percussion: positive; bite: pain on pressure - **Radiographic findings:** Large carious lesion near pulp horn, slight PDL widening, no periapical radiolucency, lamina dura blurred, recurrent caries under restoration   **Guideline-Based Diagnostic Comparisons**  **American Association of Endodontists (AAE)**   - **Pulpal Diagnosis:** **Symptomatic Irreversible Pulpitis**   - *Key features*: Lingering (>10 seconds) pain to thermal tests, severe pain to cold/heat, positive EPT, not resolving with removal of stimulus alone.   - *Supporting signs*: Pain on chewing/biting, percussion sensitivity, deep carious lesion. - **Periapical Diagnosis:** **Symptomatic Apical Periodontitis (Early)**   - PDL widening, no apical radiolucency, tenderness to percussion. - **Management implication:** Root canal therapy (RCT) or pulpotomy preferred; caries alone/infected restoration unlikely to heal pulp.   **European Society of Endodontology (ESE)**   - **Diagnosis:** **Symptomatic Irreversible Pulpitis + Early Apical Periodontitis**   - Symptoms and tests (lingering, provoked pain; percussion tenderness; deep caries) show pulp cannot heal by removing caries alone.   - Slight PDL widening is early apical involvement. - **Treatment options:** Full RCT or *vital pulp therapy* (full pulpotomy) may be considered in select vital teeth, especially if root is mature and hemostasis is easy after coronal pulp removal.   **Indian Endodontic Society (IES) / Contemporary Evidence**   - **Diagnosis:** **Irreversible Pulpitis, Early Symptomatic Apical Periodontitis**   - Pain pattern, positive vitality tests with lingering, severe symptoms are diagnostic.   - Slight PDL widening is confirmatory; carious exposure likely with caries removal. - **Management:** Favors full root canal therapy as first choice. Coronal pulpotomy may be attempted if pulp is judged healthy at canal entrances and bleeding is controlled.   **Recent Evidence**   - Full pulpotomy using calcium silicate cement (e.g., Biodentine) effective for some cases with vital pulp showing moderate symptoms, but most clinical evidence and guidelines agree that persistent, severe symptoms and apical tenderness generally warrant full RCT[1](https://pmc.ncbi.nlm.nih.gov/articles/PMC11991903/)[2](https://www.dentalcare.com/en-us/ce-courses/ce562/pulpal-diagnosis)[3](https://pmc.ncbi.nlm.nih.gov/articles/PMC11108425/). - Symptom relief, survival rates, and radiographic healing are similar for pulpotomy and full RCT in first year when strictly selected, but RCT remains the standard for symptomatic irreversible pulpitis with apical signs.   **Comparative Table**   | **Guideline** | **Pulpal Diagnosis** | **Periapical Diagnosis** | **Treatment Recommendation** | | --- | --- | --- | --- | | AAE | Symptomatic irreversible pulpitis | Symptomatic apical periodontitis | Root canal therapy or pulpotomy (if carefully selected) | | ESE | Symptomatic irreversible pulpitis | Early apical periodontitis | RCT (first-line), pulpotomy (select cases) | | IES | Irreversible pulpitis | Early apical involvement | RCT preferred, pulpotomy possible if healthy pulp at canals |   **Definitive Treatment Plan (Evidence-Based Synthesis)**  **1. Preoperative Assessment**   - Confirm diagnosis (repeat pulp testing if needed). - Ensure tooth is restorable and patient motivated for care. - Explain all options and likely prognosis.   **2. Definitive Treatment**  **A. First-line: Non-surgical Root Canal Therapy (RCT)**   - **Aseptic technique:** Rubber dam isolation throughout. - **Access and assessment:** Open access, inspect pulp; expect inflamed/bleeding pulp tissue. - **Working length determination:** Apex locator + confirmatory radiograph. - **Canal debridement:** Rotary or hand instrumentation, copious NaOCl irrigation, EDTA final rinse. - **Intracanal medication:** If significant symptoms or exudate, place calcium hydroxide and delay obturation (interim); otherwise, continue in same visit. - **Obturation:** Gutta-percha and calcium silicate-based (bioceramic) sealer. - **Coronal restoration:** Well-sealed direct composite; consider cuspal coverage/crown if tooth is structurally compromised.   **B. Alternative: Full-Coronal Pulpotomy (if RCT is not feasible or patient preference)**   - **Procedure:** Remove coronal pulp to orifices, achieve hemostasis within minutes, place bioceramic (Biodentine, MTA) over vital radicular pulp, then restore as above. - **Indication:** Only for teeth with healthy radicular pulp, excellent hemostasis, and patient compliance with close follow-up. - **Long-term prognosis:** Good, but RCT conversion needed if symptoms persist or radiographic signs worsen.   **3. Follow-up**   - **Short-term (1–2 weeks):** Check for symptom resolution, healing, restoration integrity. - **Medium term (6–12 months):** Radiographs to track healing, review for persistent signs/symptoms. - **Long term:** Annual radiographs and pulp checks (for pulpotomy cases) for at least 2–4 years[1](https://pmc.ncbi.nlm.nih.gov/articles/PMC11991903/)[3](https://pmc.ncbi.nlm.nih.gov/articles/PMC11108425/).   **4. Adjuncts**   - **Pain management:** NSAIDs (ibuprofen or combination). - **Antibiotics:** Only if systemic involvement (fever, cellulitis), not for localized irreversible pulpitis. - **Patient counseling:** Prognosis, importance of coronal seal, red flags (spontaneous/lLingering pain, swelling), and recall adherence.   **Key Points & Rationale**   - **Diagnosis:** Symptomatic irreversible pulpitis with early symptomatic apical periodontitis, due to deep caries with lingering thermal pain, apical tenderness, and early PDL changes. - **Management Agreement:** Root canal therapy is the gold standard per AAE, ESE, and IES for cases with these clinical and radiological features[1](https://pmc.ncbi.nlm.nih.gov/articles/PMC11991903/)[4](https://www.aae.org/specialty/wp-content/uploads/sites/2/2017/07/endodonticdiagnosisfall2013.pdf)[2](https://www.dentalcare.com/en-us/ce-courses/ce562/pulpal-diagnosis). Full pulpotomy is an option in very select cases with vital radicular pulp and manageable bleeding, but most long-term data support RCT for apical involvement with severe symptoms. - **Definitive restoration and long-term follow-up** are crucial for tooth survival and healing.   **In summary:** All major guidance supports root canal therapy for a mature tooth with deep caries, severe lingering pain to cold, bite/percussion tenderness, and early apical PDL changes. Vital pulp therapy (full pulpotomy) may be considered only in strictly selected cases, but conventional RCT remains best practice for predictable, long-term success and symptom elimination. |
[truncated: 575,276 more chars]
