# Supplementary material for: Validity and reliability of AI chatbots on the comparative diagnosis and definitive management of deep caries based on position statements evaluated from post-graduate students and clinicians' perspectives
Source: Research Square preprint supplement (doi:10.21203/rs.3.rs-8320702/v1), 2026-01-30
Supplement: Supplementary file 2 [file 9db6b84497e415ee5eb20263.docx]

| **Case History** |
| --- |
| 1. A 25-year-old female patient presented to the dental clinic with a primary concern of **tooth sensitivity to cold** in her upper left front tooth (tooth #7, the upper left central incisor). The patient reported that the discomfort occurred intermittently, particularly when consuming cold beverages or food, but denied any spontaneous pain or lingering sensitivity.   **Clinical Examination:**  **Extraoral Examination:** No significant findings; no swelling, asymmetry, or lymphadenopathy detected.  **Intraoral Examination:**  **Periodontal Status:** Within normal limits; probing depths were ≤ 3 mm with no bleeding on probing, and the gingiva appeared healthy with no signs of inflammation.  **Tooth #7:** A **small carious lesion** was noted on the distal surface, along with a **pre-existing small restoration** (likely a composite filling). No visible cracks, fractures, or significant wear were observed. The tooth responded normally to percussion and palpation.  **Cold Sensitivity Test:** The tooth exhibited a sharp, transient pain in response to cold stimulation (using an ice stick or ethyl chloride), which subsided immediately upon removal of the stimulus.  **Radiographic Examination:** A periapical radiograph of tooth #7 revealed:  A **small carious lesion** extending into dentin but not approaching the pulp chamber.  No periapical radiolucency, widening of the periodontal ligament space, or other signs of **pulp necrosis** or apical pathology.  The existing restoration appeared well-adapted with no signs of secondary caries or marginal leakage.  . |
| 1. A **40-year-old male patient** presented with a **chief complaint of pain upon biting** in his lower right molar (tooth #35). The patient described the pain as sharp and localized, occurring specifically when chewing hard foods. He denied spontaneous pain or sensitivity to hot/cold stimuli but reported discomfort when pressure was applied.   **Clinical Examination:**  **Extraoral Examination:** No swelling, tenderness, or lymphadenopathy detected.  **Intraoral Examination:**  **Periodontal Status:** Normal probing depths (≤ 3 mm), no bleeding on probing, and healthy gingival tissue with no signs of inflammation.  **Tooth #35:**  A **deep carious lesion** was visible, likely undermining an existing **large restoration** (possibly an amalgam or composite filling).  No visible cracks or fractures, but the tooth exhibited **tenderness to percussion**.  **Pulp Vitality Tests:**  **Cold Test:** Normal response (brief, sharp sensation that subsides quickly).  **Electric Pulp Test (EPT):** Positive response, indicating **vital pulp**.  **Bite Test:** Pain elicited when biting.  **Radiographic Examination:**  A periapical radiograph of tooth #35 revealed:  A **large carious lesion** extending deep into dentin, close to the pulp chamber but **no direct pulp exposure**.  The existing **large restoration** showed signs of marginal breakdown, possibly contributing to recurrent decay.  **No periapical radiolucency, root resorption, or other signs of pulp necrosis.**  The periodontal ligament space appeared normal, with no widening or apical pathology. |
| 1. A **30-year-old female patient** presented with a **chief complaint of sensitivity to cold** in her upper right canine (tooth #6). The patient reported a sharp, fleeting pain when consuming cold beverages or breathing in cold air, which subsided immediately after the stimulus was removed. She denied spontaneous pain, lingering discomfort, or pain upon biting.   **Clinical Examination:**  **Extraoral Examination:** No facial swelling, asymmetry, or lymphadenopathy detected. TMJ function was normal.  **Intraoral Examination:**  **Periodontal Status:** Healthy gingiva with probing depths ≤ 3 mm, no bleeding on probing, and no signs of inflammation.  **Tooth #6:**  A **small carious lesion** was noted on the mesial surface, near an existing **small composite restoration**.  No visible cracks, fractures, or wear facets.  **Pulp Vitality Tests:**  **Cold Test (ice stick/ethyl chloride):** Sharp, transient pain that subsided quickly  **Percussion & Palpation:** No tenderness  **Bite Test:** No pain on biting.  **Radiographic Examination:**  A periapical radiograph of tooth #6 revealed:  A **small carious lesion** extending into dentin but **not involving the pulp**.  The existing restoration appeared intact with no signs of recurrent decay or marginal leakage.  **No periapical radiolucency, widening of the PDL, or other signs of pulp necrosis or apical pathology.** |
| 1. A **55-year-old male patient** presented with a **chief complaint of pain upon biting** in his lower left central incisor (tooth #31). The patient described the pain as **sharp and localized**, occurring primarily when chewing or applying pressure. He reported no spontaneous pain but noted lingering discomfort after biting. There was no significant sensitivity to hot or cold stimuli.   **Clinical Examination:**  **Extraoral Examination:**  No facial swelling, lymphadenopathy, or asymmetry detected.  TMJ function was normal, with no clicking or tenderness.  **Intraoral Examination:**  **Periodontal Status:**  Probing depths ≤ 3 mm, no bleeding on probing, and healthy gingival tissue.  No signs of mobility or gingival recession.  **Tooth #31:**  **Deep carious lesion** observed near an existing **large restoration** (likely composite or amalgam).  No visible cracks or fractures.  **Pulp Vitality Tests:**  **Cold Test:** **No response**, suggesting **pulp necrosis**.  **Electric Pulp Test (EPT):** **No response**  **Percussion Test:** **Tenderness to percussion**  **Bite Test:** **Pain on biting**, raising suspicion of **apical periodontitis**.  **Radiographic Examination:**  A periapical radiograph of tooth #31 revealed:  **Large carious lesion** extending deep into dentin, **approaching the pulp chamber**.  **Loss of lamina dura** near the apex, with **slight periapical radiolucency**.  **No root resorption or external/internal root abnormalities.**  The existing restoration showed **marginal breakdown**. |
| 1. A **20-year-old female patient** presented with a **chief complaint of cold sensitivity** in her upper left lateral incisor (tooth #10). The sensitivity was described as a **sharp, transient pain** triggered by cold beverages or air, which subsided immediately after stimulus removal. No spontaneous pain, discomfort on biting, or lingering sensitivity was reported.   **Clinical Examination:**  **Extraoral Examination:**  No facial swelling, asymmetry, or lymphadenopathy.  TMJ function normal.  **Intraoral Examination:**  **Periodontal Status:**  Probing depths ≤ 3 mm, no bleeding on probing.  Healthy gingival contour with no inflammation.  **Tooth #10:**  **Small carious lesion** noted near the **disto-incisal edge**, adjacent to a **small existing composite restoration**.  No cracks, fractures, or wear observed.  **Vitality Tests:**  **Cold Test (ice/ethyl chloride):** Sharp, brief pain .  **Percussion & Palpation:** No tenderness .  **Bite Test:** No pain .  **Radiographic Examination:**  **Periapical Radiograph Findings:**  **Small carious lesion** confined to enamel/dentin junction, **not extending to pulp**.  Existing restoration shows **no recurrent decay or marginal gaps**.  **No periapical radiolucency, PDL widening, or other pathology.** |
| 1. A **45-year-old male patient** presented with a **chief complaint of pain while chewing** and **lingering sensitivity to hot and cold** in his lower right lateral incisor (tooth #34). The patient described the pain as a **dull ache after chewing**, along with a **sharp, prolonged response to hot/cold stimuli** that lasted several seconds.   **Clinical Examination:**  **Extraoral Examination:**  No facial swelling, lymphadenopathy, or asymmetry.  TMJ function normal.  **Intraoral Examination:**  **Periodontal Status:**  Probing depths ≤ 3 mm, no bleeding on probing.  No mobility or gingival recession.  **Tooth #34:**  **Deep carious lesion** undermining a **large existing restoration**.  **Tenderness to percussion** is present.  **Vitality Tests:**  **Cold Test:** **Lingering pain** .  **Heat Test:** **Exacerbated pain** .  **Electric Pulp Test (EPT):** **Delayed or exaggerated response** .  **Radiographic Examination:**  **Periapical Radiograph Findings:**  **Large carious lesion** extending **close to the pulp chamber**.  **Slight widening of the periodontal ligament (PDL) space** near the apex .  **No periapical radiolucency or obvious necrosis yet.**  Existing restoration shows **marginal breakdown** with recurrent decay. |
| 1. A **38-year-old female patient** presented with a **chief complaint of cold sensitivity** in her upper right molar (tooth #3). The patient reported:   Brief, sharp pain with cold stimuli that subsides immediately  No spontaneous pain or discomfort  No pain on biting or chewing  Noticed a small "pimple-like" bump on the gums near the tooth  **Clinical Examination:**  **Extraoral Examination:**  No facial swelling or asymmetry  No lymphadenopathy  TMJ function normal  **Intraoral Examination:**  **Periodontal Status:**  Probing depths ≤ 3mm throughout  No bleeding on probing  No mobility  **Tooth #3:**  Small carious lesion on the occlusal surface adjacent to an existing small restoration  **Draining sinus tract** present in the buccal mucosa near the apex  **Vitality Tests:**  Cold test: **No response**  EPT: **No response**  Percussion: **Slight tenderness**  Palpation: **Buccal swelling** near apex  **Radiographic Examination:**  **Periapical Radiograph Findings:**  Small carious lesion not involving the pulp chamber  **Large, well-defined periapical radiolucency** (~5mm diameter)  **Loss of lamina dura** at apex  **Sclerotic bone borders**  Existing restoration appears intact with no recurrent decay |
| 1. A **50-year-old male patient** presented with a **chief complaint of pain when chewing** in his lower left canine (tooth #22). The patient reported:   Sharp pain when biting down on food  Intermittent sensitivity to both hot and cold stimuli  No spontaneous pain or night pain  Discomfort subsides immediately after removing stimulus  **Clinical Examination:**  **Extraoral Examination:**  No facial swelling or asymmetry  No lymphadenopathy  TMJ function normal  **Intraoral Examination:**  **Periodontal Status:**  Probing depths ≤ 3mm throughout  No bleeding on probing  No mobility (Class 0)  **Tooth #22:**  Deep carious lesion on the lingual surface  Large existing amalgam restoration with marginal breakdown  No visible cracks or fractures  **Vitality Tests:**  Cold test: **Sharp, immediate pain** that subsides quickly.  Heat test: **Mild discomfort** that subsides quickly  Percussion: **Tenderness**  Bite test: **Pain on biting**  **Radiographic Examination:**  **Periapical Radiograph Findings:**  Large carious lesion approaching but not involving the pulp chamber  Existing large restoration with recurrent decay  **Slight widening of PDL space** at apex  **No periapical radiolucency**  **No signs of pulp necrosis** |
| 1. A 40-year-old female presented with:   Primary complaint: Pain on chewing in lower right front tooth  Secondary symptoms:  Severe sensitivity to hot/cold (lingering 10-15 seconds)  Tenderness to percussion  No spontaneous pain or swelling reported  **Clinical Examination:**  Extraoral:  No facial asymmetry or lymphadenopathy  Intraoral:  Periodontal status:  Probing depths 2-3mm  No bleeding on probing  Class 0 mobility  Tooth #25 findings:  Deep mesial caries undermining large lingual composite  No visible cracks or fractures  Vitality tests:  Cold: Lingering pain (15 sec)  EPT: Exaggerated response  Percussion: Positive tenderness  Bite test: Pain on pressure  **Radiographic Findings:**  Periapical radiograph shows:  Large carious lesion approaching pulp horn  Slight PDL widening apically  No periapical radiolucency  Existing restoration with recurrent caries  Lamina dura intact but slightly blurred |
| 1. A 25-year-old male patient presented with a chief complaint of:   Severe lingering pain from cold stimuli (lasting 10-30 seconds)  Sharp pain when consuming sweet foods  Mild discomfort from heat  Tenderness when biting or touching the tooth All symptoms subside spontaneously without medication  **Clinical Examination Findings:**  **Extraoral Examination:**  No facial swelling or asymmetry detected  No lymphadenopathy  Temporomandibular joint function within normal limits  **Intraoral Examination:**  Periodontal status:  Probing depths: 2-3 mm throughout  No bleeding on probing  No mobility or gingival recession  Tooth #11 specific findings:  Small occlusal carious lesion adjacent to existing composite restoration  No visible cracks or fractures observed  Vitality test results:  Cold test: Severe lingering pain (15+ seconds)  Heat test: Mild, brief discomfort  Electric pulp test: Hypersensitive response  Percussion test: Positive tenderness  Bite test: Pain on pressure application  **Radiographic Examination:**  Periapical radiograph revealed:  Small carious lesion confined to dentin  Slight periodontal ligament space widening at apex  No periapical radiolucency present  Existing restoration shows no recurrent decay  Lamina dura appears intact but slightly blurred |
